# Supplementary material for: Transcriptomic Profiling of Yersinia pseudotuberculosis Reveals Reprogramming of the Crp Regulon by Temperature and Uncovers Crp as a Master Regulator of Small RNAs
Source: PubMed Central journal article supplement (PMC4376681; doi:10.1371/journal.pgen.1005087), 2015-03-27
Supplement: pgen.1005087.s003.pdf [file pgen.1005087.s003.pdf]

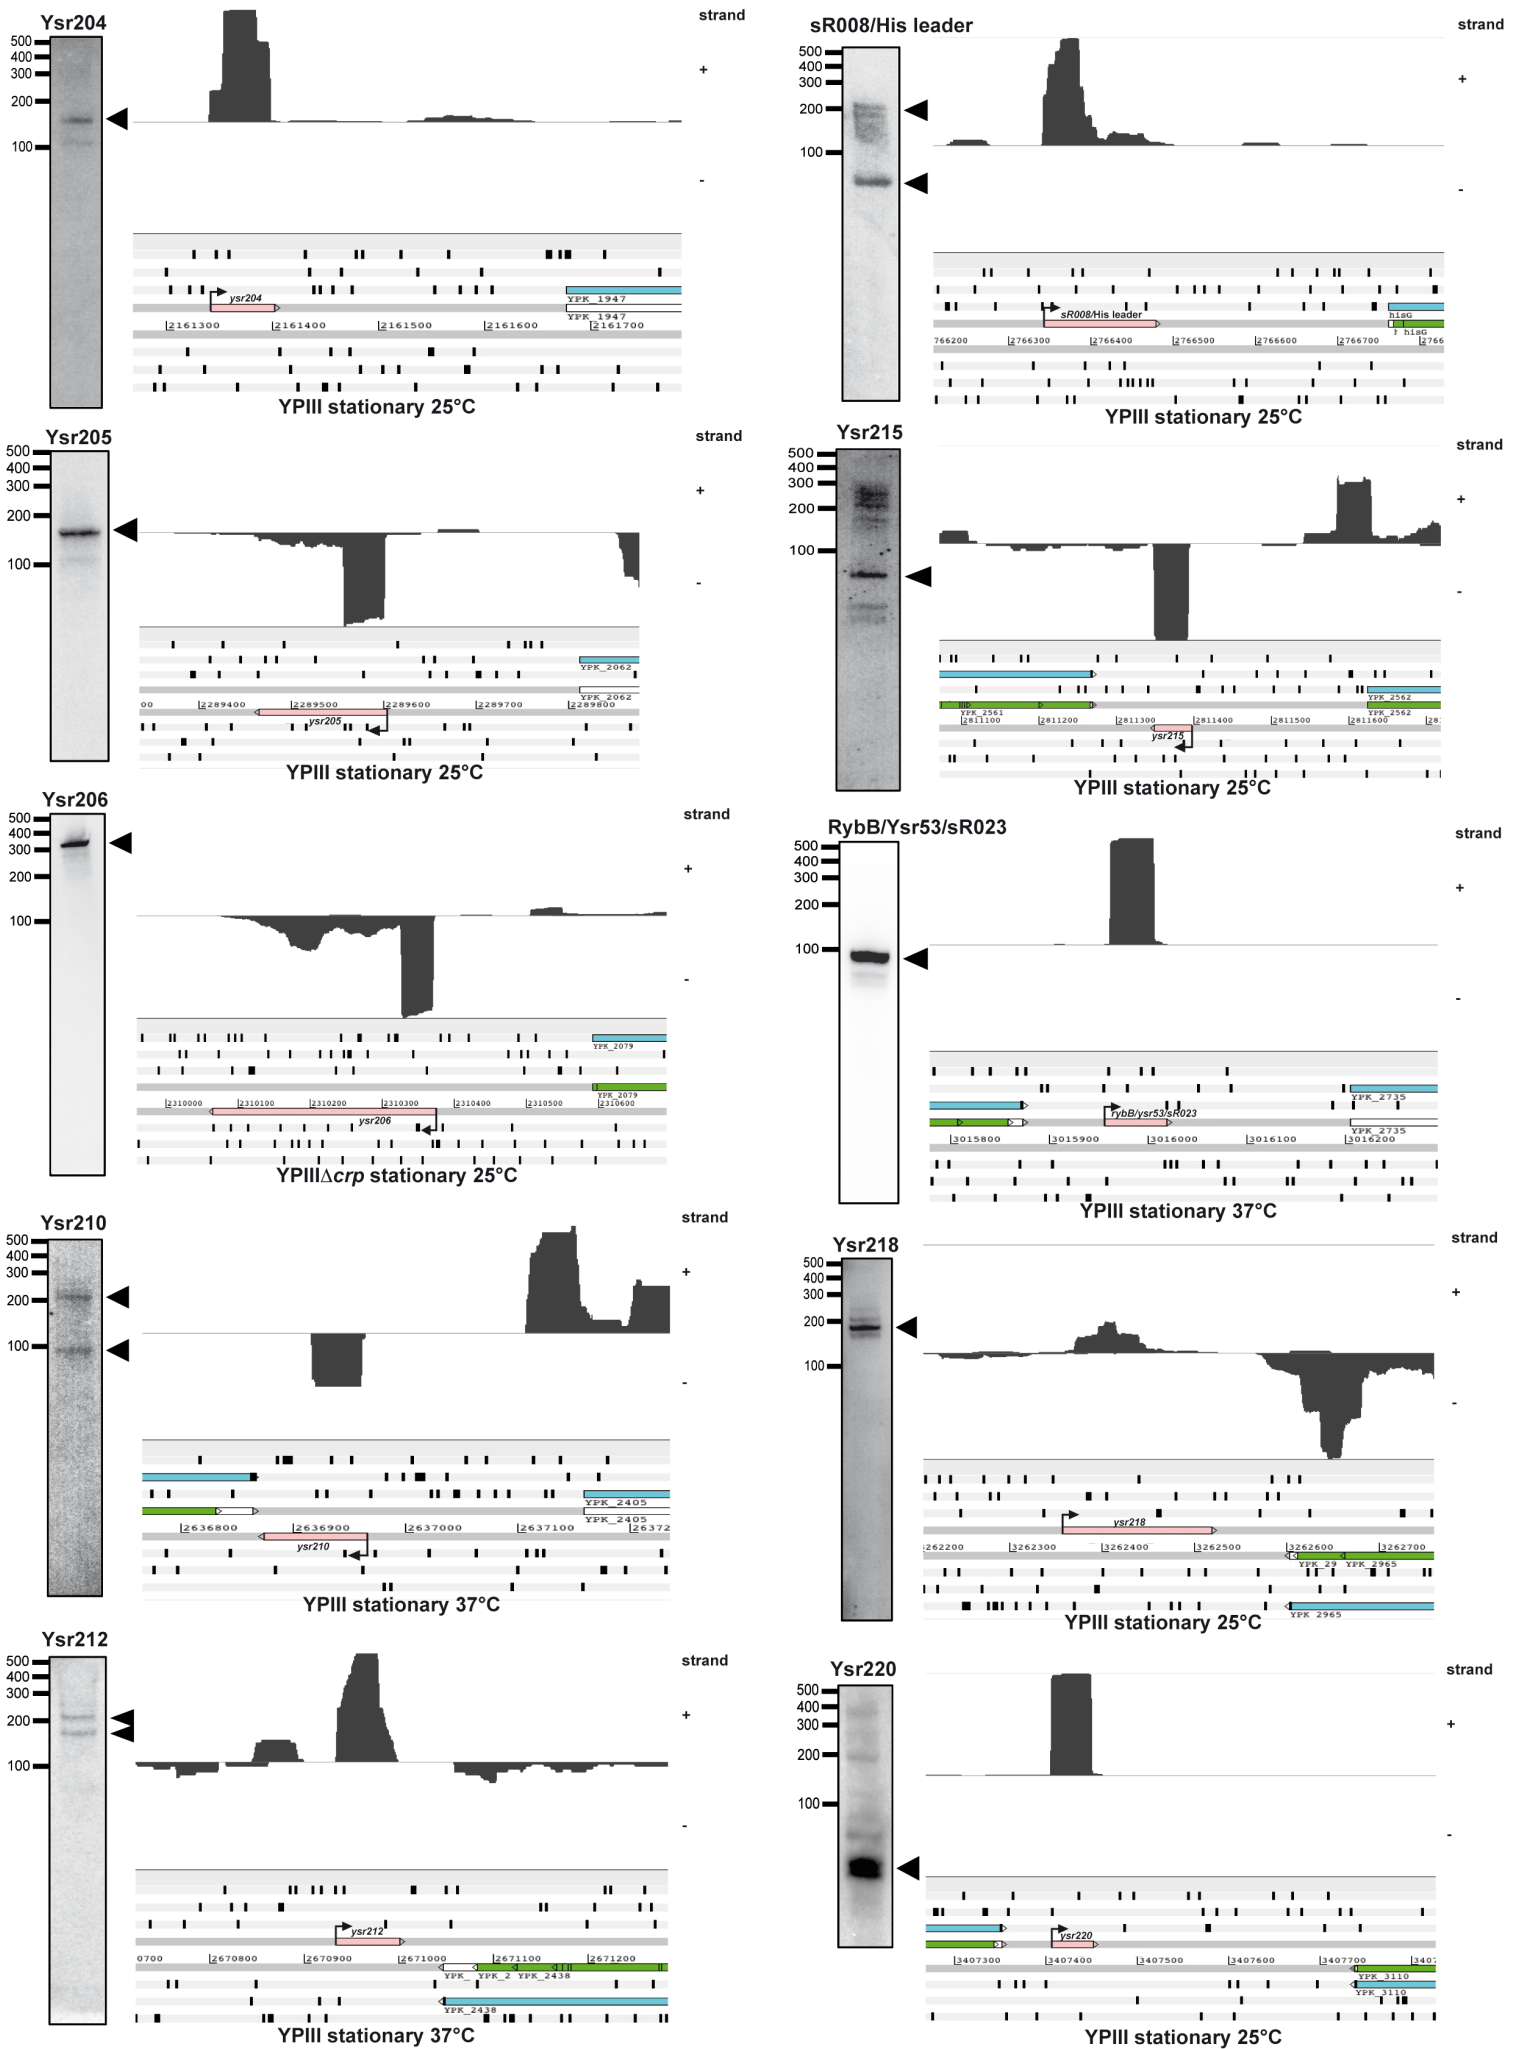

Fig. S2B Nuss *et al.* 2015

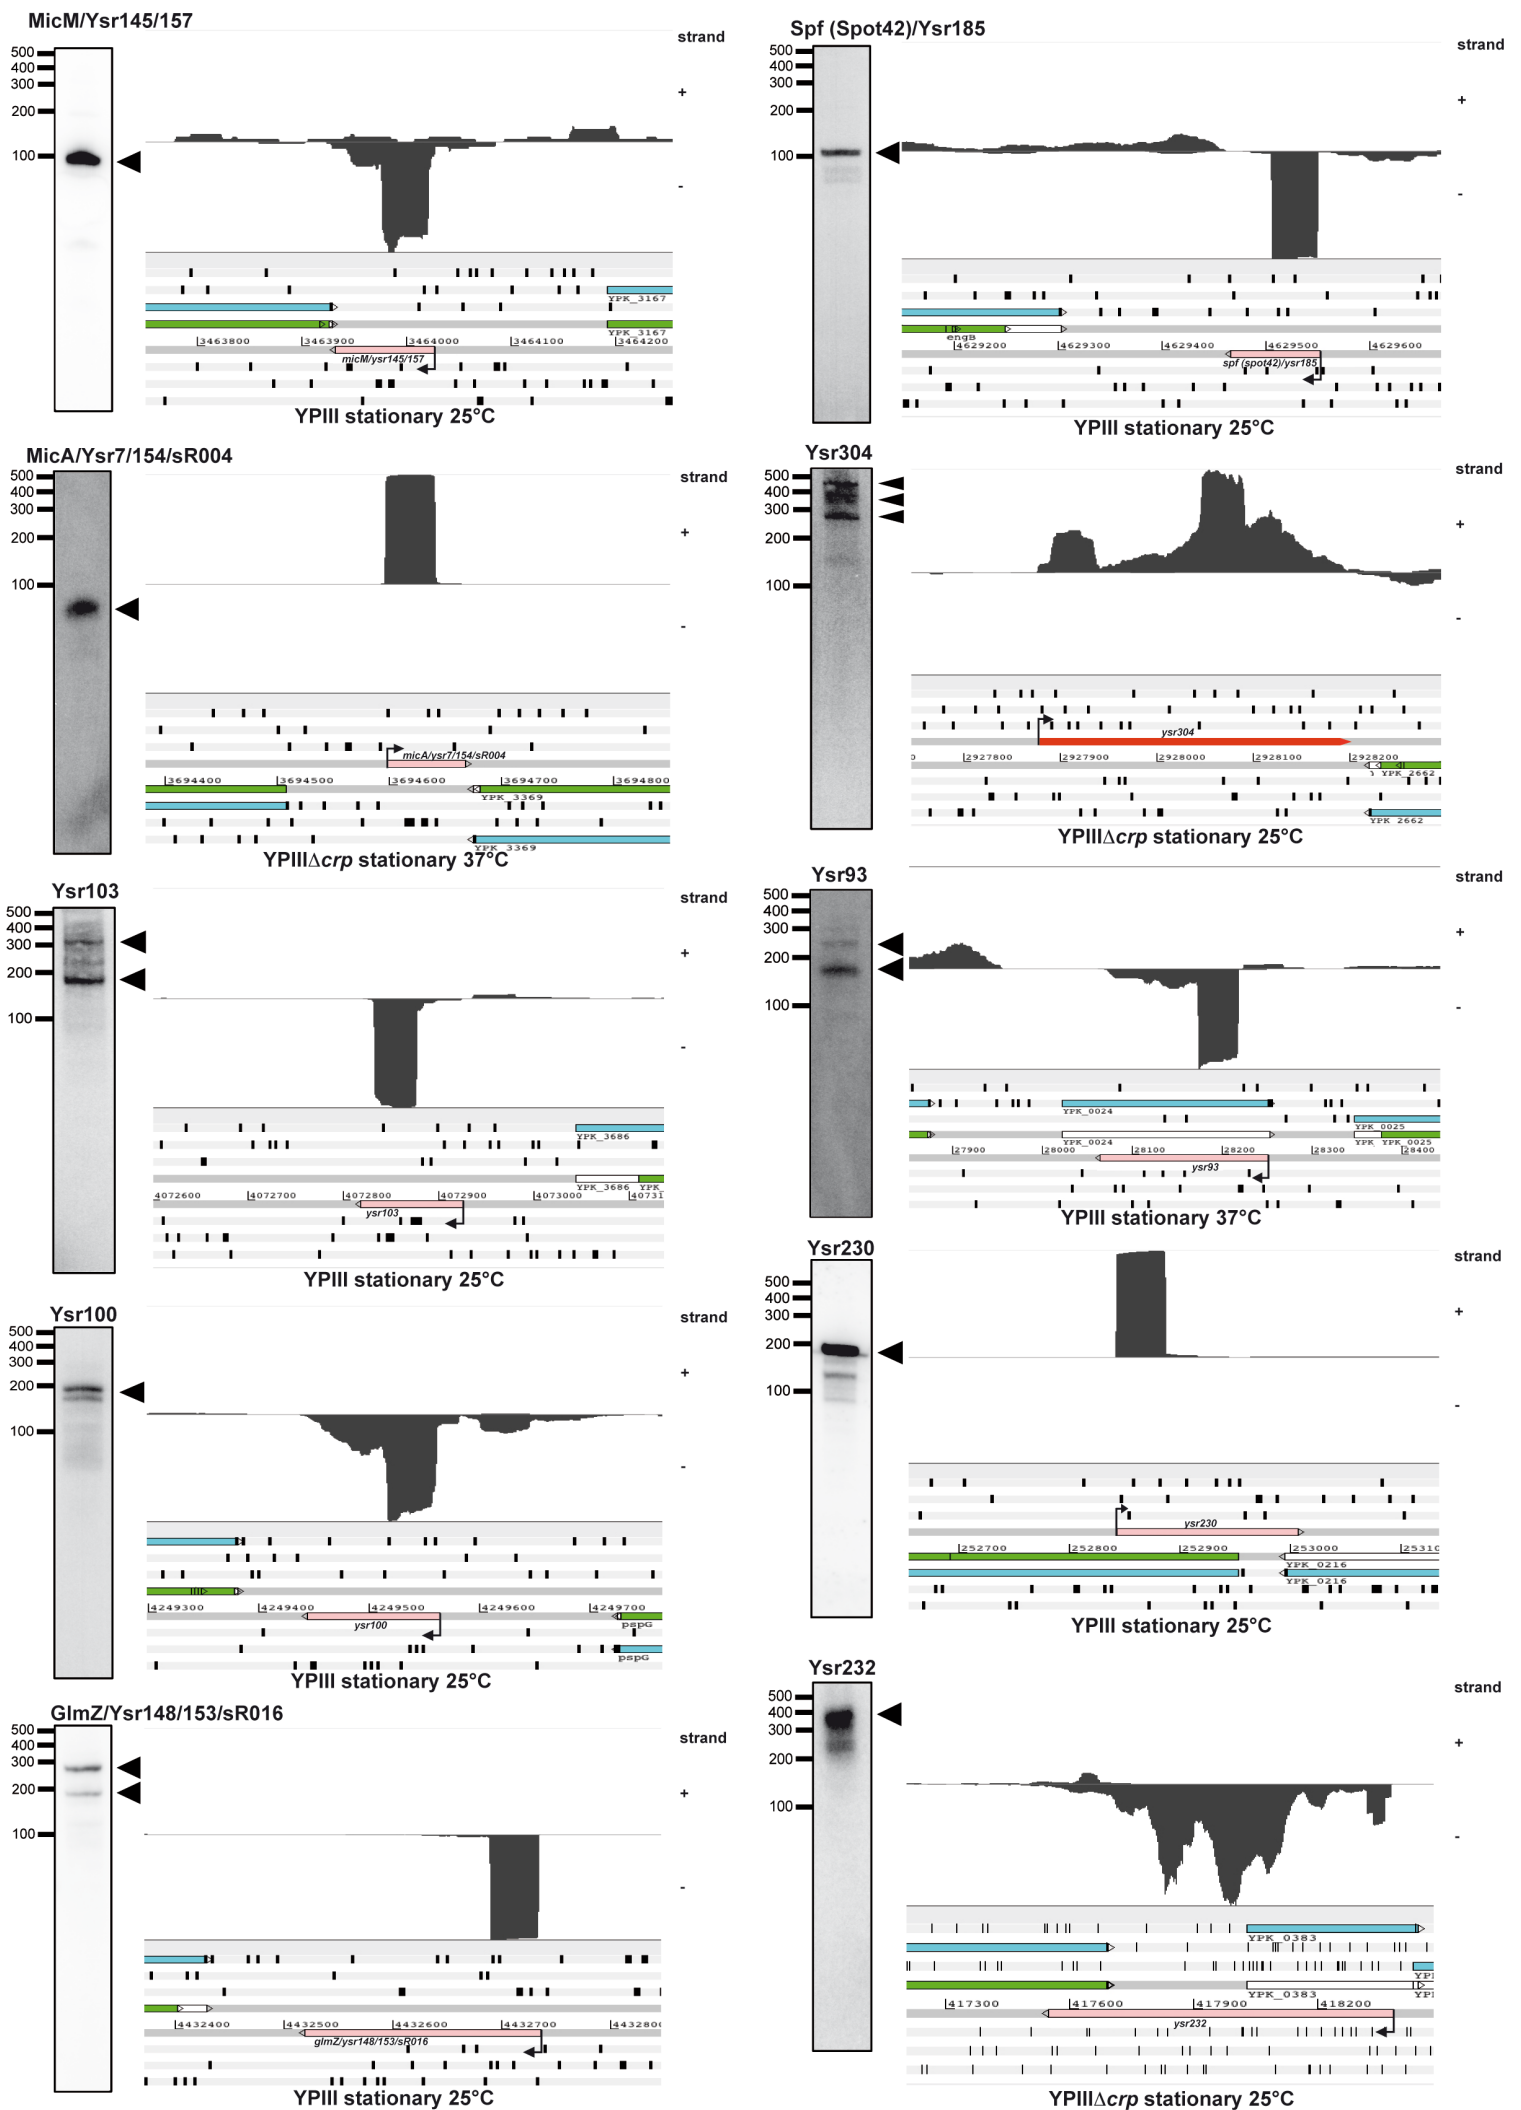

Fig. S2C Nuss et al. 2015

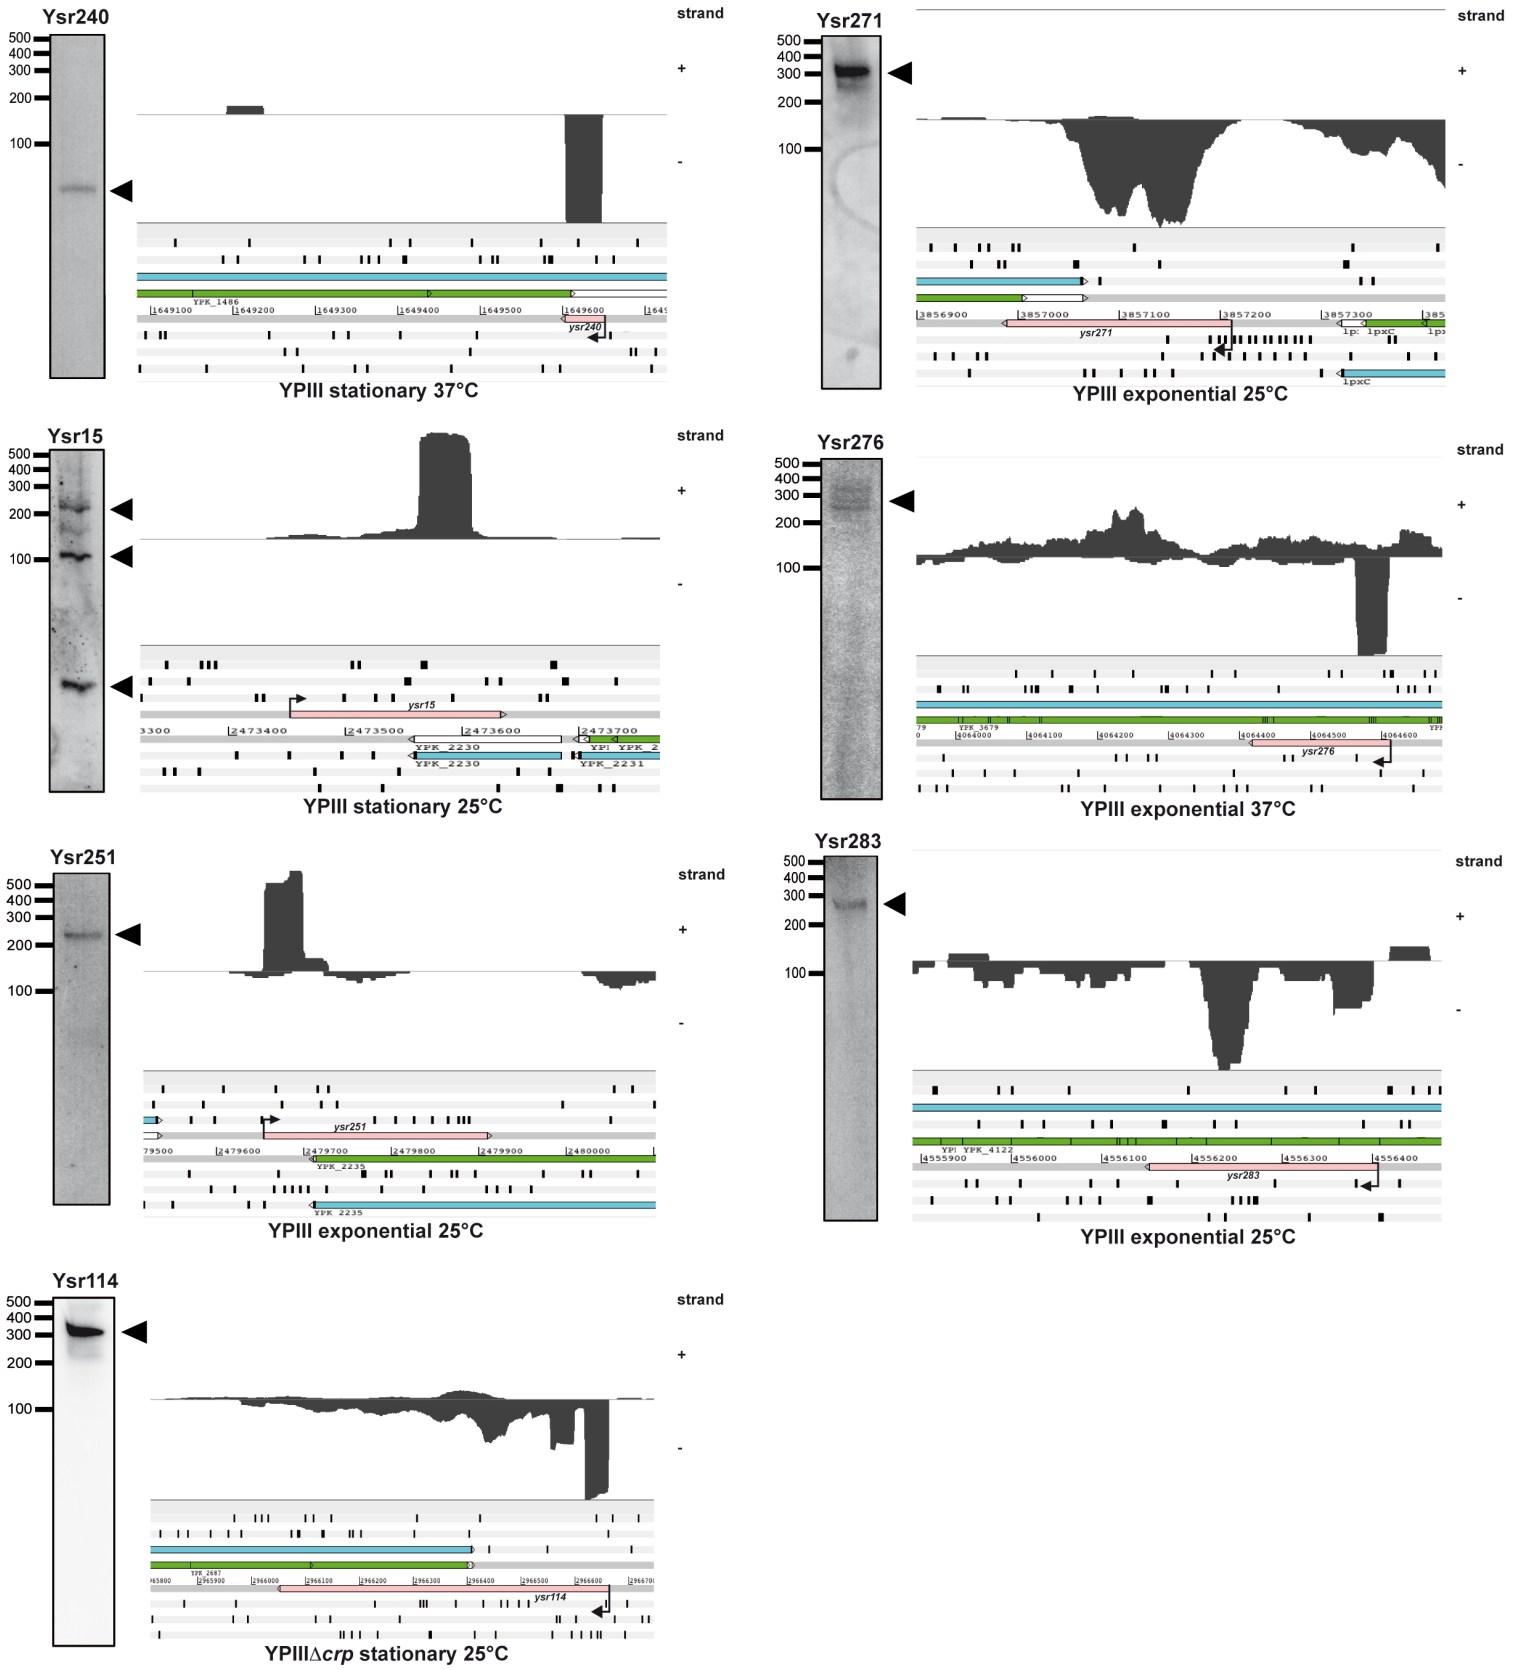

Fig. S2D Nuss *et al.* 2015
