# Supplementary material for: Transcriptomic Profiling of Yersinia pseudotuberculosis Reveals Reprogramming of the Crp Regulon by Temperature and Uncovers Crp as a Master Regulator of Small RNAs
Source: PLoS Genet. 2015 Mar 27;11(3):e1005087. doi: 10.1371/journal.pgen.1005087 (PMC4376681; doi:10.1371/journal.pgen.1005087)
Supplement: S2 Dataset — This table lists all identified TSSs (S2-1), validated TSSs (5’ RACE) (S2-2), predicted riboswitch-like elements (S2-3), leaderless and reannotated TSSs (S2-4) and all sRNAs which were classified as TSS (S2-5) in this study in separate sheets. (XLSX) [file pgen.1005087.s012.xlsx]

## Sheet: TSS
Dataset S2-1: Y. pseudotuberculosis YPIII transcriptional start sites																															dRNA-seq TSSAR p-values10
TSS ID	Accession ID	Strand1	TSS location2	Alternative TSS location3	Length 5'-UTR4 [nt]	TSS category5	First 3 nt6	Associated feature	Gene symbol	Gene description	Identified in YPIII_E257	Identified in YPIII_S257	Identified in YPIII_E377	Identified in YPIII_S377	Identified in YP89_S257	Identified in YP89_S377	Mean read start counts YPIII_E258	Mean read start counts YPIII_S258	Mean read start counts YPIII_E378	Mean read start counts YPIII_S378	Mean read start counts YP89_S258	Mean read start counts YP89_S378	Depletion factor YPIII_E259	p-value YPIII_E25	Depletion factor YPIII_S259	p-value YPIII_S25	Depletion factor YPIII_E379	p-value YPIII_E37	Depletion factor YPIII_S379	p-value YPIII_S37	YPIII_E25	YPIII_S25	YPIII_E37	YPIII_S37
YPKp_TSS_1	NC_006153	-	2698		31	mTSS	TCA	pYV0002		hypothetical protein	0	0	0	1	0	1	7	23	9	418	8	92							0.39	0	6.74021e-05	0.000126997	9.49672e-12	0
YPKp_TSS_2	NC_006153	-	2718		51	mTSS	GGG	pYV0002		hypothetical protein	1	1	1	1	1	1	40	59	70	46	29	22	0.12	1.11497e-25	0.22	7.91899e-32	0.44	0.00275215	0.36	1.01645e-13	0	1.07049e-11	0	0.000233129
YPKp_TSS_3	NC_006153	-	3868		218	mTSS	TTT	pYV0004		hypothetical protein	1	1	1	0	0	0	20	12	25	9	5	8	0	5.99855e-20	0	4.02243e-12	0.07	1.67426e-31			2.50892e-09	0.000787144	0	0.00693384
YPKp_TSS_4	NC_006153	+	5772	5774	31	mTSS	GTA	pYV0006		hypothetical protein	1	1	1	1	1	1	76	16	176	692	95	103	0.05	1.65238e-75	0	4.52291e-05	0.21	0				0.00498927	0.0130229	0.0132146
YPKp_TSS_5	NC_006153	-	6288	6287	36	mTSS	GAA	pYV0007	repB, copB	RepB, RepA2, CopB; putative replication transcriptional regulator	1	1	1	1	1	1	20	26	552	225	25	35					0.46	0			3.0999e-05	8.72361e-06	0.000188559	0.0406057
YPKp_TSS_6	NC_006153	-	10669		268	mTSS	ACA	pYV0013	yadA	Yersinia adhesin A, YadA	0	0	0	0	0	1	4	7	8	94	3	35											2.17756e-10	1.64519e-11
YPKp_TSS_7	NC_006153	+	13832	13830;13831	33	mTSS	AGT	pYV0017		putative resolvase	1	1	1	1	0	1	13	60	15	23	9	11	0.07	0.00389455	0	8.61535e-65	0.13	1.88112e-07			0	1.09011e-07	0	1.01732e-09
YPKp_TSS_8	NC_006153	-	20318	20316	29	mTSS	TAT	pYV0024	sycE, yerA	putative YopE chaperone	0	1	1	1	0	1	9	15	12	58	5	150			0	6.07683e-10	0.37	0.00102265	0.15	3.50385e-27	2.28157e-08	0.0230452	4.63497e-12	0.000154579
YPKp_TSS_9	NC_006153	+	20455		28	mTSS	GTT	pYV0025	yopE	putative outer membrane virulence protein	1	1	1	1	1	1	169	120	312	1376	42	240	0.37	8.67074e-38	0.06	9.0202e-118			0.47	0	0	0	0	0
YPKp_TSS_10	NC_006153	-	20460		171	mTSS	AAA	pYV0024	sycE, yerA	putative YopE chaperone	0	0	0	1	0	0	3	3	0	10	4	3							0	0.000803014	0.00993697
YPKp_TSS_11	NC_006153	-	21843	21842	-6	rmTSS	ACT	pYV0027		hypothetical protein	1	1	1	1	1	1	563	88	1691	138	693	760	0.09	0								3.85897e-14		0
YPKp_TSS_12	NC_006153	-	25277	25278	26	mTSS	CGC	pYV0032	sopA	putative plasmid partitioning transcription repressor	1	1	1	1	0	0	47	15	36	15	7	6	0.05	7.49938e-39	0	4.38617e-12	0.08	6.31057e-37			0	0.00019752	0	9.91289e-13
YPKp_TSS_13	NC_006153	-	25520		269	mTSS	CCC	pYV0032	sopA	putative plasmid partitioning transcription repressor	0	1	1	0	0	0	7	27	20	1	6	2			0	4.89047e-26	0.14	1.23791e-15			2.8664e-07	7.31604e-05	0
YPKp_TSS_14	NC_006153	-	34868	34869	-16	rmTSS	CAG	pYV0047	yopM	putative targeted effector protein	0	0	1	1	0	0	3	0	16	21	0	0					0.28	1.36084e-12	0	6.11661e-26			0	5.11523e-05
YPKp_TSS_15	NC_006153	-	40466		5	lmTSS	GAT	pYV0058	lcrG	putative Yop regulator	1	1	0	1	1	1	32	73	21	534	33	115	0.42	1.26456e-07	0.25	3.14132e-39			0.26	0	0	0	0	0
YPKp_TSS_16	NC_006153	-	45282		37	mTSS	ATT	pYV0065	yopN, lcrE	putative membrane-bound Yop targeting protein	1	1	1	1	1	1	62	33	70	484	21	131					0.45	8.10459e-14	0.21	0	0	8.49404e-05	0	0
YPKp_TSS_17	NC_006153	-	45347		102	mTSS	CAG	pYV0065	yopN, lcrE	putative membrane-bound Yop targeting protein	1	0	1	0	0	0	14	3	42	1	2	5	0.1	4.16154e-06			0.05	1.85969e-31			1.9519e-08		0
YPKp_TSS_18	NC_006153	+	45417	45419;45420	26	mTSS	GTT	pYV0067	sctN	putative Yops secretion ATP synthase	1	1	1	1	1	1	166	80	229	2115	232	2188	0.31	3.10647e-95					0.43	0			1.43862e-05	3.08901e-10
YPKp_TSS_19	NC_006153	+	50277		148	mTSS	AAG	pYV0073	yscT	putative type III secretion protein	1	1	1	1	1	1	13	16	27	54	95	69	0.16	2.68446e-08	0	4.71663e-17	0.21	2.68761e-19			1.03186e-13	3.20725e-05	0	1.56315e-06
YPKp_TSS_20	NC_006153	+	52588		262	mTSS	ATT	pYV0075	virG, yscW	putative Yop targeting lipoprotein	0	0	0	0	1	1	1	7	4	2	150	98											6.83881e-07
YPKp_TSS_21	NC_006153	+	54062		201	mTSS	ATT	pYV0077	yscA	type III secretion protein YscA	0	0	0	1	0	0	0	0	2	15	0	1							0.44	0.00146861				0.023405
YPKp_TSS_22	NC_006153	+	54240	54241;54242	23	mTSS	TTA	pYV0077	yscA	type III secretion protein YscA	1	1	1	0	0	1	33	12	13	110	13	42	0.23	3.12748e-16			0.24	1.48611e-06			0.00189829	0.0239604		1.22387e-05
YPKp_TSS_23	NC_006153	+	61915	61916	28	mTSS	AGA	pYV0089	yscM, lcrQ	putative type III secretion regulatory	0	1	1	1	0	1	5	17	20	22	5	11			0	7.26883e-18	0.21	1.62662e-11					6.60078e-15	0.00212898
YPKp_TSS_24	NC_006153	-	65796		24	mTSS	TGT	pYV0094	yopH	putative protein-tyrosine phosphatase Yop effector	0	1	1	1	0	1	8	22	32	137	4	16			0	3.2453e-16	0.26	3.38965e-14	0.08	2.85121e-156	3.92262e-06	0.00166314	0	1.8239e-14
YPK_TSS_1	NC_010465	+	3737		35	mTSS	TCA	YPK_0004	gyrB	DNA gyrase, B subunit	1	1	1	1	1	0	26	23	16	31	23	6	0.12	1.10726e-16	0	1.25972e-28	0.31	5.8991e-05	0	2.55323e-36	0	0.000270112	0	0.000755498
YPK_TSS_2	NC_010465	+	6376		26	mTSS	ATT	YPK_0005	ybhA-1, ybjI-1, yidA-1, yigL -1	sugar phosphatase	1	0	0	0	0	0	10	1	2	0	2	0	0.15	1.71659e-08							1.3836e-06
YPK_TSS_3	NC_010465	+	11857		113	mTSS	AGG	YPK_0011	ibpA	heat shock protein Hsp20	1	1	0	1	0	1	67	13	8	173	3	15	0.05	9.51512e-75	0	3.44355e-15					0		4.18452e-11	0
YPK_TSS_4	NC_010465	+	12405		259	mTSS	GAT	YPK_0012	ibpB	heat shock protein Hsp20	1	0	0	0	0	0	19	0	4	0	0	0	0	2.28248e-17
YPK_TSS_5	NC_010465	+	24842		39	mTSS	ATT	YPK_0022	glyQ	glycyl-tRNA synthetase, alpha subunit	1	0	0	0	0	0	14	4	7	2	5	0	0.34	1.76199e-06							1.89291e-08		3.68951e-06
YPK_TSS_6	NC_010465	+	28225		122	mTSS	GAT	YPK_0025	yiaF	putative lipoprotein	0	0	0	0	1	0	8	5	1	1	32	2									3.97342e-05
YPK_TSS_7	NC_010465	+	33740		49	mTSS	AAC	YPK_0030	yibL	conserved hypothetical protein	1	0	1	0	1	0	59	7	31	9	11	4									0	0.00892144	0	0.0258089
YPK_TSS_8	NC_010465	-	34969		185	mTSS	AAC	YPK_0031		conserved hypothetical protein	0	0	0	1	0	0	2	5	8	11	2	1							0	2.38222e-11			7.5563e-05
YPK_TSS_9	NC_010465	-	37972		185	mTSS	AGA	YPK_0034	tar	methyl-accepting chemotaxis sensory transducer	1	0	0	0	0	0	17	0	0	0	0	0	0.05	1.1234e-07							0
YPK_TSS_10	NC_010465	-	38809		55	mTSS	TGC	YPK_0035	sodA	superoxide dismutase	1	1	1	0	1	0	185	76	94	9	75	4			0.34	4.12973e-36					0	3.95701e-09	0
YPK_TSS_11	NC_010465	+	40050		160	mTSS	GTG	YPK_0037	fdoG-1	molybdopterin oxidoreductase Fe4S4 region	0	1	1	1	0	0	2	49	13	17	3	1			0.32	1.64727e-19	0.09	0.000204365	0	3.46434e-08		7.36206e-06	0	0.00551382
YPK_TSS_12	NC_010465	+	40067	40066	143	mTSS	AAG	YPK_0037	fdoG-1	molybdopterin oxidoreductase Fe4S4 region	1	1	1	1	1	0	24	79	57	36	10	3									0	1.0827e-14	0	0.000601123
YPK_TSS_13	NC_010465	-	40082		69	mTSS	AGC	YPK_0036	fdhD	formate dehydrogenase family accessory protein FdhD	0	0	1	0	0	0	0	0	11	2	0	1					0.28	0.001275					1.51856e-13
YPK_TSS_14	NC_010465	+	40746		100	mTSS	ATT	YPK_0038	fdoG-2	formate dehydrogenase, alpha subunit	0	0	0	1	0	0	4	11	2	17	1	3							0	5.15258e-12
YPK_TSS_15	NC_010465	+	44528		384	mTSS	GAA	YPK_0041	fdhE	formate dehydrogenase accessory protein FdhE	0	0	1	0	0	0	8	1	15	5	2	1					0.09	5.22958e-06			6.41343e-05		0
YPK_TSS_16	NC_010465	+	50118		24	mTSS	ATG	YPK_0044		conserved hypothetical protein	1	0	1	1	0	0	15	9	12	19	2	1	0.41	4.25502e-09			0.15	8.08974e-10			1.37002e-10	0.00645909	0	0.0104428
YPK_TSS_17	NC_010465	-	52984		73	mTSS	CTG	YPK_0048	mdfA	major facilitator superfamily MFS_1	1	0	1	1	0	0	34	9	21	10	3	3	0.05	2.20364e-37			0.06	1.40005e-23	0	0	0		0
YPK_TSS_18	NC_010465	+	53633		139	mTSS	GCA	YPK_0050		acyltransferase 3	1	1	0	0	0	0	15	10	5	3	1	1	0.16	3.17776e-14	0	8.58202e-11					3.26779e-06		6.97592e-07
YPK_TSS_19	NC_010465	+	71053		24	mTSS	ATA	YPK_0062		conserved hypothetical protein	0	0	0	1	0	0	5	1	2	39	1	0							0.41	2.1698e-11				0.000240595
YPK_TSS_20	NC_010465	-	80575		65	mTSS	TTG	YPK_0071	fhuD-1, fepB-1, fecB-1	periplasmic binding protein	1	0	0	0	0	0	40	2	1	0	1	0									0
YPK_TSS_21	NC_010465	+	84825		58	mTSS	AGC	YPK_0076	hutU	urocanate hydratase	0	0	0	0	1	0	1	0	3	0	14	0											1.40654e-07
YPK_TSS_22	NC_010465	+	92225		90	mTSS	GTG	YPK_0080	eptB	phosphoethanolamine transferase	1	0	1	0	0	0	14	2	10	0	1	0	0	1.99609e-17			0.07	5.32324e-10			1.27933e-10		2.24042e-11
YPK_TSS_23	NC_010465	+	115855		85	mTSS	AAT	YPK_0098	dctA	sodium:dicarboxylate symporter	1	0	1	0	0	0	14	7	15	2	0	0	0.19	1.9744e-12			0.36	9.19231e-08			2.18038e-10		0
YPK_TSS_24	NC_010465	-	120713		33	mTSS	CAA	YPK_0102	praC	4-oxalocrotonate tautomerase family enzyme	0	0	1	0	0	0	7	7	13	0	1	0					0	4.35582e-15			3.1692e-06		0
YPK_TSS_25	NC_010465	+	120820		79	mTSS	AGA	YPK_0103		diguanylate phosphodiesterase	1	0	0	0	0	0	71	2	0	0	0	0									0
YPK_TSS_26	NC_010465	-	138780		140	mTSS	TAA	YPK_0115	rlmJ	23S rRNA (adenine2030-N6)-methyltransferase	1	0	0	0	0	0	13	7	4	0	2	0									6.73609e-08	0.00663612
YPK_TSS_27	NC_010465	+	138880		89	mTSS	TCA	YPK_0116	opdA	oligopeptidase A	1	0	0	0	0	0	20	0	3	1	1	0	0.23	4.62716e-11							0
YPK_TSS_28	NC_010465	-	144861		86	mTSS	CAC	YPK_0119	gdhA	glutamate dehydrogenase (NADP(+))	1	0	0	1	0	0	10	2	4	16	2	1	0.11	6.17051e-08					0	2.51995e-11	3.77537e-10
YPK_TSS_29	NC_010465	-	145567		99	mTSS	GAG	YPK_0120	uspA	UspA domain protein	1	0	1	0	0	0	15	18	26	9	6	1	0.15	3.01591e-10			0.4	1.91277e-07			9.69234e-07		0
YPK_TSS_30	NC_010465	-	145713	145714	245	mTSS	TGA	YPK_0120	uspA	UspA domain protein	0	1	1	1	0	0	8	305	21	82	6	2					0.19	4.4021e-08			0.000199877	4.26456e-11	0	0.000963406
YPK_TSS_31	NC_010465	+	145981		178	mTSS	GGG	YPK_0121	uspB	universal stress protein B	0	1	0	1	1	0	0	163	1	21	13	3			0.38	0.00010109			0	7.27914e-23		0		0.0232422
YPK_TSS_32	NC_010465	-	148166		-70	rmTSS	TTC	YPK_0122	pitA	phosphate transporter	1	0	1	0	0	0	70	0	15	1	1	0	0.19	8.23909e-52			0.15	1.4939e-13			0		1.45538e-11
YPK_TSS_33	NC_010465	+	148352		-90	rmTSS	ACC	YPK_0123	yhiN	HI0933 family protein	1	0	0	0	0	0	10	0	2	0	0	0	0	9.13943e-10							1.68412e-06
YPK_TSS_34	NC_010465	+	159920		-17	rmTSS	GCT	YPK_0132		conserved hypothetical protein	1	0	0	0	0	0	26	2	4	0	0	0	0.11	1.26576e-23							0
YPK_TSS_35	NC_010465	+	161039		86	mTSS	CCC	YPK_0134	gntR	transcriptional regulator, LacI family	1	0	1	0	0	0	18	5	12	5	1	0	0.33	1.95811e-10			0.05	3.50805e-11			3.63946e-09		0
YPK_TSS_36	NC_010465	+	166293		225	mTSS	AAG	YPK_0141	asd-1	aspartate-semialdehyde dehydrogenase	1	1	1	0	1	0	55	13	16	5	18	3			0	2.76132e-13					1.00324e-12		1.67549e-06
YPK_TSS_37	NC_010465	-	188688		57	mTSS	GAA	YPK_0146	yehU, ypdA	signal transduction histidine kinase, LytS	1	1	1	0	0	0	5	7	5	1	2	1			0	2.96788e-08
YPK_TSS_38	NC_010465	+	188954	188955	183	mTSS	TAT	YPK_0147	glgB	1,4-alpha-glucan branching enzyme	0	1	0	1	1	0	1	12	1	43	24	7			0	1.89512e-06			0	3.48445e-42		0.0196576
YPK_TSS_39	NC_010465	-	200730		47	mTSS	AAA	YPK_0152	glpD	FAD dependent oxidoreductase	1	0	1	0	0	0	849	7	17	7	0	0	0.37	0							0		0
YPK_TSS_40	NC_010465	-	208577		121	mTSS	ATG	YPK_0160	malT	ATP-dependent transcriptional regulator, MalT-like, LuxR family	1	1	1	1	0	0	46	43	33	18	0	1	0.11	2.28087e-40	0.15	2.96834e-37	0.29	6.32967e-18	0	4.06384e-18	0	4.43454e-08	0
YPK_TSS_41	NC_010465	+	208595		179	mTSS	ATG	YPK_0161	glgP-2	glycogen/starch/alpha-glucan phosphorylase	0	1	0	0	0	0	7	12	4	1	1	1			0	2.27673e-15					0.000272415
YPK_TSS_42	NC_010465	-	214076		28	mTSS	AGA	YPK_0163	nfuA	IscR-regulated protein YhgI	1	0	1	0	0	0	28	6	18	3	8	1									6.90787e-15		3.03986e-14
YPK_TSS_43	NC_010465	+	215806		36	mTSS	GTT	YPK_0166		protein of unknown function DUF1471	0	1	0	0	1	0	2	91	1	4	23	0			0.43	2.99746e-25						1.32129e-15
YPK_TSS_44	NC_010465	-	219389	219390	213	mTSS	AAT	YPK_0169	feoA	FeoA family protein	1	1	1	0	0	1	10	39	10	31	28	10	0	1.37309e-09	0.1	6.17116e-20	0.1	2.52603e-07			1.49034e-11	8.76222e-16	0	0.00447375
YPK_TSS_45	NC_010465	-	222275		200	mTSS	TCG	YPK_0170	yhgF	RNA binding S1 domain protein	1	1	1	0	0	0	4	5	8	0	0	0					0.36	0.0232168					6.35204e-09
YPK_TSS_46	NC_010465	+	223228		32	mTSS	ATC	YPK_0172	ompR	two component transcriptional regulator, winged helix family	1	0	1	0	0	0	16	0	34	2	3	1									1.65567e-06		0
YPK_TSS_47	NC_010465	-	227314		28	mTSS	GAA	YPK_0174	pckA	phosphoenolpyruvate carboxykinase (ATP)	0	0	1	1	0	0	6	13	42	14	1	0					0.39	5.99993e-17				0.010663	0
YPK_TSS_48	NC_010465	-	227357		71	mTSS	GCT	YPK_0174	pckA	phosphoenolpyruvate carboxykinase (ATP)	0	1	0	0	0	0	2	15	7	5	18	3			0	1.17068e-10						0.010663	8.5454e-15
YPK_TSS_49	NC_010465	-	229202		268	mTSS	CGA	YPK_0176	hslR	RNA-binding S4 domain protein	1	0	0	0	0	0	13	0	1	0	0	0	0.38	4.97358e-07							2.85305e-08
YPK_TSS_50	NC_010465	-	232249		315	mTSS	ATG	YPK_0178		intracellular growth attenuator IgaA	1	1	0	0	1	0	18	11	5	5	14	2	0.13	2.25806e-14							0		0.000157975
YPK_TSS_51	NC_010465	-	237893	237892	172	mTSS	ACA	YPK_0186		conserved hypothetical protein	1	1	0	1	1	0	16	67	7	19	30	4	0	2.67644e-17	0	8.37665e-66					1.08783e-05	0.00485419	8.06819e-07
YPK_TSS_52	NC_010465	-	240894		-54	rmTSS	TGA	YPK_0189		DNA circulation family protein	1	1	1	1	1	0	32	13	35	12	10	8	0.06	4.45661e-37	0	2.46492e-14	0.17	3.28846e-34	0	1.2506e-12	0	0.00583321	0	0.0187127
YPK_TSS_53	NC_010465	-	247143		74	mTSS	ATT	YPK_0201		conserved hypothetical protein	0	0	0	1	0	0	4	2	2	16	1	1							0	4.48559e-19
YPK_TSS_54	NC_010465	+	255316		162	mTSS	GAA	YPK_0218		hypothetical protein YPK_0218	0	0	1	0	0	0	15	8	17	6	3	4					0.06	8.68223e-15			5.11795e-15	0.0250621	0
YPK_TSS_55	NC_010465	+	263223		230	mTSS	GAA	YPK_0225	aroK	shikimate kinase	1	1	1	1	0	0	106	16	77	13	6	1	0.1	1.12855e-68	0.39	0.000541141	0.15	3.71963e-51	0	5.97234e-12	0	0.0200117	0
YPK_TSS_56	NC_010465	+	263346	263347	107	mTSS	CGT	YPK_0225	aroK	shikimate kinase	1	1	1	0	1	0	69	11	30	2	26	7	0.1	1.47534e-28	0	2.27073e-05	0.11	7.09114e-11
YPK_TSS_57	NC_010465	-	275470		24	mTSS	GAA	YPK_0235	nirB	nitrite reductase (NAD(P)H), large subunit	0	0	0	0	1	0	9	8	3	0	15	1									4.8727e-11		4.69121e-08
YPK_TSS_58	NC_010465	-	283699		208	mTSS	TGA	YPK_0241	celF	glycoside hydrolase family 4	0	0	1	0	0	0	1	1	14	4	0	0					0.18	4.31323e-10					6.22088e-12
YPK_TSS_59	NC_010465	+	283968		39	mTSS	GCT	YPK_0242	ppiA	peptidyl-prolyl cis-trans isomerase cyclophilin type	1	0	1	0	0	0	111	4	158	0	1	0	0.26	4.43188e-107			0.33	6.04729e-126			0		0
YPK_TSS_60	NC_010465	-	291876		201	mTSS	AAA	YPK_0248	crp	transcriptional regulator, Crp/Fnr family	1	1	1	1	1	1	124	63	62	31	35	24	0.07	1.29708e-109	0	9.57075e-63	0.08	2.51047e-46			0	3.25459e-05	0	0.00207707
YPK_TSS_61	NC_010465	-	291962		287	mTSS	CAA	YPK_0248	crp	transcriptional regulator, Crp/Fnr family	0	1	0	0	1	0	0	4	0	1	6	2
YPK_TSS_62	NC_010465	+	291986		25	mTSS	GAA	YPK_0249		OsmC family protein	1	0	1	0	0	0	16	4	11	4	8	2					0.25	5.7561e-08			9.96858e-13		0
YPK_TSS_63	NC_010465	-	302551		28	mTSS	TGA	YPK_0262	rafQ	glycosyl transferase family 9	1	0	1	0	1	0	19	8	24	4	26	2	0.06	5.98763e-21			0.19	8.46673e-20			0	0.0103415	0
YPK_TSS_64	NC_010465	+	308613		28	mTSS	AAT	YPK_0268	slyD	peptidylprolyl isomerase FKBP-type	1	0	1	0	0	0	40	3	23	0	1	0									0		0
YPK_TSS_65	NC_010465	-	309675		34	mTSS	GCT	YPK_0269	slyX	SlyX family protein	0	1	1	1	1	1	4	30	22	25	74	27			0.21	5.10896e-16						1.88658e-05	0	0.000454817
YPK_TSS_66	NC_010465	+	309844		112	mTSS	ACT	YPK_0270	fkpA	peptidylprolyl isomerase	0	0	1	0	0	0	3	5	28	3	2	9					0.48	0.00149406					0
YPK_TSS_67	NC_010465	+	309903		53	mTSS	TAC	YPK_0270	fkpA	peptidylprolyl isomerase	1	1	1	1	1	0	92	14	60	10	34	7			0	1.43909e-08					0	0.0151167	0	0.0255576
YPK_TSS_68	NC_010465	+	312342		170	mTSS	GTA	YPK_0274	tusB	sulfur relay protein TusB/DsrH	0	1	1	1	1	1	4	41	26	61	12	76			0	7.58763e-47	0.24	1.51252e-20	0.41	1.68457e-39		0.000626557	0	5.2315e-05
YPK_TSS_69	NC_010465	+	312758		179	mTSS	GTG	YPK_0275	rpsL	30S ribosomal protein S12	0	1	0	0	0	0	5	24	7	1	5	5			0	1.39893e-17						0.000902753	0.000476659
YPK_TSS_70	NC_010465	+	312856		81	mTSS	GTC	YPK_0275	rpsL	30S ribosomal protein S12	1	0	1	0	0	0	581	0	179	0	1	0	0.02	0			0.02	8.83762e-106			0		0
YPK_TSS_71	NC_010465	+	315973		179	mTSS	CTG	YPK_0278	tuf-1	translation elongation factor Tu	1	1	1	1	1	0	337	167	505	89	175	21	0.12	2.60636e-93	0.04	2.778e-146	0.18	3.83067e-169	0	3.46857e-87	0	0	0	6.51618e-07
YPK_TSS_72	NC_010465	+	318161		24	mTSS	ACT	YPK_0280	bfd	bacterioferritin-associated ferredoxin	1	1	0	0	0	0	48	46	0	6	6	1	0.25	2.79984e-34	0	3.64979e-30					0	1.84045e-06
YPK_TSS_73	NC_010465	+	318436		22	mTSS	ACT	YPK_0281	bfr	bacterioferritin	0	1	0	1	1	0	1	85	1	28	51	5										0		1.49047e-06
YPK_TSS_74	NC_010465	+	319168		177	mTSS	GCC	YPK_0282	rpsJ	ribosomal protein S10	1	0	1	0	0	0	26	3	18	0	1	0	0	6.3084e-06			0	2.13683e-06			0		0
YPK_TSS_75	NC_010465	+	324411		74	mTSS	GCC	YPK_0293	rplN	ribosomal protein L14	0	0	1	0	0	0	68	5	92	0	1	0					0.02	8.21698e-33			0		0
YPK_TSS_76	NC_010465	+	329789		113	mTSS	CTC	YPK_0304	rpmJ-1	ribosomal protein L36	1	1	1	0	1	1	510	43	122	2	118	10			0.17	1.44671e-17					0	2.68118e-06	0
YPK_TSS_77	NC_010465	+	333948		36	mTSS	GAT	YPK_0311	arfA	alternative ribosome-rescue factor	1	1	1	0	0	0	15	27	18	9	2	6									7.65498e-11	0.0157932	0	0.0246168
YPK_TSS_78	NC_010465	-	334733		35	mTSS	TTC	YPK_0312	mscL	large conductance mechanosensitive channel protein	1	1	1	0	0	0	17	19	13	4	5	0	0.33	5.39605e-09	0	1.62044e-19	0.12	1.18405e-11			0	0.000249208	0
YPK_TSS_79	NC_010465	-	339183		38	mTSS	AAT	YPK_0316	def	peptide deformylase	0	1	0	0	0	0	3	10	3	2	1	1										0.0100729	0.0126652
YPK_TSS_80	NC_010465	+	340234		139	mTSS	GAG	YPK_0318		protein of unknown function DUF494	1	1	1	1	1	1	20	46	20	27	27	15	0.09	1.28858e-20	0	3.61758e-49	0.04	3.51547e-20	0	2.53191e-25	3.99299e-10	4.10815e-05	0	0.000296897
YPK_TSS_81	NC_010465	-	343457	343458	30	mTSS	AAA	YPK_0322		transferase hexapeptide repeat containing protein	1	1	1	1	0	0	25	12	45	12	6	2	0.28	4.64328e-14	0	6.67081e-09	0.24	3.26283e-20	0	1.878e-12	0	0.000131053	0	0.0230433
YPK_TSS_82	NC_010465	+	349613		29	mTSS	AGA	YPK_0326	murB	UDP-N-acetylenolpyruvoylglucosamine reductase	1	0	1	0	0	0	35	6	37	3	3	1									0		0
YPK_TSS_83	NC_010465	-	352685		65	mTSS	TTT	YPK_0328	coaA	pantothenate kinase	1	0	1	0	0	0	29	9	16	4	0	0	0.13	1.14247e-22			0.4	1.79543e-05			0	0.0161921	0
YPK_TSS_84	NC_010465	+	354305		66	mTSS	ATT	YPK_0332	tuf-2	translation elongation factor Tu	1	1	1	0	1	0	259	121	650	6	151	7			0.18	4.00055e-52	0.5	0			0	0	0
YPK_TSS_85	NC_010465	+	355662		144	mTSS	GAT	YPK_0333	secE	preprotein translocase, SecE subunit	1	1	1	0	1	1	66	25	47	5	66	22			0.39	0.000689057					0	3.88872e-05	0
YPK_TSS_86	NC_010465	+	356803		124	mTSS	GCC	YPK_0335	rplK	ribosomal protein L11	1	1	1	0	0	0	1266	19	288	4	3	1	0.02	0	0	7.86495e-13	0.03	3.2462e-206			0		0
YPK_TSS_87	NC_010465	+	358424		4	lmTSS	ACT	YPK_0337	rplJ	ribosomal protein L10	0	1	0	1	0	1	82	87	151	12	19	23			0.36	2.9082e-06			0	3.27511e-10	2.05633e-05	0	0
YPK_TSS_88	NC_010465	-	374969		53	mTSS	GCT	YPK_0348	rsd	regulator of RpoD, Rsd/AlgQ	0	1	0	0	0	0	6	14	3	0	2	1			0	9.05778e-09					0.00014586		0.000385337
YPK_TSS_89	NC_010465	+	378640		35	mTSS	ACT	YPK_0353	yjaG	protein of unknown function DUF416	1	1	1	0	0	0	20	11	28	2	5	0	0.24	2.27348e-09	0	7.40042e-10	0.13	1.76268e-20			4.51792e-15	0.00970994	0
YPK_TSS_90	NC_010465	+	379310		144	mTSS	CTT	YPK_0354	hupA	histone family protein DNA-binding protein	1	0	1	0	0	0	39	6	48	1	9	4									0		0
YPK_TSS_91	NC_010465	+	379347		107	mTSS	GCG	YPK_0354	hupA	histone family protein DNA-binding protein	1	1	1	1	1	1	290	118	318	57	28	10	0.07	0	0	1.25745e-115	0.08	0			0	0	0	6.59438e-06
YPK_TSS_92	NC_010465	+	391544		128	mTSS	GTC	YPK_0364	aceB	malate synthase A	0	1	0	0	0	0	0	18	1	9	1	3			0	6.41484e-19								0.0155277
YPK_TSS_93	NC_010465	-	397609		40	mTSS	CGA	YPK_0367	iclR	transcriptional regulator, IclR family	0	1	0	1	0	0	1	23	2	20	2	1			0.34	2.14571e-11			0	2.92108e-17		0.000666094		0.0252874
YPK_TSS_94	NC_010465	+	397734		50	mTSS	TTT	YPK_0368	metH	methionine synthase	1	1	1	0	0	0	5	3	7	0	1	0			0	2.88479e-05							1.62877e-08
YPK_TSS_95	NC_010465	+	407017		33	mTSS	TTC	YPK_0373	pgi	glucose-6-phosphate isomerase	1	0	0	0	0	0	16	3	7	0	4	0									0.000187855		6.36248e-13
YPK_TSS_96	NC_010465	+	451718		494	mTSS	ACG	YPK_0411		conserved hypothetical protein	0	1	1	1	0	0	9	18	12	22	3	9			0	1.78065e-22	0.1	8.9104e-14				0.00733339	2.37306e-05	0.0091059
YPK_TSS_97	NC_010465	+	468103		67	mTSS	GAT	YPK_0428	yjcE	Na+/H+ antiporter	1	0	1	0	0	0	20	5	27	1	0	2	0	3.61515e-24			0.04	6.47003e-32			1.78695e-12		0
YPK_TSS_98	NC_010465	-	472494		199	mTSS	AAA	YPK_0430	ddg	lipid A biosynthesis lauroyl (or palmitoleoyl) acyltransferase	1	0	0	0	0	0	13	8	7	5	2	1	0.21	8.47344e-14							6.70164e-05
YPK_TSS_99	NC_010465	+	472998		104	mTSS	GTG	YPK_0431	yphF-1, ytfQ-1	carbohydrate uptake (CUT2 family) ABC transporter, periplasmic carbohydrate-binding protein	1	1	1	0	0	0	17	29	52	6	1	0	0.23	1.52213e-11	0	8.94098e-32	0.25	3.50008e-27			0	0.00030355	0
YPK_TSS_100	NC_010465	-	483896		33	mTSS	TTC	YPK_0440		conserved hypothetical protein	0	0	1	0	0	0	7	2	18	3	1	0									1.59599e-10		0
YPK_TSS_101	NC_010465	-	485535		179	mTSS	TCG	YPK_0444	cspA-3	cold-shock DNA-binding domain protein	1	1	1	1	1	1	99	303	10	59	10	12	0.24	9.34311e-82					0	1.40979e-66	0	0	6.06305e-08	0.000346737
YPK_TSS_102	NC_010465	-	486389		32	mTSS	TTC	YPK_0445	pcp-1	17 kDa surface antigen	0	1	0	0	1	0	9	18	6	8	11	5			0	3.55752e-12						0.0261309	0.00150779
YPK_TSS_103	NC_010465	-	486481	486480	124	mTSS	AAC	YPK_0445	pcp-1	17 kDa surface antigen	1	1	1	1	1	0	40	27	23	22	10	4	0.19	7.01888e-31	0	1.18734e-20	0.21	2.78778e-09	0	1.62081e-23
YPK_TSS_104	NC_010465	+	486727		106	mTSS	CAA	YPK_0446		beta-lactamase domain protein	0	1	0	1	0	0	1	17	9	107	8	2			0.46	1.11362e-08			0.2	9.235e-78		0.014727	3.83939e-10	1.76224e-12
YPK_TSS_105	NC_010465	+	488672		120	mTSS	ATT	YPK_0448	pcaC-1	carboxymuconolactone decarboxylase	0	0	0	1	0	0	0	1	0	19	0	0												0.0102199
YPK_TSS_106	NC_010465	-	494083	494084	32	mTSS	CTT	YPK_0453	dusB	tRNA-dihydrouridine synthase B	1	1	1	0	0	0	57	14	31	1	7	1	0.4	2.77449e-15	0	1.46781e-15	0.24	3.4797e-21			0	0.0138597	0
YPK_TSS_107	NC_010465	-	495796		275	mTSS	AGC	YPK_0454	prmA	ribosomal protein L11 methyltransferase	0	1	1	1	0	0	8	11	10	16	3	1			0	0	0.08	1.7321e-09	0	0		0.00870057	5.36174e-12
YPK_TSS_108	NC_010465	-	501230		30	mTSS	ATG	YPK_0460	aroQ	3-dehydroquinate dehydratase, type II	1	0	1	1	0	0	70	8	84	11	6	3	0.17	9.18021e-18			0.25	4.50973e-26			0		0	0.0365454
YPK_TSS_109	NC_010465	-	503277		95	mTSS	ACC	YPK_0462	yedY	oxidoreductase molybdopterin binding	0	0	1	0	0	0	6	2	10	9	0	1					0.33	0.00046402					5.46146e-12
YPK_TSS_110	NC_010465	+	504622		161	mTSS	AGA	YPK_0464	yhdA	diguanylate cyclase/phosphodiesterase	0	1	0	0	0	0	0	10	0	2	2	0			0	1.71574e-09
YPK_TSS_111	NC_010465	+	506993		43	mTSS	GAT	YPK_0465	mreB	cell shape determining protein, MreB/Mrl family	1	0	1	0	0	0	20	2	27	1	1	0					0.41	8.80766e-05			0		0
YPK_TSS_112	NC_010465	-	535761		177	mTSS	ATT	YPK_0482		transcriptional regulator, LysR family	0	0	0	1	0	0	0	5	0	13	2	1												0.0087427
YPK_TSS_113	NC_010465	+	539049	539048	208	mTSS	GGT	YPK_0486	gabD-1	succinic semialdehyde dehydrogenase	1	1	1	1	1	1	14	43	57	29	17	39	0	1.17096e-14			0.06	2.84384e-47			3.58968e-12	0.0128348	0	3.77821e-05
YPK_TSS_114	NC_010465	+	542412		93	mTSS	ATG	YPK_0490	pmbA	peptidase U62 modulator of DNA gyrase	1	0	1	0	0	0	24	9	12	3	5	2	0.43	5.39824e-15							2.56758e-10		0
YPK_TSS_115	NC_010465	-	542418		94	mTSS	CGC	YPK_0489	yjgA	ribosome-associated protein	0	1	1	0	0	0	7	10	14	9	5	0			0	2.25829e-11	0.2	2.78735e-09			0.000458566		1.69754e-09
YPK_TSS_116	NC_010465	-	545926		77	mTSS	TAT	YPK_0493	rnk	GreA/GreB family elongation factor	0	0	1	0	0	0	15	8	10	4	1	2					0.31	0.0132857			6.62507e-07		0
YPK_TSS_117	NC_010465	-	545935		86	mTSS	ACA	YPK_0493	rnk	GreA/GreB family elongation factor	1	1	0	0	0	0	19	12	8	2	0	0	0.12	1.23587e-09							0		6.33061e-05
YPK_TSS_118	NC_010465	-	549589		216	mTSS	AAA	YPK_0495	treB	PTS system, trehalose-specific IIBC subunit	0	1	0	0	1	0	1	4	0	0	200	0			0	0.000816058
YPK_TSS_119	NC_010465	-	549641		268	mTSS	GTT	YPK_0495	treB	PTS system, trehalose-specific IIBC subunit	0	0	1	0	0	0	6	4	23	2	0	0					0	3.55393e-21					0
YPK_TSS_120	NC_010465	-	551606		159	mTSS	CGG	YPK_0497		conserved hypothetical protein	1	1	0	0	1	0	18	14	7	1	63	0	0.11	9.36151e-10	0	3.95292e-11					3.08041e-08		0.000341425
YPK_TSS_121	NC_010465	-	552178		46	mTSS	ATC	YPK_0498	tdcF, ridA	endoribonuclease L-PSP	1	1	1	0	0	0	133	25	86	6	4	1			0	4.53489e-25					0	0.0103077	0
YPK_TSS_122	NC_010465	-	553926		245	mTSS	ATT	YPK_0500	pyrB	aspartate carbamoyltransferase	1	0	1	0	0	0	26	1	13	0	0	0	0.43	6.54274e-12			0.21	3.59817e-05			0		0
YPK_TSS_123	NC_010465	-	562958		98	mTSS	TAA	YPK_0511	yrbG	Na+/Ca+ antiporter, CaCA family	1	1	0	1	0	0	20	39	3	27	5	3	0.08	2.11832e-20	0.38	4.89393e-21			0	2.17114e-32	0	4.93768e-07		0.0027883
YPK_TSS_124	NC_010465	+	563087		38	mTSS	ACG	YPK_0512	mlaF	ABC transporter related	1	1	1	0	0	0	11	14	12	6	2	1	0.11	7.93638e-09	0.34	3.56955e-05	0.09	1.3026e-11			6.39807e-08	0.000432251	1.85436e-08	0.0119103
YPK_TSS_125	NC_010465	-	569591		-37	rmTSS	CCC	YPK_0519	degS	periplasmic serine protease DegS	1	0	0	0	0	0	10	13	6	4	3	0	0.21	6.17217e-07							8.22509e-05	0.00745211	1.57187e-08
YPK_TSS_126	NC_010465	-	571756	571755	53	mTSS	ATT	YPK_0521	yhcB	protein of unknown function DUF1043	1	0	1	1	0	0	13	4	15	10	3	1							0	7.55014e-07
YPK_TSS_127	NC_010465	+	573112		256	mTSS	GCG	YPK_0524	rplM	ribosomal protein L13	1	0	0	0	0	0	13	0	4	0	1	0	0	0.00107664							5.06265e-07		0.010411
YPK_TSS_128	NC_010465	+	573206	573205	162	mTSS	ACC	YPK_0524	rplM	ribosomal protein L13	1	1	1	1	0	0	177	39	92	12	20	8	0.01	1.70151e-65	0	7.84351e-35	0.01	1.02715e-42	0	8.13222e-10	0	0.00970539	0	0.0230084
YPK_TSS_129	NC_010465	+	574395		182	mTSS	CAC	YPK_0526	sspA	glutathione S-transferase domain	1	1	1	0	1	0	110	30	94	4	22	2	0.15	1.22132e-56	0	1.45581e-26	0.23	1.9015e-47			0	0.000572887	0
YPK_TSS_130	NC_010465	-	583100		238	mTSS	CGC	YPK_0530	gltB	glutamate synthase (ferredoxin)	1	0	1	1	1	0	21	36	10	16	10	3	0.1	1.95523e-21			0.1	2.52555e-09	0	0	0	0.00179704	0	0.0427763
YPK_TSS_131	NC_010465	+	584869		23	mTSS	GAT	YPK_0533	arcB	multi-sensor hybrid histidine kinase	0	0	1	1	0	0	6	5	11	14	1	0					0.13	1.32534e-09	0	5.99328e-16	7.23879e-08		0
YPK_TSS_132	NC_010465	+	587174		296	mTSS	GCG	YPK_0534	elbB	ThiJ/PfpI domain protein	0	1	0	0	0	0	1	18	3	3	4	3			0	2.82179e-15						0.0005241
YPK_TSS_133	NC_010465	-	589845		218	mTSS	GTC	YPK_0536		transport-associated	0	0	0	1	0	0	9	9	7	15	2	1							0	3.73789e-17	2.22614e-08		7.78021e-09	0.0322734
YPK_TSS_134	NC_010465	-	592953		29	mTSS	TCT	YPK_0539		LppC family lipoprotein	0	0	1	0	0	0	9	2	10	3	3	2					0.13	2.43798e-08			1.81848e-07		1.28367e-12
YPK_TSS_135	NC_010465	-	593522		598	mTSS	AGC	YPK_0539		LppC family lipoprotein	1	1	1	1	1	1	3	18	6	6	3	3					0	3.90322e-08				0.00444304
YPK_TSS_136	NC_010465	+	595421		29	mTSS	ATA	YPK_0542		transcriptional regulator, LysR family	1	0	0	0	0	0	14	1	2	2	0	1	0.15	8.7088e-14							1.09598e-07
YPK_TSS_137	NC_010465	-	598058		117	mTSS	CCC	YPK_0544	yphA, yqjF	putative oxidoreductase	0	1	0	1	0	1	1	27	3	34	15	30			0.23	4.83729e-14			0	3.14035e-37		1.95467e-05		0.0415803
YPK_TSS_138	NC_010465	-	598086		145	mTSS	TCA	YPK_0544	yphA, yqjF	putative oxidoreductase	1	1	1	1	1	0	4	6	3	8	11	2	0.43	0.00506276	0	0.00348939			0	2.49576e-05			2.18629e-05	0.0415803
YPK_TSS_139	NC_010465	-	599259		30	mTSS	CAC	YPK_0547		protein of unknown function DUF883 ElaB	1	1	1	1	1	1	170	402	368	84	395	65	0.29	4.80714e-96	0.23	0	0.28	2.13694e-162			0	0	0	6.57231e-08
YPK_TSS_140	NC_010465	-	599774		10	mTSS	CAC	YPK_0548		protein of unknown function DUF1090	0	1	0	0	1	0	1	45	9	6	12	3										0.000205044	4.27642e-06
YPK_TSS_141	NC_010465	-	599854		90	mTSS	CAC	YPK_0548		protein of unknown function DUF1090	0	1	0	0	0	0	1	59	1	5	12	4			0.41	6.39699e-23						7.26953e-07
YPK_TSS_142	NC_010465	-	599883	599884	119	mTSS	CAG	YPK_0548		protein of unknown function DUF1090	1	0	1	0	1	0	19	6	13	9	11	2	0.44	1.91346e-07									1.16092e-12
YPK_TSS_143	NC_010465	-	601924		40	mTSS	CTT	YPK_0551		putative lipoprotein	1	1	1	1	1	1	52	39	34	10	84	10	0.09	8.97444e-56	0	9.80827e-45	0.05	2.33699e-36	0	1.85713e-11	0	8.40266e-07	0
YPK_TSS_144	NC_010465	-	603012	603013	85	mTSS	TTG	YPK_0552	exuR	regulatory protein GntR HTH	1	1	1	1	0	0	22	60	22	22	7	2									0	0.000125106	0
YPK_TSS_145	NC_010465	-	612060		192	mTSS	CAA	YPK_0558	sstT	sodium:dicarboxylate symporter	1	1	1	1	0	0	32	65	67	57	1	0	0.03	2.34793e-33	0	9.87243e-58	0	4.75828e-67	0	4.96763e-47	0	6.19145e-09	0	2.82954e-06
YPK_TSS_146	NC_010465	-	612110		242	mTSS	TTT	YPK_0558	sstT	sodium:dicarboxylate symporter	0	0	0	1	0	0	0	7	2	13	0	0
YPK_TSS_147	NC_010465	-	621187		92	mTSS	ATA	YPK_0563	fadH	NADH:flavin oxidoreductase/NADH oxidase	0	0	0	1	0	0	0	4	5	33	0	0											7.14521e-08	0.0152478
YPK_TSS_148	NC_010465	-	621920	621919	43	mTSS	AGT	YPK_0564	hdeD	acid-resistance membrane protein	1	1	1	1	1	1	93	30	267	265	52	32										2.20902e-05
YPK_TSS_149	NC_010465	-	644292		8	lmTSS	ATG	YPK_0583	yapF	outer membrane autotransporter barrel domain protein	0	1	0	0	1	0	0	21	0	3	14	4			0	0
YPK_TSS_150	NC_010465	-	663765		82	mTSS	TAC	YPK_0598		conserved hypothetical protein	0	1	0	0	0	0	1	10	0	0	0	0			0	0
YPK_TSS_151	NC_010465	+	664406		43	mTSS	GTG	YPK_0599		aminotransferase class I and II	0	0	1	0	0	0	1	0	8	0	0	0											0
YPK_TSS_152	NC_010465	+	672351		48	mTSS	AGC	YPK_0608	fic	filamentation induced by cAMP protein Fic	0	1	1	0	0	0	6	10	10	8	1	2											6.39906e-10
YPK_TSS_153	NC_010465	-	673188	673189	20	mTSS	AAA	YPK_0609		conserved hypothetical protein	1	1	1	1	1	1	17	17	86	13	10	20	0.2	4.44471e-06			0.35	6.60882e-76			0	4.80521e-08	0	1.71057e-09
YPK_TSS_154	NC_010465	+	676595		64	mTSS	ACC	YPK_0614		integrase family protein	0	1	1	0	0	0	8	11	17	6	1	1			0	4.3177e-12	0	5.45715e-20					0
YPK_TSS_155	NC_010465	-	685898		-47	rmTSS	GAA	YPK_0625		hypothetical protein YPK_0625	0	1	1	0	1	0	9	10	10	5	16	7					0.27	7.18924e-06			1.55618e-08	0.00665309	1.58985e-12
YPK_TSS_156	NC_010465	+	689091		35	mTSS	TGC	YPK_0631		hypothetical protein YPK_0631	0	1	0	0	0	0	0	11	2	0	0	0			0	1.51248e-10						0.0111964
YPK_TSS_157	NC_010465	-	693150		156	mTSS	CAC	YPK_0634	rpoD	RNA polymerase, sigma 70 subunit, RpoD	0	0	1	0	0	0	17	8	24	4	3	1					0.34	0.000989784			2.06257e-10		0
YPK_TSS_158	NC_010465	-	693215		221	mTSS	TTA	YPK_0634	rpoD	RNA polymerase, sigma 70 subunit, RpoD	1	1	1	1	1	1	58	33	23	25	26	10	0.33	1.75876e-14	0	2.72939e-21			0.24	6.95429e-10	0	1.94815e-07	0	0.00253897
YPK_TSS_159	NC_010465	-	693320		326	mTSS	GAG	YPK_0634	rpoD	RNA polymerase, sigma 70 subunit, RpoD	0	0	0	1	0	0	2	0	0	12	0	0							0	1.19085e-06
YPK_TSS_160	NC_010465	-	693445		451	mTSS	TTG	YPK_0634	rpoD	RNA polymerase, sigma 70 subunit, RpoD	0	1	0	0	0	0	1	22	3	5	3	5			0	3.14124e-11						0.0204935
YPK_TSS_161	NC_010465	-	693533		539	mTSS	CTA	YPK_0634	rpoD	RNA polymerase, sigma 70 subunit, RpoD	0	1	0	1	1	0	1	71	3	18	15	5			0	1.50934e-64			0	2.44579e-11		0		0.0351109
YPK_TSS_162	NC_010465	-	695314		63	mTSS	CCA	YPK_0636	rpsU	ribosomal protein S21	1	1	1	1	1	0	879	39	208	27	21	2	0.3	0	0	1.46241e-28	0.12	6.61316e-153	0	7.97194e-25	0	1.44549e-07	0	0.0153646
YPK_TSS_163	NC_010465	-	695433	695432	182	mTSS	CCG	YPK_0636	rpsU	ribosomal protein S21	1	1	0	0	0	0	10	14	6	2	4	1	0	0.00514441	0	2.66723e-06						0.0307751
YPK_TSS_164	NC_010465	+	695633		24	mTSS	CGC	YPK_0637	gcp	metalloendopeptidase, glycoprotease family	1	0	0	0	0	0	18	1	8	1	3	3									8.44692e-10		1.53427e-11
YPK_TSS_165	NC_010465	-	697552		41	mTSS	TGT	YPK_0638		protein of unknown function DUF205	1	0	0	0	0	0	18	8	7	1	4	1	0.25	2.97394e-14							1.15078e-10		5.92779e-09
YPK_TSS_166	NC_010465	+	697570		49	mTSS	ATT	YPK_0639	folB	dihydroneopterin aldolase	1	0	1	0	0	0	11	2	13	0	2	1									2.39794e-07		7.32338e-12
YPK_TSS_167	NC_010465	+	698064		188	mTSS	ATC	YPK_0640	uppP	undecaprenol kinase	0	0	0	0	1	0	9	2	6	3	16	3									8.95144e-09		1.06775e-09
YPK_TSS_168	NC_010465	-	701351		27	mTSS	TAA	YPK_0642	ygiM	SH3 domain protein	1	0	0	0	0	0	14	0	9	2	2	2	0.38	0.0189667							0		0.000257662
YPK_TSS_169	NC_010465	-	709451		31	mTSS	AGT	YPK_0647		protein of unknown function DUF526	1	1	1	1	1	0	47	28	55	14	19	5	0.2	1.26864e-35	0	1.36919e-31			0.34	0.00177749	0	0.000598871	0	0.000627513
YPK_TSS_170	NC_010465	+	709558		432	mTSS	GCT	YPK_0649	ribB	3,4-dihydroxy-2-butanone 4-phosphate synthase	1	1	1	1	1	1	443	347	268	99	72	14	0	0	0	0	0.01	0	0.17	2.73598e-87	0	0	0	4.37557e-13
YPK_TSS_171	NC_010465	-	714069		45	mTSS	CTT	YPK_0652		conserved hypothetical protein	1	1	1	1	1	1	103	257	92	229	59	14	0.49	1.47342e-46							0	0	0	0
YPK_TSS_172	NC_010465	-	715772		53	mTSS	ATT	YPK_0654	tolC	type I secretion outer membrane protein, TolC family	1	0	1	0	0	0	46	12	28	4	10	1	0.49	1.19794e-29			0.15	5.15483e-17			2.83623e-14		1.90838e-09
YPK_TSS_173	NC_010465	-	715838		119	mTSS	AAT	YPK_0654	tolC	type I secretion outer membrane protein, TolC family	1	1	1	1	1	0	4	7	4	8	4	1							0	3.21644e-06			2.24843e-07
YPK_TSS_174	NC_010465	-	722312		62	mTSS	TTC	YPK_0661	mdaB	putative modulator of drug activity	1	0	1	0	0	0	12	0	14	0	1	0	0.22	1.08996e-10			0.24	3.46193e-08			5.21806e-11		0
YPK_TSS_175	NC_010465	+	722476		78	mTSS	AGA	YPK_0662	parC	DNA topoisomerase IV, A subunit	1	0	1	0	0	0	30	7	19	0	6	2									0		0
YPK_TSS_176	NC_010465	+	724935		199	mTSS	GCA	YPK_0663	plsC	1-acyl-sn-glycerol-3-phosphate acyltransferase	1	0	0	0	1	0	5	1	1	1	5	0	0	0.000711774
YPK_TSS_177	NC_010465	+	725097		37	mTSS	GGT	YPK_0663	plsC	1-acyl-sn-glycerol-3-phosphate acyltransferase	1	0	0	0	0	0	12	2	3	3	0	0	0	3.08766e-11							2.53492e-06		1.15129e-05
YPK_TSS_178	NC_010465	-	732681		147	mTSS	ACA	YPK_0668	yqhD	iron-containing alcohol dehydrogenase	0	1	0	0	0	0	0	12	3	7	2	1			0	4.96836e-12
YPK_TSS_179	NC_010465	-	734618		40	mTSS	CCA	YPK_0670		SNARE associated Golgi protein	0	1	0	0	0	0	8	13	9	9	5	0									2.16618e-06		5.35547e-09	0.0377083
YPK_TSS_180	NC_010465	+	736417		45	mTSS	TGA	YPK_0672	exbB	TonB-system energizer ExbB	1	0	0	0	0	0	25	2	6	0	1	0									0		0.000159059
YPK_TSS_181	NC_010465	-	764127		46	mTSS	CAG	YPK_0700		lipoprotein	0	1	0	0	0	0	0	15	1	10	8	2
YPK_TSS_182	NC_010465	+	790269		39	mTSS	CAA	YPK_0732		conserved hypothetical protein	0	1	0	0	0	0	1	13	0	5	2	2										0.00298503
YPK_TSS_183	NC_010465	-	792348		44	mTSS	CCG	YPK_0736	slyB-1	17 kDa surface antigen	1	1	1	1	0	0	18	26	37	18	3	4	0.1	3.13862e-19			0	5.12072e-41	0	2.43911e-18	4.91719e-11	0.000618851	0	0.0321054
YPK_TSS_184	NC_010465	+	796369		139	mTSS	AGA	YPK_0738		efflux transporter, RND family, MFP subunit	1	0	0	0	0	0	12	7	4	2	4	1	0.19	5.90143e-10							2.24676e-10		1.22023e-08
YPK_TSS_185	NC_010465	+	857937		34	mTSS	CAA	YPK_0762	gntP	gluconate transporter	0	0	0	1	0	0	0	3	3	38	0	0							0.13	1.14814e-27			1.94222e-05	1.16631e-07
YPK_TSS_186	NC_010465	-	883281		78	mTSS	ATA	YPK_0778	SLC13A2_3_5	anion transporter	0	0	0	1	0	0	0	0	0	11	0	0							0	6.47544e-07
YPK_TSS_187	NC_010465	-	936751		314	mTSS	GCC	YPK_0819	yggX	probable Fe(2+)-trafficking protein	1	1	1	0	0	0	31	14	38	7	6	2	0.26	1.52677e-17	0.39	8.32322e-06					0	0.00737611	0
YPK_TSS_188	NC_010465	+	938045		98	mTSS	ACC	YPK_0821	trmB	tRNA (guanine-N(7)-)-methyltransferase	1	0	0	0	1	0	17	9	4	7	13	2	0.06	7.48934e-14							0	0.0153156	9.32066e-06
YPK_TSS_189	NC_010465	-	959037		87	mTSS	TTT	YPK_0835	aguB	N-carbamoylputrescine amidase	0	1	0	0	0	0	7	10	3	1	2	0			0	1.71833e-08					0.000528936	0.00828247	1.6009e-07
YPK_TSS_190	NC_010465	-	960153		38	mTSS	TTC	YPK_0837	algH	putative transcriptional regulator	1	0	0	0	0	0	23	6	9	0	1	0	0.25	8.32572e-12							0		0
YPK_TSS_191	NC_010465	-	965207		282	mTSS	CAG	YPK_0843	metK	methionine adenosyltransferase	1	0	0	0	0	0	71	8	4	0	3	0	0.24	1.45022e-37							0		2.23977e-09
YPK_TSS_192	NC_010465	+	965363		380	mTSS	GCG	YPK_0844		hypothetical protein YPK_0844	1	0	1	0	0	0	28	4	18	0	0	0	0.09	4.32237e-22			0	3.22945e-17			0		2.39154e-11
YPK_TSS_193	NC_010465	-	970589		42	mTSS	CTT	YPK_0849	ycaL, loiP	peptidase M48 Ste24p	1	0	1	0	0	0	41	2	31	1	2	0	0.15	8.91429e-30			0.37	1.49629e-12			0		0
YPK_TSS_194	NC_010465	+	970799		222	mTSS	AAT	YPK_0850	tktA	transketolase	1	0	1	0	0	0	24	9	14	7	7	2	0.27	1.08849e-12			0.1	1.59069e-07			1.46319e-07		0.000248427
YPK_TSS_195	NC_010465	+	970845		176	mTSS	GTG	YPK_0850	tktA	transketolase	0	0	1	0	0	0	8	0	17	0	0	0					0.04	4.67877e-08			0.00114589		0
YPK_TSS_196	NC_010465	+	970987		34	mTSS	TTG	YPK_0850	tktA	transketolase	1	0	0	0	0	0	51	0	32	0	1	0	0.21	9.43868e-21							0		0
YPK_TSS_197	NC_010465	+	973375		55	mTSS	ACG	YPK_0851	epd	D-erythrose-4-phosphate dehydrogenase	1	1	1	1	0	0	15	69	23	30	6	2	0.3	2.58349e-10	0	4.08814e-76	0.08	1.0729e-16	0	1.03916e-33	4.64e-07	2.40711e-12	0	0.0120514
YPK_TSS_198	NC_010465	+	974264		285	mTSS	ACG	YPK_0852	pgk	phosphoglycerate kinase	1	1	1	0	0	0	15	12	13	9	7	3	0.24	2.3754e-09			0.24	1.04022e-05				0.0106798	3.66356e-08
YPK_TSS_199	NC_010465	+	974440		109	mTSS	TTT	YPK_0852	pgk	phosphoglycerate kinase	1	1	1	0	0	0	10	14	10	3	4	1			0	1.69448e-07					4.14832e-09		3.57828e-16
YPK_TSS_200	NC_010465	+	979136		114	mTSS	GTT	YPK_0856	yggE	protein of unknown function DUF541	0	0	1	0	0	0	1	9	16	2	3	3					0.05	1.18141e-12				0.00526088	0
YPK_TSS_201	NC_010465	-	981000		31	mTSS	TCG	YPK_0857	iciA	transcriptional regulator, LysR family	0	1	0	0	0	0	7	21	2	3	9	1			0.27	1.71252e-12						0.000327937
YPK_TSS_202	NC_010465	+	981276	981278	35	mTSS	GCT	YPK_0858	rpiA-1	ribose 5-phosphate isomerase	1	1	1	1	0	0	10	11	30	14	6	2	0	0.000312718	0	2.86902e-05	0.1	6.41331e-10	0	1.48696e-12	3.08354e-07	0.0169617	0
YPK_TSS_203	NC_010465	+	982211		63	mTSS	GTG	YPK_0859	serA-1	D-isomer specific 2-hydroxyacid dehydrogenase NAD-binding	0	0	1	0	0	0	9	5	15	0	1	1					0	2.24329e-15			8.44432e-07		0
YPK_TSS_204	NC_010465	-	985358		289	mTSS	AGA	YPK_0861	zapA	Z-ring-associated protein	1	1	1	1	1	0	77	56	64	22	20	6									0	7.57098e-09	0	0.0215267
YPK_TSS_205	NC_010465	+	985376	985375	30	mTSS	AAC	YPK_0862	ygfB	YecA family protein	1	0	1	0	0	0	21	6	18	6	5	3									3.53925e-08		5.39575e-10
YPK_TSS_206	NC_010465	+	990637		177	mTSS	GTT	YPK_0867	gcvT	glycine cleavage system T protein	1	0	1	0	0	0	12	0	81	1	0	0	0.13	3.0273e-11			0.06	3.48104e-67			3.37939e-09		0
YPK_TSS_207	NC_010465	+	1000794		97	mTSS	ACT	YPK_0873	yqfA, hlyIII	channel protein, hemolysin III family	1	0	0	0	0	0	14	9	2	3	2	0	0	5.82136e-17							4.61437e-11
YPK_TSS_208	NC_010465	-	1003479		33	mTSS	TTA	YPK_0875		conserved hypothetical protein	0	0	1	0	0	0	9	5	14	0	2	0											8.44468e-08
YPK_TSS_209	NC_010465	+	1038254	1038255	27	mTSS	TGA	YPK_0920	xerD	tyrosine recombinase XerD	1	0	1	1	0	0	10	8	11	13	5	1					0.27	3.38134e-05	0	3.22267e-14	2.2672e-06		0
YPK_TSS_210	NC_010465	+	1041779		233	mTSS	AGA	YPK_0923	prfB	peptide chain release factor 2	0	1	0	0	0	0	9	14	8	8	3	5			0	9.14091e-07					2.5611e-05	0.00127256	2.27124e-08
YPK_TSS_211	NC_010465	+	1041800		212	mTSS	TCT	YPK_0923	prfB	peptide chain release factor 2	1	1	1	0	1	0	128	54	97	9	22	9	0.09	1.78244e-92	0.18	4.7352e-28	0.14	1.09413e-56			0	2.41448e-12	0
YPK_TSS_212	NC_010465	-	1078179		31	mTSS	ATG	YPK_0962		hypothetical protein	0	1	0	1	0	0	0	12	4	20	0	0			0.46	0.00225197			0	1.08579e-21		0.00542716		0.0308603
YPK_TSS_213	NC_010465	-	1103277		26	mTSS	GAA	YPK_0982	gatY	class II aldolase, tagatose bisphosphate family	1	0	0	0	0	0	12	0	2	0	0	0	0	3.04451e-11							6.69472e-07
YPK_TSS_214	NC_010465	+	1127643		55	mTSS	GCC	YPK_1001	cynT, can	carbonic anhydrase	0	1	0	0	0	0	1	79	3	4	0	0			0	8.29071e-80						0
YPK_TSS_215	NC_010465	+	1158291		102	mTSS	AAG	YPK_1030		conserved hypothetical protein	1	1	0	1	1	0	10	20	3	21	14	3	0.22	8.97183e-08	0	2.47775e-21					1.10631e-10	0.0112269
YPK_TSS_216	NC_010465	-	1160191		130	mTSS	GGC	YPK_1031	tas	aldo/keto reductase	0	0	1	0	0	0	7	2	12	5	2	0					0.29	1.75247e-08					1.25423e-12
YPK_TSS_217	NC_010465	+	1164804		48	mTSS	ACC	YPK_1035	lgt	prolipoprotein diacylglyceryl transferase	1	0	1	0	0	0	28	4	18	1	2	1	0.06	4.81141e-27			0.08	1.09911e-13			0		0
YPK_TSS_218	NC_010465	+	1172305		85	mTSS	GTG	YPK_1042	ptrA	peptidase M16 domain protein	0	0	1	0	0	0	8	1	22	0	3	0					0.34	1.2575e-08			1.52482e-09		0
YPK_TSS_219	NC_010465	+	1184722		32	mTSS	GTA	YPK_1047	mltA	MltA domain protein	1	0	1	0	0	0	16	3	13	1	1	0	0.23	1.97663e-10			0.08	1.20927e-12			0		1.39032e-10
YPK_TSS_220	NC_010465	-	1195623		30	mTSS	TTG	YPK_1057	queF	7-cyano-7-deazaguanine reductase	1	0	0	0	0	0	12	3	5	2	4	2									5.15291e-05		6.91358e-06
YPK_TSS_221	NC_010465	+	1196938		46	mTSS	GTT	YPK_1059		protein of unknown function DUF446	0	0	1	0	0	0	4	0	13	0	0	0					0.16	7.50027e-05					0
YPK_TSS_222	NC_010465	-	1200127		134	mTSS	TTT	YPK_1063	dapD	2,3,4,5-tetrahydropyridine-2,6-dicarboxylate N-succinyltransferase	1	0	1	1	0	0	11	10	30	10	0	0					0.46	0.00765695			3.25391e-07	0.0100306	0
YPK_TSS_223	NC_010465	-	1203791		91	mTSS	GAT	YPK_1065	ampM	methionine aminopeptidase, type I	1	0	0	0	0	0	15	3	3	0	1	1									1.54697e-11
YPK_TSS_224	NC_010465	+	1203901		234	mTSS	CGG	YPK_1066	rpsB	ribosomal protein S2	1	0	1	0	0	0	282	3	28	0	0	1	0.03	0			0.05	2.07698e-11			0		0
YPK_TSS_225	NC_010465	+	1207634		52	mTSS	GCA	YPK_1070	dxr	1-deoxy-D-xylulose 5-phosphate reductoisomerase	1	1	1	1	0	0	25	111	25	66	1	1	0.08	6.63735e-18	0	6.3292e-130	0.1	1.27863e-16			5.27821e-13	0	0	0.000895987
YPK_TSS_226	NC_010465	+	1208942	1208941	164	mTSS	ATC	YPK_1071	uppS	undecaprenyl diphosphate synthase	0	1	0	1	1	1	5	15	1	11	65	11							0	1.40728e-06		0.0127478		0.0286839
YPK_TSS_227	NC_010465	+	1209068		38	mTSS	GAC	YPK_1071	uppS	undecaprenyl diphosphate synthase	0	0	1	1	0	0	5	9	46	15	0	0					0.2	1.02645e-32	0	1.18535e-10			0	0.026241
YPK_TSS_228	NC_010465	+	1210548		203	mTSS	GGT	YPK_1073	rscP	membrane-associated zinc metalloprotease	1	1	1	1	0	1	32	25	42	25	24	33	0	7.56448e-26	0.25	2.1992e-10	0.09	3.79536e-29			0	2.34092e-05	0	0.0134205
YPK_TSS_229	NC_010465	+	1211798		345	mTSS	ATT	YPK_1074	yaeT	outer membrane protein assembly complex, YaeT protein	1	0	0	0	0	0	13	2	4	6	1	3	0.33	0.000176174							8.62677e-05		1.47274e-05
YPK_TSS_230	NC_010465	+	1211958		185	mTSS	ATG	YPK_1074	yaeT	outer membrane protein assembly complex, YaeT protein	1	1	0	0	0	0	22	15	8	3	4	1									1.89553e-13	0.0133205	0.000129998
YPK_TSS_231	NC_010465	+	1222785		345	mTSS	ACC	YPK_1082	accA	acetyl-CoA carboxylase, carboxyl transferase, alpha subunit	1	0	0	0	0	0	21	8	4	0	3	2	0	9.51488e-16							7.94996e-10		3.75334e-07
YPK_TSS_232	NC_010465	-	1227365		25	mTSS	TTA	YPK_1087		protein of unknown function UPF0253	1	1	1	1	1	1	39	353	22	38	90	10									0	0	0	0.000465183
YPK_TSS_233	NC_010465	-	1227424		84	mTSS	AGT	YPK_1087		protein of unknown function UPF0253	1	1	1	1	1	0	28	16	27	27	18	3	0.45	4.44093e-10	0	1.74166e-18	0.15	5.99929e-11	0.38	1.37899e-10	0	0.00138827	0
YPK_TSS_234	NC_010465	-	1231222		53	mTSS	CTT	YPK_1091	proS	prolyl-tRNA synthetase	1	0	1	0	0	0	37	4	24	0	0	0	0.34	2.60873e-20			0.33	2.89423e-09			0		0
YPK_TSS_235	NC_010465	-	1232413		29	mTSS	CTT	YPK_1093	rcsF	putative lipoprotein	0	0	1	0	0	0	9	6	15	0	4	0					0.18	1.35014e-09			9.79214e-06		0
YPK_TSS_236	NC_010465	-	1235124		66	mTSS	CAC	YPK_1096	metN-1	D-methionine ABC transporter, ATPase subunit	1	0	1	0	0	0	9	0	3	0	0	0	0.11	6.13881e-06			0	0.00998663			5.54881e-10		3.37804e-06
YPK_TSS_237	NC_010465	+	1235220		25	mTSS	GTT	YPK_1097	gmhB	D,D-heptose 1,7-bisphosphate phosphatase	1	1	1	0	0	0	53	21	69	6	5	1	0.18	3.28757e-38							0	0.000100288	0
YPK_TSS_238	NC_010465	-	1235231		173	mTSS	GGG	YPK_1096	metN-1	D-methionine ABC transporter, ATPase subunit	1	0	1	0	0	0	4	1	6	0	2	0	0	0.00389182			0	0.00277384
YPK_TSS_239	NC_010465	+	1243560		82	mTSS	AAT	YPK_1104		endonuclease/exonuclease/phosphatase	1	1	1	1	1	1	14	28	24	44	15	13	0.22	3.32056e-08	0	7.66771e-30	0.39	2.4098e-09	0	1.2919e-48	2.48103e-07	0.000248799	0	6.45052e-07
YPK_TSS_240	NC_010465	-	1245854		-10	rmTSS	TCT	YPK_1105	mltD	lytic transglycosylase catalytic	1	1	1	0	1	0	27	56	32	9	22	2			0	8.76377e-55	0.31	5.5842e-10			0	6.98575e-05	0
YPK_TSS_241	NC_010465	+	1247954	1247953	51	mTSS	ATC	YPK_1109	dnaQ	DNA polymerase III, epsilon subunit	1	1	1	1	1	1	21	13	25	11	26	11	0.34	2.78585e-13	0	2.75542e-11	0.24	2.27012e-17	0	1.59521e-11	0	0.001633	0
YPK_TSS_242	NC_010465	+	1250719		101	mTSS	AGG	YPK_1111	hpxB	urate catabolism protein	0	1	1	1	1	0	3	48	12	42	14	4			0.13	3.57158e-38			0.19	9.59781e-28	2.34347e-05	5.39483e-08	2.01147e-05	0.000149517
YPK_TSS_243	NC_010465	+	1263048		178	mTSS	ATC	YPK_1124	cspB-1	cold-shock DNA-binding domain protein	1	1	0	1	1	0	29	83	1	22	21	3	0.07	6.64351e-30	0.09	2.47353e-89			0.25	1.32316e-12	0	8.74867e-12		0.0026342
YPK_TSS_244	NC_010465	+	1269604		627	mTSS	GAT	YPK_1131	ureA	urease, gamma subunit	0	1	0	0	0	0	0	3	0	0	0	0			0	0.0234619
YPK_TSS_245	NC_010465	+	1269840		391	mTSS	GCG	YPK_1131	ureA	urease, gamma subunit	0	0	1	0	0	0	5	3	26	0	1	0					0.11	2.95094e-17					0
YPK_TSS_246	NC_010465	-	1279446		283	mTSS	ATC	YPK_1140	hdeB	acid-resistance protein	1	1	1	1	1	0	21	94	93	15	18	5	0.21	7.79339e-21	0.21	9.87395e-57	0.22	3.69754e-58			9.63454e-05	0	0	0.00053695
YPK_TSS_247	NC_010465	+	1287829	1287827;1287828	117	mTSS	AAA	YPK_1151	seqA	SeqA family protein	1	1	1	1	1	0	13	19	15	13	11	6	0.35	0.0363223	0.23	4.5766e-08			0	2.38875e-08	0	5.6238e-05	0	0.00830682
YPK_TSS_248	NC_010465	+	1309872		126	mTSS	CCG	YPK_1172	pcp-2	pyrrolidone-carboxylate peptidase	0	0	1	0	0	0	2	2	10	2	1	1					0.18	2.67042e-05					9.31596e-08
YPK_TSS_249	NC_010465	-	1311455		33	mTSS	TCA	YPK_1173	ung	uracil-DNA glycosylase	1	0	1	0	0	0	12	5	10	0	1	1	0	4.47014e-13			0.27	2.13392e-06			2.40103e-05		2.89702e-15
YPK_TSS_250	NC_010465	+	1311555		219	mTSS	AGT	YPK_1174	grcA	formate C-acetyltransferase glycine radical	0	0	0	1	0	0	1	3	2	11	1	1
YPK_TSS_251	NC_010465	+	1311696		78	mTSS	AAG	YPK_1174	grcA	formate C-acetyltransferase glycine radical	1	1	1	0	1	1	37	42	32	8	42	16					0.34	7.76421e-11			0	2.51283e-06	0	0.0152272
YPK_TSS_252	NC_010465	-	1315506	1315507	18	mTSS	CCA	YPK_1179	srmB	DEAD/DEAH box helicase domain protein	1	1	1	0	0	0	19	15	40	3	5	1					0.32	7.77196e-13			0		0
YPK_TSS_253	NC_010465	-	1315574		86	mTSS	AAA	YPK_1179	srmB	DEAD/DEAH box helicase domain protein	0	0	0	1	0	0	0	0	0	19	1	1							0	1.62024e-17				0.00416461
YPK_TSS_254	NC_010465	-	1318398		-8	rmTSS	ACT	YPK_1181	nadB	L-aspartate oxidase	1	1	1	0	1	1	38	12	35	8	259	46					0.35	2.39838e-18			0	0.00869609	0	0.0135232
YPK_TSS_255	NC_010465	+	1318517		77	mTSS	GCT	YPK_1182	rpoE	RNA polymerase, sigma-24 subunit, ECF subfamily	1	1	1	1	0	1	18	135	278	128	4	11	0.14	2.03888e-12	0.4	1.00688e-45	0.03	0	0.04	7.00685e-116	2.62249e-14	0	0	0
YPK_TSS_256	NC_010465	+	1318974	1318973	221	mTSS	AAG	YPK_1183	rseA	anti sigma-E protein, RseA	0	1	1	1	1	1	8	179	58	382	173	75					0.32	3.19027e-16			0.000153913	0	0	0
YPK_TSS_257	NC_010465	+	1322545		89	mTSS	ATA	YPK_1187	lepA	GTP-binding protein LepA	1	0	0	0	0	0	13	6	5	1	1	1									0		9.40763e-07
YPK_TSS_258	NC_010465	+	1325751		42	mTSS	TAT	YPK_1189	rnc	ribonuclease III	0	1	1	0	1	0	19	15	11	6	28	4			0	4.67323e-14	0.29	0.00140928			2.23815e-15	0.00801529	1.69588e-14
YPK_TSS_259	NC_010465	+	1328197		78	mTSS	CAC	YPK_1192	pdxJ	pyridoxal phosphate biosynthetic protein PdxJ	1	0	1	0	1	0	11	7	11	5	13	2									1.48063e-11	0.0123642	3.8235e-14
YPK_TSS_260	NC_010465	+	1334099		25	mTSS	ACG	YPK_1200		Arc domain protein DNA binding domain protein	1	0	1	0	0	0	12	1	10	2	0	0	0	4.53262e-15			0.24	6.61775e-07			1.11657e-12		0
YPK_TSS_261	NC_010465	-	1347217	1347216	30	mTSS	AAC	YPK_1216		hypothetical protein YPK_1216	1	1	1	1	1	1	49	15	22	23	11	12	0.22	4.57466e-35								0.0100117
YPK_TSS_262	NC_010465	-	1349984		350	mTSS	TCC	YPK_1221		transcriptional regulator, XRE family	1	1	1	1	1	1	43	109	47	74	50	12	0.39	1.38724e-31	0.35	6.5276e-56			0.32	3.65899e-42	0	0	0	6.19726e-10
YPK_TSS_263	NC_010465	+	1375399		24	mTSS	CGC	YPK_1251	tadA	tRNA-specific adenosine deaminase	1	0	0	0	0	0	12	0	6	0	0	0	0	2.43754e-11							3.73364e-07
YPK_TSS_264	NC_010465	-	1377646		-8	rmTSS	CAC	YPK_1252		lytic transglycosylase catalytic	0	1	0	0	0	0	9	12	8	2	2	0			0	2.43248e-12					7.1773e-05	0.00429034	2.90985e-05
YPK_TSS_265	NC_010465	+	1377803		86	mTSS	GCG	YPK_1253	purL	phosphoribosylformylglycinamidine synthase	1	0	1	0	0	0	14	0	26	0	0	0	0	3.48268e-17			0.21	3.51109e-18					0
YPK_TSS_266	NC_010465	+	1386026		266	mTSS	GTA	YPK_1258		hypothetical protein YPK_1258	0	0	1	0	0	0	7	3	15	1	0	1					0	1.20541e-13			0.000143995		7.38672e-12
YPK_TSS_267	NC_010465	+	1393865		251	mTSS	AGA	YPK_1265	glyA	glycine hydroxymethyltransferase	1	1	1	1	1	1	50	49	48	43	56	20	0.36	5.76428e-24	0.23	7.64362e-45					0	2.433e-05	0	0.00109461
YPK_TSS_268	NC_010465	+	1395762		59	mTSS	GGC	YPK_1268	ailA	virulence-related outer membrane protein	1	1	1	1	1	0	137	64	1883	31	25	6	0.02	2.06637e-104	0	3.47825e-52	0.04	0			0	2.98329e-12	0	0.0175781
YPK_TSS_269	NC_010465	+	1396857		17	mTSS	CTG	YPK_1269	hcaT	chloramphenicol O-acetyltransferase	1	0	0	0	0	0	16	1	8	0	0	0	0	8.55026e-19							0
YPK_TSS_270	NC_010465	-	1399423	1399422	34	mTSS	GAT	YPK_1270	csiE	stationary phase inducible protein CsiE	0	1	0	1	0	0	1	16	7	27	1	1										0.0162423
YPK_TSS_271	NC_010465	-	1402157		37	mTSS	GTT	YPK_1273	suhB	inositol-phosphate phosphatase	1	1	1	0	0	0	112	15	22	1	4	4			0	2.18931e-10	0.33	3.54587e-11			0	0.0495789	8.52417e-12
YPK_TSS_272	NC_010465	+	1402213		26	mTSS	GAT	YPK_1274	trmJ	RNA methyltransferase, TrmH family, group 1	1	0	1	0	0	0	14	6	15	3	1	0									1.04984e-09		9.82208e-11
YPK_TSS_273	NC_010465	+	1403139	1403140	-34	rmTSS	TTC	YPK_1275	iscR	transcriptional regulator, BadM/Rrf2 family	1	1	1	1	0	0	81	15	33	28	7	4	0.08	1.1051e-77			0.32	1.31895e-17						0.00287204
YPK_TSS_274	NC_010465	+	1418441		140	mTSS	ATA	YPK_1289	ndk	nucleoside-diphosphate kinase	1	0	1	1	0	0	26	10	17	22	0	0									0		1.47606e-08	0.00226066
YPK_TSS_275	NC_010465	+	1418451		130	mTSS	GCC	YPK_1289	ndk	nucleoside-diphosphate kinase	1	0	0	0	0	0	61	2	14	0	0	0	0.07	3.59406e-23							0		2.50871e-09
YPK_TSS_276	NC_010465	+	1420978		382	mTSS	GCG	YPK_1292	yfgA	transcriptional regulator, XRE family	0	1	0	0	0	0	7	14	3	1	1	1			0	4.98299e-11					3.02988e-07	0.00875779	3.53634e-06
YPK_TSS_277	NC_010465	-	1431753		35	mTSS	TTA	YPK_1301	xseA	exodeoxyribonuclease VII, large subunit	1	1	0	0	0	0	3	3	2	0	1	0			0	0.00564244
YPK_TSS_278	NC_010465	+	1431855		33	mTSS	CTT	YPK_1302	guaB	inosine-5'-monophosphate dehydrogenase	0	0	1	0	0	0	8	4	12	0	9	3											0.000659135
YPK_TSS_279	NC_010465	+	1450270		136	mTSS	TCT	YPK_1320		hypothetical protein YPK_1320	1	1	0	1	1	0	10	26	8	19	10	8	0	8.00377e-14	0	6.9796e-31			0	0	0.000136012	0.00782665	0
YPK_TSS_280	NC_010465	-	1452267		24	mTSS	GAT	YPK_1322		conserved hypothetical protein	1	1	1	1	0	0	12	12	21	28	0	0									4.05568e-09	0.00759719	0	0.0191158
YPK_TSS_281	NC_010465	+	1452377		97	mTSS	GAC	YPK_1323		inhibitor of vertebrate lysozyme	0	0	1	0	0	1	3	1	22	5	0	16					0	6.8028e-26					0
YPK_TSS_282	NC_010465	-	1456855		28	mTSS	GGT	YPK_1326	yegP	protein of unknown function DUF1508	0	1	1	0	1	1	1	250	13	8	25	12					0.07	6.84608e-09				0	0
YPK_TSS_283	NC_010465	-	1456928		101	mTSS	TTA	YPK_1326	yegP	protein of unknown function DUF1508	1	1	1	0	0	0	17	10	19	2	4	1	0	4.70531e-20	0	6.59697e-13	0.07	3.43107e-17					1.58371e-11
YPK_TSS_284	NC_010465	-	1483578		40	mTSS	GAC	YPK_1344	ppk	polyphosphate kinase	1	1	1	1	1	1	58	35	37	87	25	22	0.2	2.03383e-57	0.25	8.88506e-15	0.25	3.96457e-27			0	4.75714e-10	0	1.94795e-09
YPK_TSS_285	NC_010465	-	1490671		33	mTSS	ACA	YPK_1349	speG	GCN5-related N-acetyltransferase	1	0	1	0	0	0	21	9	59	3	5	1	0	1.19834e-22			0.15	1.72474e-45			0		0
YPK_TSS_286	NC_010465	+	1493057		40	mTSS	GAT	YPK_1352	upp	uracil phosphoribosyltransferase	1	0	1	0	0	0	371	0	162	0	0	0									0		0
YPK_TSS_287	NC_010465	+	1495368		27	mTSS	GTT	YPK_1354	hda	DnaA regulatory inactivator Hda	1	1	1	0	0	0	47	40	22	3	8	6	0.3	3.20964e-36	0.31	1.62505e-36	0.4	2.46087e-16			0	0.000331475	0
YPK_TSS_288	NC_010465	-	1498427		75	mTSS	AGT	YPK_1356		peptidase M48 Ste24p	1	1	1	1	1	0	28	34	46	42	11	8	0	3.97725e-33	0	4.67517e-37	0.11	1.6294e-44	0	2.87192e-49	9.75214e-13	0.000681249	0	3.84518e-05
YPK_TSS_289	NC_010465	-	1502696	1502695	-16	rmTSS	CCC	YPK_1361	gcvR	glycine cleavage system regulatory protein	1	1	1	1	0	0	23	10	21	13	5	4	0.19	1.17169e-17	0	1.73091e-08	0	2.08354e-15	0	0	0.000441655	0.0223894	1.30476e-09
YPK_TSS_290	NC_010465	+	1502790		24	mTSS	ACT	YPK_1362	dapA	dihydrodipicolinate synthase	1	0	1	0	0	0	12	4	17	1	4	1											7.86987e-05
YPK_TSS_291	NC_010465	+	1505767		25	mTSS	AGA	YPK_1366		protein of unknown function zinc metallopeptidase putative	1	0	1	0	0	0	48	7	55	0	1	0									0	0.00878296	0
YPK_TSS_292	NC_010465	-	1512087		74	mTSS	TTG	YPK_1373		arsenate reductase and related	1	0	1	0	0	0	12	5	10	2	1	1	0.43	0.00257929			0.4	2.72806e-05			2.72862e-12		2.14405e-08
YPK_TSS_293	NC_010465	+	1512924	1512925	33	mTSS	TTC	YPK_1375	afuA, fbpA	extracellular solute-binding protein family 1	0	1	1	0	0	0	1	37	155	2	0	0					0.04	1.11355e-152				5.83146e-05
YPK_TSS_294	NC_010465	+	1517424		26	mTSS	GGA	YPK_1378	ydeN	sulfatase	0	0	1	0	0	0	1	2	16	3	0	0					0.22	2.88077e-06					0
YPK_TSS_295	NC_010465	+	1527922		131	mTSS	GAA	YPK_1385	napF	ferredoxin-type protein NapF	0	1	0	0	0	0	7	70	5	2	0	0			0.16	4.83922e-43					8.89041e-11	0
YPK_TSS_296	NC_010465	-	1542213		63	mTSS	AAA	YPK_1397	ygiW	conserved hypothetical protein	0	1	0	0	0	0	3	53	8	9	7	1			0.27	1.83957e-30						2.80224e-07	1.02255e-09
YPK_TSS_297	NC_010465	-	1545996		40	mTSS	TTA	YPK_1401	nanE	N-acylglucosamine-6-phosphate 2-epimerase	1	0	1	0	0	0	23	0	10	0	0	0					0.07	6.68073e-08			5.01682e-16		6.95438e-11
YPK_TSS_298	NC_010465	+	1547476		45	mTSS	ATT	YPK_1404	nanK	N-acetylmannosamine kinase	1	0	1	0	0	0	130	1	89	0	0	0									0		0
YPK_TSS_299	NC_010465	+	1550433		184	mTSS	GAG	YPK_1407	nanT	major facilitator superfamily MFS_1	1	0	1	0	0	0	16	1	20	7	0	0	0	6.06795e-19			0.04	9.49416e-21			0		0
YPK_TSS_300	NC_010465	-	1576444	1576443	233	mTSS	ATT	YPK_1426	crr	PTS system, glucose subfamily, IIA subunit	1	1	0	1	0	0	21	13	18	15	5	3	0	6.22869e-11					0	1.26502e-11		0.0196909
YPK_TSS_301	NC_010465	-	1576599		388	mTSS	GAT	YPK_1426	crr	PTS system, glucose subfamily, IIA subunit	1	1	1	1	0	0	34	30	46	10	16	6	0.19	2.13724e-21	0	3.93276e-17	0.24	2.18418e-20			1.7811e-09	0.00117784	0
YPK_TSS_302	NC_010465	-	1578327		34	mTSS	CAC	YPK_1428	ptsH	phosphotransferase system, phosphocarrier protein HPr	0	1	0	0	0	0	10	35	13	0	13	2									4.34315e-07	0.000777433	8.69482e-08
YPK_TSS_303	NC_010465	-	1578366		73	mTSS	TAC	YPK_1428	ptsH	phosphotransferase system, phosphocarrier protein HPr	1	0	1	0	0	0	14	0	25	3	2	2	0.38	0.04844			0.4	0.00109392			0		0
YPK_TSS_304	NC_010465	-	1579795		35	mTSS	TTC	YPK_1429	cysK-2	cysteine synthase A	1	1	1	0	1	1	60	25	430	9	157	14	0.44	1.16053e-31	0.31	1.12307e-13	0.29	0			0	0.000389184	0
YPK_TSS_305	NC_010465	-	1580709		58	mTSS	TCA	YPK_1430	cysZ	putative sulfate transport protein CysZ	1	1	1	0	0	0	21	27	21	6	7	1	0	6.66464e-24	0	1.541e-30	0.18	5.04331e-16			0	2.55124e-05	0
YPK_TSS_306	NC_010465	+	1580853		47	mTSS	GTG	YPK_1431	zipA	cell division protein ZipA	1	1	1	1	1	1	63	82	37	40	45	18	0.08	5.03795e-54	0	9.24452e-78	0.08	1.9645e-27	0	8.85345e-28	0	6.81472e-13	0	0.000282058
YPK_TSS_307	NC_010465	-	1587536		58	mTSS	TTT	YPK_1437	gltX	glutamyl-tRNA synthetase	0	1	1	0	0	0	25	12	42	4	6	2			0	2.19826e-12					1.28387e-13		0
YPK_TSS_308	NC_010465	-	1587547		69	mTSS	ACT	YPK_1437	gltX	glutamyl-tRNA synthetase	1	0	0	0	0	0	12	1	3	0	1	0									7.6867e-05
YPK_TSS_309	NC_010465	-	1590354		33	mTSS	AAA	YPK_1438	nupC-1	nucleoside transporter	0	0	1	0	0	0	58	0	30	0	0	0					0.38	2.50388e-06			0		0
YPK_TSS_310	NC_010465	-	1590396		75	mTSS	CAC	YPK_1438	nupC-1	nucleoside transporter	1	0	0	0	0	0	41	0	3	0	8	1	0.14	1.04608e-23							0
YPK_TSS_311	NC_010465	+	1590731		41	mTSS	GTA	YPK_1439	mntH	Mn2+/Fe2+ transporter, NRAMP family	0	0	0	1	0	0	0	0	0	11	0	0							0	5.68041e-05
YPK_TSS_312	NC_010465	-	1594708		27	mTSS	GAA	YPK_1442		transcriptional regulator, LysR family	0	0	0	1	0	0	6	6	9	13	1	5											3.90181e-06	0.00836068
YPK_TSS_313	NC_010465	+	1595405		36	mTSS	AAT	YPK_1444	glk	glucokinase	1	0	0	0	0	0	11	8	6	5	0	0									8.67758e-07		2.67935e-05
YPK_TSS_314	NC_010465	+	1597941		62	mTSS	AGA	YPK_1446	alaC	aminotransferase class I and II	1	1	1	1	0	1	19	15	68	14	6	10	0	1.11007e-22	0	1.28128e-18	0.09	3.56862e-74	0	1.19587e-15			0	0.0217531
YPK_TSS_315	NC_010465	-	1615783		53	mTSS	CAC	YPK_1463	sfuA	extracellular solute-binding protein family 1	1	1	0	0	0	0	78	35	9	3	2	0	0.07	2.7849e-84	0	9.78055e-42					0	1.50842e-07	9.09434e-11
YPK_TSS_316	NC_010465	+	1616031		28	mTSS	ACT	YPK_1464	mltB-1	lytic murein transglycosylase B	1	0	0	0	0	0	13	3	9	2	7	1	0.21	1.30049e-13							4.38229e-05		2.22801e-06
YPK_TSS_317	NC_010465	+	1658611		39	mTSS	TCC	YPK_1496	ccmA	heme exporter protein CcmA	0	0	1	0	0	0	7	24	10	1	6	0					0.18	4.06752e-08				0.0027842	1.64087e-06
YPK_TSS_318	NC_010465	-	1668015		53	mTSS	TTT	YPK_1506	fadL	membrane protein involved in aromatic hydrocarbon degradation	1	0	0	0	0	0	236	3	10	0	0	0	0.24	1.72123e-127							0		3.01716e-08
YPK_TSS_319	NC_010465	-	1668060		98	mTSS	CTG	YPK_1506	fadL	membrane protein involved in aromatic hydrocarbon degradation	1	1	1	1	0	0	20	73	158	103	2	1	0.14	1.45954e-05	0	3.97135e-68	0.08	4.21911e-129	0.25	6.74689e-69	4.49865e-10	3.76849e-11	0	6.66662e-12
YPK_TSS_320	NC_010465	+	1668893		66	mTSS	ATC	YPK_1508	fadI	acetyl-CoA C-acyltransferase FadI	0	1	1	1	0	0	5	14	45	26	0	1			0.49	6.28437e-05	0.3	1.18749e-24	0	6.26878e-27		0.00699382	0	0.0175622
YPK_TSS_321	NC_010465	+	1672877		172	mTSS	AAT	YPK_1510		conserved hypothetical protein	0	0	0	1	0	0	4	9	8	13	2	0							0	5.29e-07		0.000876189	1.32687e-08	0.0241333
YPK_TSS_322	NC_010465	+	1674736		86	mTSS	GAT	YPK_1513	prmB	protein-(glutamine-N5) methyltransferase, ribosomal protein L3-specific	1	0	1	1	0	0	10	9	14	16	2	1	0	1.96154e-08			0.11	1.34832e-11	0	1.69495e-08	0.000236232	0.0176957	3.23094e-12	0.0478329
YPK_TSS_323	NC_010465	+	1674783	1674781	39	mTSS	ATA	YPK_1513	prmB	protein-(glutamine-N5) methyltransferase, ribosomal protein L3-specific	1	0	0	1	1	0	10	5	5	13	17	8	0.2	3.10447e-05							6.68218e-10		0.000129256
YPK_TSS_324	NC_010465	+	1679156		103	mTSS	GCC	YPK_1518		YfcL protein	1	0	1	0	0	0	15	0	10	0	0	0	0	3.49539e-14			0	1.61809e-07			0		0
YPK_TSS_325	NC_010465	-	1681810		26	mTSS	CCC	YPK_1519	mnmC	tRNA U-34 5-methylaminomethyl-2-thiouridine biosynthesis protein MnmC	1	0	1	0	0	0	15	7	11	1	1	0	0.25	7.43505e-15			0.23	9.28465e-12			4.61886e-09		0
YPK_TSS_326	NC_010465	+	1681917	1681918	39	mTSS	GCA	YPK_1520	fabB	beta-ketoacyl synthase	1	1	1	0	1	0	60	12	16	5	19	2	0.08	6.2488e-37	0	2.5514e-06	0.3	0.00116612			0	0.0160073	0
YPK_TSS_327	NC_010465	+	1689381		43	mTSS	CCC	YPK_1527	pdxB	D-isomer specific 2-hydroxyacid dehydrogenase NAD-binding	1	0	1	0	0	0	17	6	26	2	4	1	0.1	1.47477e-14			0.05	8.03887e-21			2.19845e-10	0.0113451	0
YPK_TSS_328	NC_010465	+	1693502		160	mTSS	ACA	YPK_1531	accD	acetyl-CoA carboxylase, carboxyl transferase, beta subunit	1	1	1	0	0	0	27	14	25	4	6	0	0.19	2.40267e-09	0.46	0.00023501	0.2	1.96723e-08			0	0.0137061	0
YPK_TSS_329	NC_010465	+	1700376		357	mTSS	GCA	YPK_1538	hisJ	cationic amino acid ABC transporter, periplasmic binding protein	0	1	1	1	0	0	4	18	22	14	0	0			0	7.92364e-19	0.03	5.63031e-19	0.44	0.0019485		0.00772836	0	0.0210874
YPK_TSS_330	NC_010465	-	1704858		5	lmTSS	GGC	YPK_1542	yfcH	cell division inhibitor	0	1	0	1	0	0	1	11	1	13	5	2			0	0.000155553			0	4.04623e-06		0.0181615		0.0389609
YPK_TSS_331	NC_010465	-	1704912	1704914	59	mTSS	AAA	YPK_1542	yfcH	cell division inhibitor	0	1	1	1	1	0	5	28	13	40	13	4			0.39	0.000199711	0.2	2.56783e-07				0	0	0.00556863
YPK_TSS_332	NC_010465	-	1709719		26	mTSS	ACA	YPK_1548	ulaC	putative PTS IIA-like nitrogen-regulatory protein PtsN	1	0	1	0	0	0	20	2	54	0	0	0	0.43	1.9886e-16							0		0
YPK_TSS_333	NC_010465	-	1715078		194	mTSS	TTC	YPK_1551	ackA	acetate kinase	1	0	0	0	0	0	13	1	2	0	0	0									7.60565e-10
YPK_TSS_334	NC_010465	+	1716588		141	mTSS	GTT	YPK_1554		HAD-superfamily hydrolase, subfamily IA, variant 3	1	0	1	0	0	0	12	7	19	1	1	0	0	6.05953e-13			0.2	2.25615e-15			1.24922e-09		5.07906e-14
YPK_TSS_335	NC_010465	+	1722957		78	mTSS	GTC	YPK_1559	rovM	transcriptional regulator, LysR family	0	0	0	0	1	0	0	4	0	0	61	0
YPK_TSS_336	NC_010465	+	1724341		304	mTSS	GAT	YPK_1560	nuoA	NADH-ubiquinone/plastoquinone oxidoreductase chain 3	1	1	1	1	0	0	32	74	31	19	9	2	0	1.29797e-22	0	3.9126e-71	0.08	1.88214e-23	0.34	4.88514e-07	0	1.3791e-12	0	0.00325004
YPK_TSS_337	NC_010465	+	1724462		183	mTSS	ACT	YPK_1560	nuoA	NADH-ubiquinone/plastoquinone oxidoreductase chain 3	0	1	0	0	0	0	5	12	9	7	0	1			0	0.000139899						0.0136353	0
YPK_TSS_338	NC_010465	+	1724511		134	mTSS	AGT	YPK_1560	nuoA	NADH-ubiquinone/plastoquinone oxidoreductase chain 3	1	1	1	0	1	0	73	22	54	4	18	6	0.4	3.26651e-32	0	1.39562e-11	0.28	1.52161e-24			0	0.01182	0
YPK_TSS_339	NC_010465	+	1746072		33	mTSS	ACT	YPK_1578		transcriptional regulator, LacI family	1	0	1	0	0	0	17	8	13	0	1	0	0.13	1.03555e-19			0.09	1.12996e-14			1.26155e-08		2.16372e-10
YPK_TSS_340	NC_010465	+	1753376		155	mTSS	ACC	YPK_1585	elaB	protein of unknown function DUF883 ElaB	0	1	0	0	0	0	0	29	0	2	1	0			0	1.23442e-21						3.67291e-05
YPK_TSS_341	NC_010465	+	1753507		24	mTSS	CTT	YPK_1585	elaB	protein of unknown function DUF883 ElaB	0	0	0	0	1	0	0	2	1	4	75	0
YPK_TSS_342	NC_010465	+	1757051		155	mTSS	AGG	YPK_1589	menD	2-succinyl-6-hydroxy-2,4-cyclohexadiene-1-carboxylic acid synthase/2-oxoglutarate decarboxylase	1	1	1	1	0	0	25	12	48	21	2	0	0.47	1.26922e-15							7.03537e-15	0.00878303	0
YPK_TSS_343	NC_010465	-	1770719		334	mTSS	GTT	YPK_1600	glnH	cationic amino acid ABC transporter, periplasmic binding protein	0	0	0	0	1	1	1	45	7	76	42	28										7.06505e-08		1.18038e-06
YPK_TSS_344	NC_010465	-	1772945		41	mTSS	GTG	YPK_1602	dps	ferritin Dps family protein	0	1	0	1	1	0	6	71	5	34	20	5			0.15	6.7239e-22					0.000583147	5.05988e-12	0.00210877	0.00542854
YPK_TSS_345	NC_010465	+	1775722		43	mTSS	GTG	YPK_1606	ompX/ailD	virulence-related outer membrane protein	1	1	1	0	1	0	470	11	162	5	152	3	0.36	0	0	2.52095e-12	0.47	1.59609e-80			0		0
YPK_TSS_346	NC_010465	-	1787208		38	mTSS	TAC	YPK_1615	dmlR	transcriptional regulator, LysR family	0	0	0	1	0	0	0	9	3	17	1	1							0	4.49249e-21				0.00614084
YPK_TSS_347	NC_010465	+	1803647		18	mTSS	GTT	YPK_1624	trp14A-1	transposase IS3/IS911 family protein	1	1	0	1	1	0	11	25	9	13	24	2	0	1.1007e-13	0	7.81506e-29					8.86323e-06	0.0172185	0.000103998	0.0286343
YPK_TSS_348	NC_010465	+	1824266		232	mTSS	AGG	YPK_1644	cas-1	CRISPR-associated protein Cas1	0	1	0	1	0	0	3	52	1	33	3	0			0.46	1.35413e-44						0.0191602		0.000259721
YPK_TSS_349	NC_010465	+	1837651	1837649	25	mTSS	AGG	YPK_1655	ypsR	transcriptional regulator, LuxR family	0	1	0	1	0	0	8	12	5	12	2	1			0	4.05476e-12					3.22634e-12	0.0104912	9.19883e-09
YPK_TSS_350	NC_010465	-	1839078		28	mTSS	TTT	YPK_1656	ypsI	autoinducer synthesis protein	1	0	0	0	0	0	37	2	4	1	0	0	0.08	3.24044e-21							0
YPK_TSS_351	NC_010465	-	1842317		51	mTSS	ATT	YPK_1658	cvrA, nhaP2	sodium/hydrogen exchanger	1	0	0	1	0	0	10	9	3	19	1	1	0.18	2.44349e-08					0	2.8106e-22	1.19852e-05		0.000119107
YPK_TSS_352	NC_010465	-	1842975		120	mTSS	CCA	YPK_1659		conserved hypothetical protein	0	1	0	0	0	0	5	13	3	0	6	0			0	8.48467e-07						0.00144192
YPK_TSS_353	NC_010465	-	1850728		174	mTSS	GGC	YPK_1664	yceE	amino acid/peptide transporter	1	0	0	0	0	0	10	6	4	3	0	0	0	3.60474e-12							4.46976e-08		5.33549e-10
YPK_TSS_354	NC_010465	-	1852323		145	mTSS	CCG	YPK_1665	htrB	lipid A biosynthesis lauroyl (or palmitoleoyl) acyltransferase	0	1	0	0	0	0	3	11	1	6	1	0										0.0124627
YPK_TSS_355	NC_010465	-	1859025		72	mTSS	CTC	YPK_1673	bssS	conserved hypothetical protein	1	1	1	1	1	1	79	430	91	126	34	11	0.06	1.5925e-90	0.01	0	0.05	8.56634e-99	0	1.84316e-142	0	0	0	1.34989e-09
YPK_TSS_356	NC_010465	-	1861127		64	mTSS	CCG	YPK_1675	pyrC	dihydroorotase, homodimeric type	1	0	1	0	0	0	20	1	22	0	0	0	0	5.06151e-23			0.11	5.6767e-21			1.32459e-12		0
YPK_TSS_357	NC_010465	-	1865808		315	mTSS	TTT	YPK_1677	rne	ribonuclease, Rne/Rng family	0	1	0	1	0	0	3	19	3	11	7	11							0	1.39279e-06		0.0158602
YPK_TSS_358	NC_010465	-	1865858		365	mTSS	AAA	YPK_1677	rne	ribonuclease, Rne/Rng family	1	1	1	1	1	0	27	38	28	19	20	8	0	2.06767e-25	0	6.8561e-31	0.06	1.90967e-23	0.34	6.87333e-06	0	5.24546e-05	0	0.00399394
YPK_TSS_359	NC_010465	+	1866068		0	lmTSS	ATG	YPK_1678	rluC	pseudouridine synthase, RluA family	1	0	0	0	0	0	13	0	7	0	0	0									1.65533e-07		1.69499e-05
YPK_TSS_360	NC_010465	+	1868496		88	mTSS	CGC	YPK_1681	yceD	protein of unknown function DUF177	1	1	1	0	1	0	234	18	81	3	14	2	0.14	4.41034e-138	0	4.3863e-15	0.17	1.47472e-36			0	0.00237564	0
YPK_TSS_361	NC_010465	+	1868846		275	mTSS	ATT	YPK_1682	rpmF	ribosomal protein L32	1	1	1	0	1	0	572	17	157	8	95	4	0.5	2.63406e-96	0	7.07135e-09	0.49	8.59352e-15			0	0.0150521	0	0.0217638
YPK_TSS_362	NC_010465	+	1872117		177	mTSS	GTT	YPK_1686	fabG	3-oxoacyl-(acyl-carrier-protein) reductase	1	0	1	0	1	0	19	4	38	0	47	0	0.12	2.25557e-05			0.21	5.41719e-12			3.51159e-06	0.00918493	0
YPK_TSS_363	NC_010465	+	1873143		39	mTSS	ACC	YPK_1687	acpP	acyl carrier protein	1	1	1	1	1	1	1002	495	635	234	231	17	0.27	0	0.33	5.35939e-173	0.48	3.08811e-105	0.16	1.10228e-174	0	0	0	0
YPK_TSS_364	NC_010465	+	1879900	1879899	116	mTSS	AAA	YPK_1694	ptsG-2	PTS system, glucose-specific IIBC subunit	1	0	1	0	0	0	11	2	18	3	0	0					0.4	0.0222381			2.05845e-10		0
YPK_TSS_365	NC_010465	+	1882788		33	mTSS	TCT	YPK_1696	hinT, hit	histidine triad (HIT) protein	1	0	1	0	0	0	17	9	13	1	2	1	0.24	7.91421e-11			0.07	4.99409e-12			0		0
YPK_TSS_366	NC_010465	-	1894917		215	mTSS	CTC	YPK_1706	mfd	transcription-repair coupling factor	0	0	0	1	0	0	14	33	9	19	9	3							0	0	6.88139e-13	0.000693283	2.1867e-13	0.0295384
YPK_TSS_367	NC_010465	+	1894938		34	mTSS	ACT	YPK_1707	lolC	lipoprotein releasing system, transmembrane protein, LolC/E family	1	0	0	0	0	0	10	4	6	0	1	0	0	2.53114e-10							0.000221752		2.74659e-05
YPK_TSS_368	NC_010465	-	1902898		26	mTSS	ATT	YPK_1713		cupin 4 family protein	1	0	0	0	0	0	12	6	6	0	4	1									1.44303e-07		6.91707e-07
YPK_TSS_369	NC_010465	-	1905177		90	mTSS	ACG	YPK_1715	phoP	two component transcriptional regulator, winged helix family	0	1	1	1	0	0	7	33	46	12	0	0			0.21	1.80162e-25	0.1	1.75716e-46				1.0499e-05	0
YPK_TSS_370	NC_010465	+	1910635		91	mTSS	ATC	YPK_1723	icdA	isocitrate dehydrogenase, NADP-dependent	1	1	1	1	0	0	25	44	44	39	6	3	0.3	2.68991e-06	0.13	1.13552e-15	0.25	5.82715e-10	0	1.01069e-19	7.73511e-12	2.11292e-07	0
YPK_TSS_371	NC_010465	+	1910682		44	mTSS	GAA	YPK_1723	icdA	isocitrate dehydrogenase, NADP-dependent	1	1	1	1	1	1	410	327	522	197	214	33	0.44	7.04724e-132	0.26	2.65003e-175	0.44	1.0843e-147	0.11	6.55305e-190	0	0	0	7.89513e-13
YPK_TSS_372	NC_010465	-	1913718		31	mTSS	TGG	YPK_1725		conserved hypothetical protein	1	1	1	0	0	0	30	82	24	6	9	2	0.23	5.6996e-22	0.5	4.11809e-31	0.14	8.52291e-16			0	2.49505e-11	0
YPK_TSS_373	NC_010465	+	1917274		26	mTSS	ACG	YPK_1728		transcriptional regulator, HxlR family	0	0	0	1	0	0	6	2	7	14	4	3									3.41063e-05		1.77649e-12
YPK_TSS_374	NC_010465	-	1917285		121	mTSS	TGT	YPK_1727		NmrA family protein	0	0	1	0	0	0	3	7	14	8	7	7					0.07	5.5105e-13				0.00751918	1.01205e-11
YPK_TSS_375	NC_010465	-	1918050		23	mTSS	AAA	YPK_1729		conserved hypothetical protein	1	1	1	1	0	0	10	35	11	28	2	2	0.18	1.68416e-06	0.27	1.13527e-13					3.65997e-09	1.74237e-07	1.06154e-11	0.00581038
YPK_TSS_376	NC_010465	-	1920103		34	mTSS	TAT	YPK_1731		conserved hypothetical protein	0	0	0	1	0	0	0	7	9	157	1	6							0.49	1.06647e-28			8.32727e-05	5.58179e-06
YPK_TSS_377	NC_010465	-	1920166		97	mTSS	GTA	YPK_1731		conserved hypothetical protein	0	0	0	1	0	0	0	2	4	64	0	3												0.00315523
YPK_TSS_378	NC_010465	-	1920222	1920220	153	mTSS	CAC	YPK_1731		conserved hypothetical protein	1	1	1	1	1	1	74	117	17	34	34	78	0.08	1.25908e-67	0.26	6.24518e-65	0.03	0.00569146	0.28	0.00509933			0	0.019977
YPK_TSS_379	NC_010465	-	1921302		31	mTSS	ATT	YPK_1732		conserved hypothetical protein	0	0	1	1	0	0	4	9	10	16	2	3					0.11	3.07026e-09				0.00804944	7.26564e-07
YPK_TSS_380	NC_010465	-	1924445		49	mTSS	CTC	YPK_1738		hypothetical protein YPK_1738	1	1	1	1	1	1	435	163	386	170	226	82	0	0	0	1.63831e-187	0.01	0	0.25	2.33683e-123	0	0	0	0
YPK_TSS_381	NC_010465	-	1924462		66	mTSS	TTT	YPK_1738		hypothetical protein YPK_1738	0	0	0	0	1	0	2	11	1	0	17	1
YPK_TSS_382	NC_010465	-	1927841		85	mTSS	CCA	YPK_1739	lacZ	glycoside hydrolase family 2 TIM barrel	0	1	1	1	0	0	4	14	12	12	2	1			0	8.57282e-18	0.34	2.97849e-09	0	1.57053e-14		0.0158554	3.70098e-08
YPK_TSS_383	NC_010465	+	1928117		180	mTSS	TCG	YPK_1740	cspC-1	cold-shock DNA-binding domain protein	1	1	1	1	1	0	411	126	28	12	17	5	0.17	1.66499e-135	0.16	1.92067e-106	0.34	1.17547e-14	0	5.94624e-12	0	0	0
YPK_TSS_384	NC_010465	+	1928700		24	mTSS	ATT	YPK_1741		DsrB protein	1	1	1	0	0	0	21	11	34	2	1	0	0.1	2.15103e-13							0	0.00890436	0
YPK_TSS_385	NC_010465	+	1936535	1936534	398	mTSS	CTC	YPK_1745	flhD	flagellar transcriptional activator	1	1	1	1	0	0	28	91	10	28	2	0	0.06	3.31091e-18			0.18	3.66116e-08			0	0	3.55969e-07	0.00142682
YPK_TSS_386	NC_010465	+	1954861		76	mTSS	GGC	YPK_1760	cwlA, xlyA, xlyB	N-acetylmuramyl-L-alanine amidase, negative regulator of AmpC, AmpD	0	0	1	0	0	0	0	2	14	0	0	0					0.04	2.35506e-14					0
YPK_TSS_387	NC_010465	-	1962208		23	mTSS	AAT	YPK_1765		conserved hypothetical protein	0	1	0	1	1	1	2	63	1	50	23	15			0	3.38947e-63			0.15	1.59416e-37		1.49066e-10		1.56629e-05
YPK_TSS_388	NC_010465	+	1962709		25	mTSS	ATG	YPK_1767		conserved hypothetical protein	1	1	1	0	0	0	44	15	62	11	9	2	0.22	1.94208e-33			0.22	1.97522e-57			0	0.000533373	0	0.0450314
YPK_TSS_389	NC_010465	+	1964765		21	mTSS	ACC	YPK_1769		conserved hypothetical protein	1	1	0	1	0	0	28	52	7	18	6	9	0.04	7.448e-23	0.13	2.04591e-35					0	2.88813e-07	1.36845e-09
YPK_TSS_390	NC_010465	+	1978074	1978073	47	mTSS	GTT	YPK_1782	proQ	ProQ activator of osmoprotectant transporter ProP	1	1	1	1	0	0	32	47	217	14	9	4			0.17	3.78693e-36			0	2.0921e-10	0	3.55667e-07	0
YPK_TSS_391	NC_010465	+	1983462		144	mTSS	TAT	YPK_1787	ecpD	pili assembly chaperone	0	1	0	1	0	0	0	49	0	18	6	5			0.22	4.65787e-30						2.98253e-10
YPK_TSS_392	NC_010465	+	1983473		133	mTSS	CTT	YPK_1787	ecpD	pili assembly chaperone	0	0	0	0	1	0	0	13	1	2	62	3
YPK_TSS_393	NC_010465	-	1990628	1990627	168	mTSS	AAC	YPK_1791	yebQ	major facilitator superfamily MFS_1	0	1	0	1	1	0	4	28	2	11	26	8							0	3.8244e-09
YPK_TSS_394	NC_010465	+	1992113		67	mTSS	ATT	YPK_1793	kdgR	transcriptional regulator, IclR family	1	1	1	0	0	0	27	15	10	2	4	0	0.16	9.29324e-16							0	0.0100727	2.52278e-11
YPK_TSS_395	NC_010465	-	1995875		81	mTSS	TAG	YPK_1795	gltP-1	sodium:dicarboxylate symporter	1	0	0	0	0	0	19	1	7	2	2	1	0.16	1.56329e-16							6.76676e-14		3.42541e-07
YPK_TSS_396	NC_010465	-	1995927		133	mTSS	AAT	YPK_1795	gltP-1	sodium:dicarboxylate symporter	0	1	0	0	0	0	0	40	0	3	5	1			0	3.66636e-47						1.28526e-08
YPK_TSS_397	NC_010465	-	2011171		28	mTSS	TGA	YPK_1811	yniA	fructosamine kinase	1	1	1	1	0	0	11	19	15	10	1	1	0.21	3.52354e-12	0	2.30572e-22	0.11	1.29818e-15	0	2.78051e-11	1.51576e-05	0.000178778	0	0.0148608
YPK_TSS_398	NC_010465	-	2011185		42	mTSS	TTA	YPK_1811	yniA	fructosamine kinase	0	0	0	0	1	0	0	1	0	0	75	0
YPK_TSS_399	NC_010465	+	2014966		322	mTSS	ACT	YPK_1816	mltE	lytic transglycosylase catalytic	1	1	0	1	0	0	10	17	7	44	0	0	0	9.69237e-11	0	5.36715e-19			0.24	4.80783e-39	2.27471e-06	0.00840767	4.80955e-13	0.0025116
YPK_TSS_400	NC_010465	+	2017046		28	mTSS	AGC	YPK_1818		conserved hypothetical protein	1	1	1	1	1	0	151	172	162	228	27	2	0.2	8.23581e-124	0.24	8.87537e-142	0.26	1.83586e-113			0	0	0	0
YPK_TSS_401	NC_010465	+	2018521	2018520	166	mTSS	ACT	YPK_1820	thrS	threonyl-tRNA synthetase	1	0	1	0	0	0	18	3	10	0	8	2	0.14	5.26281e-09			0.07	5.82933e-06			2.20306e-08		1.46536e-09
YPK_TSS_402	NC_010465	+	2020438		382	mTSS	ACA	YPK_1821	infC	initiation factor 3	1	1	1	1	1	1	270	182	265	159	92	36	0.29	2.58259e-112	0.32	2.48282e-94			0.46	8.52079e-50	0	0	0	0
YPK_TSS_403	NC_010465	+	2025577	2025578	169	mTSS	GAT	YPK_1826	ihfA	integration host factor, alpha subunit	1	1	1	1	1	0	204	119	262	131	175	8	0.11	5.21339e-137			0.1	9.02579e-151	0.14	9.40958e-102		0	0.00260836
YPK_TSS_404	NC_010465	+	2029729		96	mTSS	AGC	YPK_1831	pmrH	DegT/DnrJ/EryC1/StrS aminotransferase	1	0	0	0	0	0	13	4	5	0	2	0									0		7.76165e-07
YPK_TSS_405	NC_010465	+	2037308		208	mTSS	AAC	YPK_1838	nlpC	NLP/P60 protein	1	1	1	1	1	1	26	92	12	199	35	25	0.23	2.95458e-22	0.32	2.80109e-56	0.45	0.00349779	0.29	4.63037e-147	0	4.02868e-14	0	0
YPK_TSS_406	NC_010465	-	2041902		51	mTSS	TCA	YPK_1841	aroH	phospho-2-dehydro-3-deoxyheptonate aldolase	1	0	0	0	0	0	14	0	5	0	3	1	0.1	4.43529e-13							1.72049e-10
YPK_TSS_407	NC_010465	+	2051995		122	mTSS	AAT	YPK_1847	sufA	FeS assembly scaffold SufA	1	0	0	0	0	0	29	2	5	3	1	1	0.43	0.000180059							0		1.48789e-06
YPK_TSS_408	NC_010465	+	2058168		76	mTSS	GCC	YPK_1853	erfK	ErfK/YbiS/YcfS/YnhG family protein	1	1	1	1	1	0	54	20	38	16	11	4	0	7.07549e-51	0	1.55897e-23	0.06	6.10849e-30	0	3.90854e-18	0	0.000307692	0	0.000535628
YPK_TSS_409	NC_010465	-	2059942		38	mTSS	CTA	YPK_1854	lpp	LPP repeat-containing protein	1	1	1	1	1	1	5094	3494	6831	954	1814	330	0.42	0	0.21	0	0.5	0			0	0	0	0
YPK_TSS_410	NC_010465	-	2061903		266	mTSS	TCG	YPK_1855	pykF	pyruvate kinase	1	0	0	0	0	0	20	4	4	0	2	0	0	5.73239e-18							5.1759e-10		5.22719e-11
YPK_TSS_411	NC_010465	-	2064343		76	mTSS	CTT	YPK_1856	mdtK, dinF	MATE efflux family protein	0	1	0	0	0	0	6	10	1	6	1	0			0	0						0.0100534
YPK_TSS_412	NC_010465	+	2064472		44	mTSS	AGA	YPK_1857	ribE	riboflavin synthase, alpha subunit	0	0	0	0	1	0	6	8	3	2	12	3
YPK_TSS_413	NC_010465	-	2066443		69	mTSS	TTG	YPK_1858	cfa	cyclopropane-fatty-acyl-phospholipid synthase	0	0	1	0	0	0	2	78	38	26	37	7										0	0
YPK_TSS_414	NC_010465	-	2066687		313	mTSS	ACC	YPK_1858	cfa	cyclopropane-fatty-acyl-phospholipid synthase	0	1	0	1	1	1	0	12	3	17	12	15			0.28	0.00806754						0.00257844		0.0212724
YPK_TSS_415	NC_010465	-	2068239		183	mTSS	CAA	YPK_1859		drug resistance transporter, Bcr/CflA subfamily	1	0	0	0	0	0	15	1	3	0	0	0	0.09	4.3993e-17							0		4.14323e-06
YPK_TSS_416	NC_010465	-	2071600		89	mTSS	TTT	YPK_1863	sodB	superoxide dismutase	0	0	1	1	1	1	2	31	20	32	56	25										8.23825e-06	0	0.00126287
YPK_TSS_417	NC_010465	-	2072881		143	mTSS	AAA	YPK_1864		NLP/P60 protein	0	0	0	0	1	0	0	2	1	8	13	5
YPK_TSS_418	NC_010465	+	2072999		179	mTSS	ACA	YPK_1866	grxD	glutaredoxin-like protein	1	1	1	1	1	0	60	55	42	42	64	9	0.25	1.75082e-32	0	1.34307e-54	0.08	3.54841e-26	0	1.31274e-37	0	4.02418e-06	0	0.0490182
YPK_TSS_419	NC_010465	+	2073098		80	mTSS	GAT	YPK_1866	grxD	glutaredoxin-like protein	1	0	1	0	0	0	20	2	24	4	1	1					0.41	0.0228211			0		0
YPK_TSS_420	NC_010465	-	2074508	2074509	-9	rmTSS	AAT	YPK_1868	rnt	ribonuclease T	1	1	1	0	1	0	17	12	10	3	18	1	0.46	0.00550147	0	1.91682e-09	0.18	2.6022e-05			1.32768e-05	0.0133189	1.574e-08
YPK_TSS_421	NC_010465	-	2075057		54	mTSS	AAT	YPK_1869	gloA	lactoylglutathione lyase	1	0	1	0	0	0	15	6	12	4	4	0	0.39	3.90948e-10			0.37	0.000147219			0.000181238		8.67981e-11
YPK_TSS_422	NC_010465	+	2075217		59	mTSS	GAG	YPK_1870	sepC	Rhs family protein-like protein	0	1	0	0	1	0	0	10	1	2	12	9			0	4.66709e-10						0.00635194
YPK_TSS_423	NC_010465	+	2082041		343	mTSS	GTT	YPK_1876	rovA	transcriptional regulator, MarR family	1	1	0	0	0	0	66	32	3	4	2	0	0.05	3.94914e-62	0	1.89108e-25					0	0.000231649
YPK_TSS_424	NC_010465	+	2082307		77	mTSS	GTG	YPK_1876	rovA	transcriptional regulator, MarR family	1	1	0	0	0	0	47	81	3	1	1	0	0.41	5.52738e-11	0.08	2.67636e-32					0	1.67968e-11	1.10515e-05
YPK_TSS_425	NC_010465	+	2082340		44	mTSS	GAC	YPK_1876	rovA	transcriptional regulator, MarR family	1	1	1	1	1	0	65	73	18	13	5	2	0.43	9.00037e-18	0.5	5.74916e-05					0	1.77247e-07	1.44278e-08	0.0204151
YPK_TSS_426	NC_010465	-	2083622	2083621	196	mTSS	AAA	YPK_1877	slyB-2	17 kDa surface antigen	1	1	1	1	0	0	14	10	37	13	9	2	0.14	9.40586e-09	0	2.18302e-06	0.02	1.67825e-29	0	1.18479e-08	0.00178987	0.0169782	1.56082e-10	0.0366717
YPK_TSS_427	NC_010465	+	2085255		233	mTSS	GTG	YPK_1880	pdxH	pyridoxamine 5'-phosphate oxidase	0	1	0	1	0	0	5	119	8	64	4	2			0.07	1.56401e-120			0	0		0	1.57364e-06	2.38658e-08
YPK_TSS_428	NC_010465	+	2086262		130	mTSS	GAT	YPK_1881	tyrS	tyrosyl-tRNA synthetase	1	0	0	0	0	0	15	3	6	5	1	1	0.28	9.34594e-09							2.10544e-11		7.47284e-09
YPK_TSS_429	NC_010465	+	2087626		195	mTSS	GCC	YPK_1882	pdxY	pyridoxal kinase	1	1	1	1	1	1	37	160	57	20	204	82	0	2.64811e-31	0.08	4.37995e-151	0.01	1.49645e-44	0	1.7115e-21	0	0	0	0.0027315
YPK_TSS_430	NC_010465	-	2089381		35	mTSS	GTT	YPK_1883	gst	glutathione S-transferase domain	0	1	1	0	1	0	6	31	16	5	29	2			0.48	0.00854591						7.84081e-07	3.26198e-11
YPK_TSS_431	NC_010465	-	2090779		89	mTSS	GTA	YPK_1885		protein of unknown function DUF1282	0	1	0	1	1	1	0	90	0	10	24	11										0.00745531		0.00990718
YPK_TSS_432	NC_010465	-	2092548		67	mTSS	CTA	YPK_1886	tppB	amino acid/peptide transporter	1	0	1	0	0	0	25	1	16	0	0	0	0.1	2.22562e-27			0.18	2.02083e-15			1.31501e-11		3.17028e-10
YPK_TSS_433	NC_010465	-	2100081		26	mTSS	TTG	YPK_1892	sapA	extracellular solute-binding protein family 5	1	0	1	0	0	0	12	7	11	2	6	1	0.49	1.01748e-08			0.45	2.74036e-07			1.54005e-05		5.45368e-10
YPK_TSS_434	NC_010465	+	2101776		110	mTSS	GAA	YPK_1894	pspA	phage shock protein A, PspA	1	1	1	0	0	0	16	11	20	4	3	0	0.18	1.3464e-13	0	2.85894e-12	0.24	9.86595e-15			2.16731e-13		0
YPK_TSS_435	NC_010465	-	2107075		37	mTSS	GCC	YPK_1901		conserved hypothetical protein	1	1	1	1	1	1	22	47	69	167	41	25			0	7.43584e-50					1.18036e-14	4.64203e-07	0	0
YPK_TSS_436	NC_010465	+	2107336		39	mTSS	AGT	YPK_1902	tyrR	transcriptional regulator, TyrR	1	1	1	0	0	0	25	14	28	6	2	0	0.36	2.36144e-17	0	0	0.43	5.36156e-16			0	0.0113168	0
YPK_TSS_437	NC_010465	-	2109667		31	mTSS	GTG	YPK_1903	tpx	redoxin domain protein	0	0	0	0	1	0	98	118	76	21	172	10									0.00209887	0.00699366
YPK_TSS_438	NC_010465	-	2109674	2109673	38	mTSS	GAA	YPK_1903	tpx	redoxin domain protein	1	1	1	1	1	0	127	16	158	26	88	7	0.34	1.23066e-47					0.38	5.04521e-09	0.00894874	0.0468683	6.4157e-07
YPK_TSS_439	NC_010465	+	2111797		166	mTSS	TTT	YPK_1906	mppA	extracellular solute-binding protein family 5	0	0	0	1	0	0	0	3	3	12	7	5							0	1.56524e-07			0.00792429
YPK_TSS_440	NC_010465	-	2118580		34	mTSS	TTA	YPK_1912	ttcA	C32 tRNA thiolase	0	0	1	0	0	0	6	1	10	2	1	1									7.48035e-08		1.148e-10
YPK_TSS_441	NC_010465	-	2126114		22	mTSS	ATA	YPK_1918	ldhA	D-isomer specific 2-hydroxyacid dehydrogenase NAD-binding	1	1	0	0	0	0	28	30	23	16	2	1	0.43	6.50527e-05							0	3.58554e-05	0	0.0341867
YPK_TSS_442	NC_010465	-	2126157		65	mTSS	CTG	YPK_1918	ldhA	D-isomer specific 2-hydroxyacid dehydrogenase NAD-binding	0	1	1	1	0	0	9	16	26	17	2	1			0	3.9436e-10	0.09	5.06429e-17	0	1.04033e-12	3.94309e-10	0.0128471	0	0.00383982
YPK_TSS_443	NC_010465	-	2133162		49	mTSS	TTG	YPK_1924	acpD	NAD(P)H dehydrogenase (quinone)	1	0	1	0	0	0	18	4	15	3	4	6	0.2	1.1116e-14			0.33	1.59457e-06			0		0
YPK_TSS_444	NC_010465	-	2140030		103	mTSS	AGC	YPK_1929		acid shock protein	0	1	0	1	0	0	3	11	1	13	4	2			0	3.79149e-12					7.94076e-05
YPK_TSS_445	NC_010465	-	2149989		24	mTSS	GCT	YPK_1937	rstA	two component transcriptional regulator, winged helix family	1	1	1	1	0	0	25	20	22	27	8	2	0	7.806e-32					0.44	2.13814e-06	0	7.98095e-05	0	4.56756e-05
YPK_TSS_446	NC_010465	+	2150164		98	mTSS	GGT	YPK_1938		conserved hypothetical protein	0	1	0	1	0	0	3	15	8	21	5	8			0	4.73552e-13			0	9.45722e-20		0.0215458	9.79323e-10	0.0205295
YPK_TSS_447	NC_010465	-	2153383		67	mTSS	CTA	YPK_1940		protein of unknown function DUF1471	1	0	1	0	0	0	32	0	26	0	2	0	0.16	2.05877e-22			0.24	5.26349e-18			0		0
YPK_TSS_448	NC_010465	+	2153659		187	mTSS	GTT	YPK_1941	pntA	NAD(P) transhydrogenase, alpha subunit	1	1	0	0	0	0	22	10	9	4	4	1	0	5.73758e-23							3.57263e-10		2.81216e-07
YPK_TSS_449	NC_010465	-	2158815		25	mTSS	TAT	YPK_1944	fnr	transcriptional regulator, Crp/Fnr family	1	1	1	1	1	1	75	26	56	27	74	22	0.24	5.41936e-46	0	6.28809e-22	0.29	6.6828e-28	0.31	1.46679e-09	0	0.000836679	0	0.00299728
YPK_TSS_450	NC_010465	-	2159420		39	mTSS	GAA	YPK_1945	ogt	methylated-DNA--protein-cysteine methyltransferase	1	1	1	1	1	0	36	16	68	110	15	1	0.41	3.1381e-10							0	0.00156224	0	3.08789e-13
YPK_TSS_451	NC_010465	+	2164128		28	mTSS	GCC	YPK_1948	yrfG-2, yigB-2, yihX-2	HAD-superfamily hydrolase, subfamily IA, variant 1	1	0	0	0	0	0	19	1	5	0	1	0	0	1.51669e-21							0		1.87251e-08
YPK_TSS_452	NC_010465	-	2173190		56	mTSS	GTC	YPK_1954		conserved hypothetical protein	1	0	0	0	0	0	25	0	1	0	0	0									6.61369e-09
YPK_TSS_453	NC_010465	+	2178580		114	mTSS	ATT	YPK_1960		conserved hypothetical protein	0	0	0	1	0	0	1	0	3	31	0	0							0.24	1.35474e-12				0.00291707
YPK_TSS_454	NC_010465	+	2188538		38	mTSS	ATC	YPK_1971		hypothetical protein YPK_1971	0	0	0	1	0	0	6	5	4	10	1	0							0	9.50501e-08	9.38346e-06	0.0100584	0.000318825
YPK_TSS_455	NC_010465	+	2194757		2	lmTSS	ACA	YPK_1975		GAF modulated sigma54 specific transcriptional regulator, Fis family	0	1	1	1	0	0	1	40	20	21	4	1					0.06	5.40243e-20	0	6.10642e-15		0.00059977	0
YPK_TSS_456	NC_010465	+	2198222		59	mTSS	ACT	YPK_1978		protein of unknown function DUF1161	1	1	1	1	1	1	22	522	10	127	90	26	0.22	5.56945e-16			0.28	0.000664945			0	0	0	1.63847e-11
YPK_TSS_457	NC_010465	-	2202232		66	mTSS	GAA	YPK_1981	mlc	ROK family protein	0	0	0	1	0	0	3	11	8	40	0	0										0.00890417	1.78043e-12	0.000209238
YPK_TSS_458	NC_010465	-	2203286		27	mTSS	TTG	YPK_1982	ynfL	transcriptional regulator, LysR family	0	1	0	0	0	0	4	34	2	2	4	0									1.93022e-06	9.77874e-08	6.07857e-07
YPK_TSS_459	NC_010465	+	2203333		139	mTSS	GTT	YPK_1983	ynfM	major facilitator superfamily MFS_1	0	1	0	0	0	0	1	29	2	0	0	0			0	1.70275e-33						0.000644359
YPK_TSS_460	NC_010465	+	2208976		110	mTSS	GAT	YPK_1987		protein of unknown function DUF945	1	1	1	0	0	0	22	11	18	7	1	2	0.24	3.09324e-12	0	2.63201e-09	0.34	2.71579e-07			0	0.00874858	0
YPK_TSS_461	NC_010465	-	2211633		37	mTSS	CTC	YPK_1988		transcriptional regulator, GntR family	1	1	0	0	0	0	12	13	9	8	4	1	0	8.32576e-16	0.49	0.000369727					2.79038e-07	0.00542999	5.00139e-09
YPK_TSS_462	NC_010465	+	2211763	2211765	88	mTSS	CTA	YPK_1989		hypothetical protein YPK_1989	1	1	1	1	0	0	11	17	38	10	0	0	0.11	3.3361e-07	0	0.000147743	0.18	1.51281e-16	0	0.0103802		0.00425715
YPK_TSS_463	NC_010465	+	2214670		48	mTSS	GCA	YPK_1993	add	adenosine deaminase	1	0	1	0	0	0	15	7	23	7	4	4	0	2.02653e-11			0.16	3.68327e-14			2.95951e-06		0
YPK_TSS_464	NC_010465	-	2218227		59	mTSS	TCG	YPK_1995		oxidoreductase domain protein	1	1	1	0	1	0	13	19	17	7	24	1			0.3	2.75896e-07					3.47524e-14	0.000376743	0
YPK_TSS_465	NC_010465	-	2219367		139	mTSS	GTT	YPK_1996	araC	transcriptional regulator, AraC family	0	1	0	1	0	0	1	28	1	10	0	0							0	3.89511e-10		0.00934932
YPK_TSS_466	NC_010465	+	2233840		29	mTSS	GCT	YPK_2006	rnfA	electron transport complex, RnfABCDGE type, A subunit	1	1	1	0	0	0	33	19	12	7	3	0	0	6.15354e-40	0	1.79347e-20	0	7.74844e-13			0	0.00944904	9.12063e-11
YPK_TSS_467	NC_010465	+	2244864		38	mTSS	CGG	YPK_2016	rnb	exoribonuclease II	1	0	1	0	0	0	27	0	22	1	1	0									0		0
YPK_TSS_468	NC_010465	+	2247110		76	mTSS	ACC	YPK_2017	cstA-1	carbon starvation protein CstA	0	1	0	0	0	0	2	28	1	1	0	0
YPK_TSS_469	NC_010465	+	2252030		90	mTSS	GTG	YPK_2022	osmB	osmotically inducible lipoprotein B precursor	1	0	1	1	0	0	11	25	18	12	17	4	0	7.36547e-12			0.32	1.58945e-05	0	1.65528e-09	1.26171e-09	0.018158	0
YPK_TSS_470	NC_010465	-	2253736		35	mTSS	TTA	YPK_2024	pyrF	orotidine 5'-phosphate decarboxylase	1	1	1	1	1	0	60	29	80	20	16	2	0.33	2.06354e-42							0	0.00651517	0	0.0107183
YPK_TSS_471	NC_010465	-	2256103		25	mTSS	TTG	YPK_2027		protein of unknown function DUF1049	1	1	0	0	0	0	18	17	6	4	3	2	0.07	8.29024e-16	0	9.44662e-13					1.61679e-12	0.000768826	0.000150603
YPK_TSS_472	NC_010465	-	2256135		57	mTSS	AGG	YPK_2027		protein of unknown function DUF1049	0	0	0	1	0	0	7	9	0	15	4	1							0	4.34894e-13	0.000817397			0.0198285
YPK_TSS_473	NC_010465	-	2256231		153	mTSS	CAG	YPK_2027		protein of unknown function DUF1049	0	1	0	0	0	0	2	22	2	1	4	1			0	1.23674e-19
YPK_TSS_474	NC_010465	-	2261167		215	mTSS	GAC	YPK_2030	acnA	aconitate hydratase 1	0	0	0	1	0	0	0	9	1	17	5	3							0.44	2.70865e-06				0.0168832
YPK_TSS_475	NC_010465	-	2268360		35	mTSS	TCT	YPK_2036	sohB	peptidase S49 domain protein	1	1	1	0	1	0	19	10	14	9	14	1	0.33	1.05314e-07			0.23	6.82459e-07			0		0
YPK_TSS_476	NC_010465	+	2268445		52	mTSS	GAT	YPK_2037		short-chain dehydrogenase/reductase SDR	0	0	1	0	0	0	8	8	13	6	4	1											1.7496e-13
YPK_TSS_477	NC_010465	+	2276341		159	mTSS	GAA	YPK_2045	trpC	indole-3-glycerol-phosphate synthase., phosphoribosylanthranilate isomerase	1	1	0	1	0	0	12	10	9	10	3	2	0	3.65365e-16	0	9.62481e-14			0	0		0.00407294
YPK_TSS_478	NC_010465	+	2280262		139	mTSS	ATA	YPK_2048		transport-associated	0	1	0	1	1	1	1	17	1	11	22	10			0	1.54278e-09			0	1.31552e-08		0.0133719
YPK_TSS_479	NC_010465	-	2281525		28	mTSS	TAA	YPK_2049	ompW	OmpW family protein	0	0	1	0	0	0	0	3	12	5	0	0					0.11	2.3105e-12					0
YPK_TSS_480	NC_010465	+	2281949	2281951	34	mTSS	CTA	YPK_2050	yciC	protein of unknown function UPF0259	1	0	1	0	0	0	11	9	13	6	6	1	0	2.86493e-08			0.09	4.98375e-12			5.99618e-05
YPK_TSS_481	NC_010465	-	2286775		21	mTSS	TCA	YPK_2055	tonB-1	TonB family protein	1	0	0	0	0	0	125	6	6	4	1	0	0.34	1.9964e-74							0	0.011179	4.2655e-09
YPK_TSS_482	NC_010465	-	2288239		26	mTSS	CCG	YPK_2059		conserved hypothetical protein	0	1	1	0	0	0	6	27	29	4	0	0			0.27	3.79864e-18	0.09	6.84495e-27			3.08856e-06	0.000617063	0
YPK_TSS_483	NC_010465	-	2289121		149	mTSS	ACT	YPK_2061	ailB	virulence-related outer membrane protein	0	1	0	0	0	0	0	11	0	1	0	0			0.46	0.0068924						0.0120538
YPK_TSS_484	NC_010465	+	2289989		29	mTSS	GAC	YPK_2063	cls	phospholipase D/Transphosphatidylase	1	0	1	0	0	0	10	7	16	1	5	1	0.24	8.11568e-11			0.48	1.44488e-11					1.05464e-10
YPK_TSS_485	NC_010465	+	2291583		30	mTSS	AAT	YPK_2064		protein of unknown function DUF440	1	1	1	1	0	0	31	10	28	20	6	4					0.29	1.42231e-20			0	0.0063208	0
YPK_TSS_486	NC_010465	-	2298904		274	mTSS	ACT	YPK_2070	oppA	extracellular solute-binding protein family 5	1	1	0	0	0	0	16	25	7	2	3	0	0.16	1.92303e-14	0.35	1.31269e-12					1.56187e-05	0.000641858	0
YPK_TSS_487	NC_010465	+	2300748		233	mTSS	GTG	YPK_2072	adhE	iron-containing alcohol dehydrogenase	1	1	1	1	0	0	134	4	27	9	1	0	0.07	4.53668e-105	0	0.0304709	0.16	2.32879e-17	0	2.89054e-09	0		0	0.0424544
YPK_TSS_488	NC_010465	+	2300933		48	mTSS	TTC	YPK_2072	adhE	iron-containing alcohol dehydrogenase	1	1	0	0	0	0	197	22	4	3	8	0	0.42	2.74341e-59	0	1.86624e-17					0	0.0015781	2.13233e-07
YPK_TSS_489	NC_010465	+	2305710		37	mTSS	GAC	YPK_2074	hns	histone family protein nucleoid-structuring protein H-NS	1	1	1	1	1	0	410	82	233	49	24	2	0.3	0	0.36	5.06867e-28	0.33	6.92073e-123	0	7.65351e-43	0	4.0597e-07	0	0.00565127
YPK_TSS_490	NC_010465	-	2309281		23	mTSS	AGG	YPK_2078	rssB	response regulator receiver protein	0	0	0	1	0	0	2	9	6	14	5	4											2.05714e-07	0.00917588
YPK_TSS_491	NC_010465	+	2310507		85	mTSS	ACA	YPK_2079		SEC-C motif domain protein	1	1	1	1	0	0	18	43	22	47	8	3	0.33	3.35603e-17			0.38	9.47242e-15			1.39574e-06	0.000500771	0	0.0161377
YPK_TSS_492	NC_010465	+	2314519		29	mTSS	ACA	YPK_2085	xthA	exodeoxyribonuclease III	1	0	1	0	0	0	13	5	22	2	3	0	0.25	1.68628e-09			0.28	1.65998e-14			0		0
YPK_TSS_493	NC_010465	+	2320099		26	mTSS	ACT	YPK_2091	sppA	signal peptide peptidase SppA, 67K type	1	0	1	0	0	0	32	6	28	5	4	1	0.21	3.85094e-28			0.21	6.86186e-20			0	0.00960639	0
YPK_TSS_494	NC_010465	-	2324702		42	mTSS	TTG	YPK_2095	msrB	methionine-R-sulfoxide reductase	1	1	1	0	0	0	23	22	55	1	2	1	0.15	5.44265e-18	0	5.67662e-20	0.43	3.9648e-25			0	0.00069374	0
YPK_TSS_495	NC_010465	+	2324762		246	mTSS	ATC	YPK_2096	gapA	glyceraldehyde-3-phosphate dehydrogenase, type I	1	1	1	1	1	1	28	88	12	14	44	30			0.19	2.81367e-67	0.03	8.74211e-05			0	3.31378e-12	0	0.035106
YPK_TSS_496	NC_010465	+	2324833		175	mTSS	GTG	YPK_2096	gapA	glyceraldehyde-3-phosphate dehydrogenase, type I	1	1	1	1	0	0	21	16	35	14	3	2	0.06	4.05967e-06	0	2.38686e-07	0.14	9.50119e-12	0	9.62124e-11	1.48944e-10	0.0187868	0	0.03262
YPK_TSS_497	NC_010465	+	2324852		156	mTSS	AGG	YPK_2096	gapA	glyceraldehyde-3-phosphate dehydrogenase, type I	1	0	0	0	0	0	61	10	20	3	3	5									0		0
YPK_TSS_498	NC_010465	+	2324940	2324941	68	mTSS	ACG	YPK_2096	gapA	glyceraldehyde-3-phosphate dehydrogenase, type I	1	0	1	0	0	0	10	2	12	1	3	0									4.90025e-05		0.000619788
YPK_TSS_499	NC_010465	+	2324972		36	mTSS	AAC	YPK_2096	gapA	glyceraldehyde-3-phosphate dehydrogenase, type I	1	1	1	0	1	0	277	10	81	3	16	0			0	0.000407744					0	0.0158471	0
YPK_TSS_500	NC_010465	+	2326280		47	mTSS	ACT	YPK_2097		aldose 1-epimerase	1	1	1	1	1	0	40	42	38	36	10	7	0.38	1.20025e-09			0.5	2.19016e-11			0	1.41977e-06	0	0.0142827
YPK_TSS_501	NC_010465	-	2328079	2328078	34	mTSS	GCT	YPK_2098	mipA, yiaT	MltA-interacting MipA family protein	1	1	1	1	1	0	70	38	442	36	21	5	0.3	1.61281e-19			0.28	8.22727e-263			0	0.000906535	0	6.40953e-05
YPK_TSS_502	NC_010465	-	2328115		70	mTSS	TTC	YPK_2098	mipA, yiaT	MltA-interacting MipA family protein	1	0	1	0	0	0	11	3	53	2	0	0											0
YPK_TSS_503	NC_010465	-	2328197		152	mTSS	TAA	YPK_2098	mipA, yiaT	MltA-interacting MipA family protein	1	0	1	1	0	0	16	4	49	17	1	0	0	2.12226e-06			0.04	7.01572e-17	0	2.75201e-12	3.06007e-05		0	0.0372056
YPK_TSS_504	NC_010465	+	2331902		32	mTSS	TTC	YPK_2103		protein of unknown function DUF6 transmembrane	0	0	0	0	1	0	1	9	0	0	16	2
YPK_TSS_505	NC_010465	+	2338270		46	mTSS	AGT	YPK_2108	spoVR	SpoVR family protein	0	1	0	0	0	0	0	19	2	3	7	1										0.000891468
YPK_TSS_506	NC_010465	-	2340828		40	mTSS	CTA	YPK_2109	fadR	fatty acid metabolism transcriptional regulator FadR	1	1	1	1	0	0	27	15	13	16	4	3	0.33	4.10957e-16	0.37	4.63835e-05	0.35	2.03988e-06	0	3.24508e-16	0	0.000414336	0	0.0199388
YPK_TSS_507	NC_010465	+	2342812		30	mTSS	ACA	YPK_2111	dsbB	disulphide bond formation protein DsbB	1	1	0	1	0	0	22	21	9	11	6	4	0.49	2.08367e-08	0.34	1.27352e-10			0	1.72016e-12	0	0.000385014	2.73166e-06
YPK_TSS_508	NC_010465	-	2344171		26	mTSS	AAA	YPK_2113		conserved hypothetical protein	1	0	0	0	0	0	28	9	8	4	2	1	0.27	2.06246e-13							0		6.81736e-10
YPK_TSS_509	NC_010465	-	2351436	2351438	192	mTSS	TGC	YPK_2120		protein of unknown function DUF709	0	1	1	0	0	0	9	14	11	3	1	0			0	2.98168e-16	0	9.02172e-13					1.26617e-07
YPK_TSS_510	NC_010465	+	2351896		69	mTSS	GAA	YPK_2121	minC	septum site-determining protein MinC	1	1	0	1	0	0	16	13	8	13	4	1	0.14	3.8206e-14	0.41	0.00711662					0	0.0183204	3.73938e-08
YPK_TSS_511	NC_010465	-	2357030		63	mTSS	AAT	YPK_2125	fadD-1	AMP-dependent synthetase and ligase	0	1	0	1	0	0	0	22	0	13	0	0			0.28	1.56636e-05			0	6.56655e-06		0.00187967		0.0348638
YPK_TSS_512	NC_010465	-	2358243		28	mTSS	CAG	YPK_2126	slp, yeaY	outer membrane lipoprotein, Slp family	0	1	0	0	1	0	0	41	1	9	11	4			0	2.95848e-39						7.04225e-07
YPK_TSS_513	NC_010465	+	2365849	2365848;2365850	27	mTSS	TTA	YPK_2135	hexR	transcriptional regulator, RpiR family	1	1	1	1	0	0	22	16	15	18	3	1	0.32	1.57297e-09			0	1.16178e-12	0	2.78279e-09	4.96264e-05		7.96753e-11	0.000273523
YPK_TSS_514	NC_010465	-	2376124		225	mTSS	TTT	YPK_2144	ruvA	Holliday junction DNA helicase RuvA	1	0	1	0	0	0	16	5	14	4	1	1	0	2.21033e-14			0.19	9.85305e-09			0		0
YPK_TSS_515	NC_010465	-	2376910		183	mTSS	TGC	YPK_2145	ruvC	crossover junction endodeoxyribonuclease RuvC	1	0	0	1	0	0	25	2	9	11	6	6	0.24	5.22095e-08							0		0	0.0111613
YPK_TSS_516	NC_010465	+	2381803		31	mTSS	GCC	YPK_2150	yecN	conserved hypothetical protein	1	1	1	1	1	0	31	26	24	18	19	8	0	1.98788e-38	0	1.86246e-12	0	4.00846e-24	0	1.0097e-17	2.89828e-11	8.22409e-07
YPK_TSS_517	NC_010465	-	2385201		54	mTSS	TTC	YPK_2153	cutC	CutC family protein	0	1	0	0	0	0	7	41	10	3	2	1										3.17435e-12	4.38554e-14
YPK_TSS_518	NC_010465	-	2385328		181	mTSS	TGA	YPK_2153	cutC	CutC family protein	1	1	0	0	0	0	11	27	3	1	9	0	0.13	3.17047e-07	0	3.16078e-18					3.33314e-08	1.90741e-05	0.000185728
YPK_TSS_519	NC_010465	-	2385992		38	mTSS	TTC	YPK_2154	yecM	protein of unknown function DUF991	1	0	1	0	0	0	43	3	52	2	1	1									0		0
YPK_TSS_520	NC_010465	+	2386273		298	mTSS	AGC	YPK_2155	argS	arginyl-tRNA synthetase	1	0	0	0	0	1	6	0	1	1	2	3									7.09291e-06
YPK_TSS_521	NC_010465	+	2386543		28	mTSS	GTC	YPK_2155	argS	arginyl-tRNA synthetase	0	0	1	0	0	0	12	5	12	2	3	1									5.72261e-11		6.92068e-10
YPK_TSS_522	NC_010465	-	2399435		33	mTSS	ATT	YPK_2161	rimJ	GCN5-related N-acetyltransferase	0	0	0	0	1	0	0	2	0	0	39	0
YPK_TSS_523	NC_010465	-	2420142	2420141	-8	rmTSS	AGA	YPK_2180	hemA	glutamyl-tRNA reductase	1	1	1	0	0	0	22	10	16	3	5	1
YPK_TSS_524	NC_010465	+	2421749		332	mTSS	GTC	YPK_2183		hypothetical protein YPK_2183	1	1	1	0	0	0	34	12	46	2	1	0	0	7.08239e-26	0	6.94738e-12	0	6.52275e-36			0	0.00489473	0
YPK_TSS_525	NC_010465	-	2423780		90	mTSS	AGT	YPK_2185		conserved hypothetical protein	0	0	0	1	0	0	1	68	5	16	4	0							0.34	0.00122069		0.000475405		0.00381218
YPK_TSS_526	NC_010465	+	2433476		26	mTSS	GTC	YPK_2196		conserved hypothetical protein	0	1	1	0	0	0	6	15	16	1	2	1			0	0	0.49	2.61197e-06			4.01846e-11	0.00510282	0
YPK_TSS_527	NC_010465	+	2438097		84	mTSS	ATT	YPK_2200		hypothetical protein YPK_2200	0	1	1	1	1	1	0	215	310	12794	631	11410			0.49	0.00137372						0	0	0
YPK_TSS_528	NC_010465	-	2459937		63	mTSS	TTG	YPK_2219	ydjR	protein of unknown function DUF886	0	1	0	1	0	0	2	42	8	14	0	0			0.15	8.33094e-35			0	2.30759e-15		3.01042e-08	0
YPK_TSS_529	NC_010465	+	2462252		111	mTSS	GAT	YPK_2222	hutI	imidazolonepropionase	0	0	1	0	0	0	3	2	32	4	7	1					0.17	1.22099e-31					0
YPK_TSS_530	NC_010465	-	2481027		190	mTSS	TCT	YPK_2236		conserved hypothetical protein	0	1	0	0	1	0	2	47	4	6	26	2			0.17	8.82431e-36						7.90408e-07	5.3589e-09
YPK_TSS_531	NC_010465	-	2498349		293	mTSS	AAA	YPK_2251		periplasmic protein p19 involved in high-affinity Fe2+ transport	0	1	0	0	0	0	0	17	1	3	6	2			0	1.94739e-17						0.00640683
YPK_TSS_532	NC_010465	-	2503698		161	mTSS	GAA	YPK_2254	glsA-2	glutaminase	0	1	0	1	0	0	2	12	2	29	2	0			0	1.73303e-12			0	5.98978e-31		0.000761498		0.000238443
YPK_TSS_533	NC_010465	-	2511421		29	mTSS	CAA	YPK_2259		transcriptional regulator, LysR family	0	1	0	1	0	0	2	4	0	10	2	2			0	0.00321005
YPK_TSS_534	NC_010465	-	2543391		0	lmTSS	TGG	YPK_2295		protein of unknown function DUF497	1	1	1	1	1	1	85	152	55	78	151	29	0.21	1.08545e-71	0.39	2.2548e-88	0.28	6.46446e-42	0.45	5.29791e-22	0	0	0	7.74787e-11
YPK_TSS_535	NC_010465	-	2555798		54	mTSS	TCC	YPK_2310		transcriptional regulator, XRE family	0	0	0	1	0	0	6	16	17	19	3	1											7.359e-12
YPK_TSS_536	NC_010465	-	2555804		60	mTSS	CTA	YPK_2310		transcriptional regulator, XRE family	1	1	1	0	0	0	12	15	14	7	1	0	0.41	0.0026379			0.31	8.16321e-05			6.82719e-11	0.00254645	0
YPK_TSS_537	NC_010465	-	2588099		35	mTSS	GTG	YPK_2354	pgsA	CDP-diacylglycerol--glycerol-3-phosphate 3-phosphatidyltransferase	1	1	1	1	1	1	51	117	41	83	66	22	0.3	5.64811e-47							0	5.30192e-12	0	9.70092e-05
YPK_TSS_538	NC_010465	-	2590652		48	mTSS	TAA	YPK_2356	uvrY	two component transcriptional regulator, LuxR family	1	1	0	0	1	0	3	9	2	0	9	1	0	0.000957801	0	5.13542e-08						0.0101783
YPK_TSS_539	NC_010465	+	2591219		48	mTSS	ACT	YPK_2357		conserved hypothetical protein	1	1	1	0	1	0	51	23	25	7	10	2	0.2	1.26623e-36							0	0.00923789	0
YPK_TSS_540	NC_010465	-	2601452		74	mTSS	TTT	YPK_2366	efeU-2	high-affinity iron transporter	1	0	0	0	0	0	9	2	2	0	1	0	0	2.43221e-09							4.73657e-07
YPK_TSS_541	NC_010465	-	2603440		0	lmTSS	TGA	YPK_2368		conserved hypothetical protein	1	0	1	0	0	0	10	1	14	1	0	0					0.33	2.74222e-06			1.88688e-09		0
YPK_TSS_542	NC_010465	+	2603743		42	mTSS	GAA	YPK_2369	putA	delta-1-pyrroline-5-carboxylate dehydrogenase	1	0	1	0	0	0	14	0	14	1	0	0	0.16	7.08321e-07							4.40958e-05		5.22761e-12
YPK_TSS_543	NC_010465	+	2608296		-2	rmTSS	GGC	YPK_2371		conserved hypothetical protein	0	0	0	1	0	0	4	6	7	13	4	3							0	1.38326e-11	0.000145732	0.0136624	6.14557e-12	0.037123
YPK_TSS_544	NC_010465	-	2612627		8	lmTSS	AAA	YPK_2377	yedO	pyridoxal phosphate-dependent enzyme, D-cysteine desulfhydrase family	1	1	1	0	0	0	15	13	14	7	9	1			0	3.92765e-13					0.000294542	0.00943958	4.85715e-12
YPK_TSS_545	NC_010465	-	2614375		28	mTSS	ACT	YPK_2380	fliA	RNA polymerase, sigma 28 subunit, FliA/WhiG	1	0	0	0	0	0	21	0	0	0	0	0	0.5	6.20392e-05							0.000138
YPK_TSS_546	NC_010465	-	2614547		200	mTSS	TAG	YPK_2380	fliA	RNA polymerase, sigma 28 subunit, FliA/WhiG	1	0	0	0	0	0	11	0	0	2	0	0									0.00750883
YPK_TSS_547	NC_010465	-	2615868		65	mTSS	ACG	YPK_2381	fliC	flagellin domain protein	1	0	0	0	0	0	569	9	0	0	0	0	0.25	0							0
YPK_TSS_548	NC_010465	+	2616051		49	mTSS	CTT	YPK_2382	fliD	flagellar hook-associated 2 domain protein	1	0	0	0	0	0	16	0	0	0	0	0	0.3	2.91874e-07							3.12768e-09
YPK_TSS_549	NC_010465	+	2618558		25	mTSS	AAG	YPK_2385		transcriptional regulator, AraC family	1	0	0	0	0	0	11	0	0	2	2	1	0.11	1.24861e-08							1.10618e-09
YPK_TSS_550	NC_010465	+	2622807		120	mTSS	GAG	YPK_2387	alkA	HhH-GPD family protein	0	1	0	1	0	0	2	12	1	13	1	1			0	8.45342e-14						0.00468182		0.0236486
YPK_TSS_551	NC_010465	-	2624474		84	mTSS	ACA	YPK_2389		conserved hypothetical protein	1	1	1	1	1	1	44	67	91	58	44	39	0.36	1.0267e-34			0.23	2.23827e-57			8.09998e-12	1.05165e-07	0	8.29587e-09
YPK_TSS_552	NC_010465	-	2625255		118	mTSS	TGA	YPK_2390	fliE-2	flagellar hook-basal body complex subunit FliE	1	0	0	0	0	0	28	1	0	0	0	0	0.04	1.80591e-20							0
YPK_TSS_553	NC_010465	+	2625360		130	mTSS	GCC	YPK_2391	fliF-2	flagellar M-ring protein FliF	1	0	0	0	0	0	59	2	0	0	0	0	0.07	5.6266e-54							0
YPK_TSS_554	NC_010465	+	2632332		124	mTSS	AAT	YPK_2398	fliL	flagellar basal body-associated protein FliL	1	0	0	0	0	0	36	0	0	0	0	0	0.43	3.63604e-18							0
YPK_TSS_555	NC_010465	+	2637109		50	mTSS	ACA	YPK_2405		hypothetical protein YPK_2405	0	1	0	1	0	0	1	14	1	18	1	0							0	9.92439e-15		0.00120084
YPK_TSS_556	NC_010465	+	2646021		187	mTSS	ATG	YPK_2414		transcriptional regulator, DeoR family	0	0	1	0	0	0	7	1	14	2	1	1					0.27	1.01726e-11			1.25403e-07		9.44364e-14
YPK_TSS_557	NC_010465	-	2650117		96	mTSS	GGC	YPK_2416	flgK	flagellar hook-associated protein FlgK	1	0	0	0	0	0	20	0	0	0	0	0	0.11	5.16535e-15							2.35574e-09
YPK_TSS_558	NC_010465	-	2657845		27	mTSS	CCA	YPK_2425	flgB-2	flagellar basal-body rod protein FlgB	1	0	0	0	0	0	176	1	2	0	0	0	0.07	3.09935e-163							0
YPK_TSS_559	NC_010465	+	2657952		39	mTSS	ATG	YPK_2426	flgA-2	flagella basal body P-ring formation protein FlgA	1	0	0	0	0	0	33	0	0	0	2	0	0.32	3.64038e-21							0
YPK_TSS_560	NC_010465	-	2663030		229	mTSS	TCT	YPK_2429	invA	invasin	0	1	0	0	0	0	3	41	0	0	0	1			0	3.33105e-37						6.7774e-08
YPK_TSS_561	NC_010465	-	2666024		66	mTSS	CAT	YPK_2431	flhA-2	flagellar biosynthesis protein FlhA	1	0	0	0	0	0	15	0	0	0	1	0	0.39	7.03125e-07							1.65388e-11
YPK_TSS_562	NC_010465	+	2667597		53	mTSS	ATG	YPK_2433		conserved hypothetical protein	0	0	0	1	0	0	0	1	0	10	0	0							0	1.26605e-07
YPK_TSS_563	NC_010465	-	2670699		31	mTSS	TCT	YPK_2437	pcoC	copper resistance protein CopC	0	0	1	0	0	0	18	31	34	4	1	0					0.5	4.2787e-15			3.28409e-09		0
YPK_TSS_564	NC_010465	-	2670863		195	mTSS	ACG	YPK_2437	pcoC	copper resistance protein CopC	1	1	0	1	0	0	15	15	7	10	3	3	0	4.64328e-11	0	2.07842e-08					2.16024e-05	0.0137623	0.000709254
YPK_TSS_565	NC_010465	-	2671591		35	mTSS	TTT	YPK_2438	ftnA	ferroxidase	0	0	0	1	0	0	8	17	69	18	55	9									7.60919e-10	6.46445e-05	0	0.00190865
YPK_TSS_566	NC_010465	-	2671600	2671599	44	mTSS	AGT	YPK_2438	ftnA	ferroxidase	0	1	1	0	1	0	4	11	27	3	33	4			0	2.86726e-07	0.33	0.000142809				0.00115497	0.00110231
YPK_TSS_567	NC_010465	+	2671925		32	mTSS	ATC	YPK_2439	holE	DNA polymerase II beta subunit	0	0	1	0	0	0	7	9	22	3	9	3					0.32	1.15241e-09				0.0139262	0
YPK_TSS_568	NC_010465	+	2673482		37	mTSS	GCG	YPK_2441		conserved hypothetical protein	1	1	1	1	1	0	38	1157	59	41	259	8	0.07	4.58492e-44			0.09	4.61722e-58			0	0	0	0
YPK_TSS_569	NC_010465	-	2676024		54	mTSS	ACA	YPK_2442	ptrB	oligopeptidase B	1	0	1	0	0	0	10	4	16	9	2	2											1.56988e-08
YPK_TSS_570	NC_010465	-	2677096		-9	rmTSS	AAA	YPK_2444	yqfB	protein of unknown function DUF437	0	1	0	1	1	1	1	93	1	17	13	10			0.22	6.2111e-57						0		0.0126702
YPK_TSS_571	NC_010465	-	2677502		37	mTSS	TAT	YPK_2445		YebG family protein	0	0	1	0	0	0	7	1	13	0	0	0									3.23442e-07		5.39104e-13
YPK_TSS_572	NC_010465	-	2679004		63	mTSS	AAA	YPK_2446	dbpA	DEAD/DEAH box helicase domain protein	1	0	1	0	0	0	21	5	14	0	2	0									6.91423e-12		1.38352e-12
YPK_TSS_573	NC_010465	+	2682174		182	mTSS	ATA	YPK_2450		NUDIX hydrolase	0	1	0	0	0	0	6	23	6	7	7	3			0	2.57891e-26					1.41395e-05	0.000499789	0.000106521
YPK_TSS_574	NC_010465	+	2683152		531	mTSS	GCC	YPK_2451	sdaA	L-serine dehydratase 1	1	0	0	0	0	0	10	14	2	8	1	0	0	1.91534e-09							2.06408e-06	0.000725018
YPK_TSS_575	NC_010465	+	2695052		55	mTSS	AGC	YPK_2462	hpcR	transcriptional regulator, MarR family	1	1	1	1	1	0	13	21	15	21	22	6			0	6.43865e-26	0.36	2.00427e-12	0	1.84411e-24	0.00024373	0.00545842	2.71126e-13	0.0144744
YPK_TSS_576	NC_010465	-	2697467	2697466	247	mTSS	CTC	YPK_2463	yoaE	integral membrane protein TerC	1	1	1	0	0	0	42	36	15	9	5	3	0.16	1.09212e-39	0	1.04586e-40	0	3.28637e-11					4.13181e-07
YPK_TSS_577	NC_010465	+	2697752		179	mTSS	ACT	YPK_2464	manX	PTS system, mannose/fructose/sorbose family, IIB subunit	1	1	1	1	0	0	100	68	104	26	0	0	0.07	2.48123e-99	0	2.13522e-65	0.11	2.92427e-95	0	5.56794e-26	0	9.84876e-15	0	0.0305461
YPK_TSS_578	NC_010465	+	2697845		86	mTSS	TCA	YPK_2464	manX	PTS system, mannose/fructose/sorbose family, IIB subunit	0	1	0	0	0	0	2	27	1	0	3	0			0	2.23694e-17						0.0128048
YPK_TSS_579	NC_010465	+	2701574		201	mTSS	GTT	YPK_2468	yebN	protein of unknown function DUF204	1	0	1	0	0	0	18	6	11	4	1	2	0	6.08636e-22			0	2.35605e-13			0		0
YPK_TSS_580	NC_010465	-	2704854		43	mTSS	CTT	YPK_2469	fcuA	TonB-dependent siderophore receptor	1	0	0	0	0	0	17	1	0	0	0	0	0.41	1.25957e-05							1.29181e-10
YPK_TSS_581	NC_010465	+	2707432		26	mTSS	ATC	YPK_2471		conserved hypothetical protein	0	1	0	1	0	0	5	14	6	10	1	0			0	3.76759e-17			0	4.77399e-09		0.0123174	0	0.0229711
YPK_TSS_582	NC_010465	-	2708848		51	mTSS	CAT	YPK_2472	rrmA	rRNA (guanine-N(1)-)-methyltransferase	1	0	1	0	0	0	13	4	11	0	0	0	0.12	2.61214e-13			0	4.37702e-12			4.87872e-07		1.44384e-07
YPK_TSS_583	NC_010465	-	2710429		26	mTSS	GGT	YPK_2475		conserved hypothetical protein	1	1	1	1	1	1	1323	1078	1432	799	124	19	0.15	0	0.49	1.75856e-182	0.18	0	0.37	0	0	0	0	0
YPK_TSS_584	NC_010465	-	2713749		67	mTSS	GCA	YPK_2477	aroP-1	amino acid permease-associated region	1	0	1	0	0	0	21	0	19	0	0	0									1.41188e-08		0.00014445
YPK_TSS_585	NC_010465	-	2715139		29	mTSS	TCA	YPK_2480		conserved hypothetical protein	1	0	0	0	0	0	13	7	8	2	7	1	0.15	1.71924e-11							2.3887e-07		0.000203085
YPK_TSS_586	NC_010465	-	2716284	2716286	28	mTSS	TAT	YPK_2482		conserved hypothetical protein	0	1	0	1	0	0	9	13	3	13	3	0							0	1.79603e-09	5.19316e-06		3.26372e-06
YPK_TSS_587	NC_010465	-	2716653		73	mTSS	AGT	YPK_2483		hypothetical protein YPK_2483	1	1	1	1	1	1	25	3101	72	267	17	71	0.04	3.00532e-26			0.14	1.88743e-60			0	0	0	0
YPK_TSS_588	NC_010465	-	2717732		98	mTSS	GGA	YPK_2486		conserved hypothetical protein	0	1	0	1	1	0	0	13	0	13	27	3			0	9.92712e-13						0.0111813		0.029434
YPK_TSS_589	NC_010465	-	2717769		135	mTSS	CTT	YPK_2486		conserved hypothetical protein	0	0	0	0	1	0	0	1	0	3	10	3
YPK_TSS_590	NC_010465	+	2720952		56	mTSS	GCC	YPK_2489		YCII-related	0	0	1	0	0	0	5	7	26	8	4	1					0.2	1.02853e-18					0
YPK_TSS_591	NC_010465	+	2721503		179	mTSS	AGG	YPK_2490		protein of unknown function DUF980	0	0	0	1	0	0	0	0	0	20	0	0
YPK_TSS_592	NC_010465	-	2724022	2724020	106	mTSS	TGA	YPK_2491	thuR	transcriptional regulator, LacI family	0	1	1	1	0	0	6	22	16	21	0	1			0	3.23681e-25			0	2.82242e-20	3.66181e-08	0.000676764	0	0.033057
YPK_TSS_593	NC_010465	+	2732576		94	mTSS	AGA	YPK_2499	uhpA-2	two component transcriptional regulator, LuxR family	0	0	0	0	1	0	0	6	0	5	10	0
YPK_TSS_594	NC_010465	+	2732646		24	mTSS	TCT	YPK_2499	uhpA-2	two component transcriptional regulator, LuxR family	1	1	1	0	0	0	8	4	3	1	2	0	0.39	6.32619e-06	0	0	0.4	0.00416569			0.000140278
YPK_TSS_595	NC_010465	+	2735921		163	mTSS	TGT	YPK_2502		polysaccharide deacetylase	0	1	0	0	0	0	0	17	0	2	0	0										0.00636051
YPK_TSS_596	NC_010465	-	2742930		120	mTSS	ATT	YPK_2506	lldD	FMN-dependent alpha-hydroxy acid dehydrogenase	0	0	1	1	0	0	4	2	14	21	2	2					0.14	1.2519e-06					0
YPK_TSS_597	NC_010465	-	2746161	2746160	115	mTSS	AAA	YPK_2510	ucpA	short-chain dehydrogenase/reductase SDR	0	1	0	1	0	0	0	24	2	23	2	1			0	3.04314e-27			0	1.20632e-17
YPK_TSS_598	NC_010465	-	2748368		121	mTSS	TTG	YPK_2512		major facilitator superfamily MFS_1	0	1	0	0	0	0	0	21	1	2	1	1			0.35	2.24224e-11						0.000507993
YPK_TSS_599	NC_010465	-	2753026		51	mTSS	GCG	YPK_2514	yeeX	protein of unknown function DUF496	0	0	0	1	0	0	12	8	23	11	6	2							0	2.17948e-07	4.49646e-06	0.0116659	0	0.0304077
YPK_TSS_600	NC_010465	-	2753065		90	mTSS	TCT	YPK_2514	yeeX	protein of unknown function DUF496	0	0	1	0	0	0	5	0	13	0	3	1					0.45	0.0494946					1.81604e-12
YPK_TSS_601	NC_010465	-	2753142		167	mTSS	CGC	YPK_2514	yeeX	protein of unknown function DUF496	1	0	1	0	0	0	11	1	27	2	1	0	0	4.30487e-06			0.04	5.14463e-15			1.88122e-09		0
YPK_TSS_602	NC_010465	-	2760347		152	mTSS	AAT	YPK_2518		conserved hypothetical protein	1	0	0	0	0	0	21	0	0	0	0	0	0	5.76547e-11							1.98249e-06
YPK_TSS_603	NC_010465	-	2761597		57	mTSS	AAA	YPK_2519	ybdH	glycerol dehydrogenase	1	1	1	1	0	0	6	4	4	7	2	1	0.31	0.000352881	0	1.37159e-05							4.77793e-05
YPK_TSS_604	NC_010465	+	2761700		126	mTSS	TAC	YPK_2520	yphE-3, ytfR-3	ABC transporter related	0	0	0	1	0	0	0	3	0	10	1	2							0	1.72347e-11
YPK_TSS_605	NC_010465	-	2776294	2776295	65	mTSS	CAT	YPK_2535	gnd	6-phosphogluconate dehydrogenase, decarboxylating	1	1	1	1	1	0	146	41	562	24	14	3	0.16	2.35938e-46	0.49	2.72836e-10	0.35	5.86834e-118			0	6.34142e-07	0	0.000272503
YPK_TSS_606	NC_010465	+	2794386		224	mTSS	TTC	YPK_2549		integral membrane protein TerC	0	0	0	0	1	0	0	1	0	0	24	0
YPK_TSS_607	NC_010465	+	2794427		183	mTSS	AAC	YPK_2549		integral membrane protein TerC	0	1	1	0	0	0	5	16	12	2	3	1					0	2.35164e-12			3.11847e-06	0.0076057	0
YPK_TSS_608	NC_010465	-	2799769		58	mTSS	CGA	YPK_2552	udk	uridine kinase	1	0	1	0	0	0	13	9	10	0	9	1	0	1.21894e-08			0.06	5.83993e-05			4.61418e-11		7.55612e-13
YPK_TSS_609	NC_010465	-	2801108		40	mTSS	TTG	YPK_2553	mrp	putative ATPase Mrp	1	0	1	0	1	0	30	9	22	3	11	2					0.46	0.00231191			0		0
YPK_TSS_610	NC_010465	+	2801297	2801298	36	mTSS	GCC	YPK_2554	metG	methionyl-tRNA synthetase	1	1	1	0	0	0	14	19	31	3	8	4	0.15	2.66892e-09	0	1.24982e-16	0.38	1.81793e-13			4.00885e-06	0.0246173	1.96742e-07
YPK_TSS_611	NC_010465	-	2804445		126	mTSS	AAA	YPK_2555		conserved hypothetical protein	0	0	0	0	1	0	0	1	0	2	15	4
YPK_TSS_612	NC_010465	+	2810361		23	mTSS	CTG	YPK_2561	cdd	cytidine deaminase	1	0	1	0	0	0	26	0	12	0	0	0	0.3	2.36121e-14							0
YPK_TSS_613	NC_010465	+	2811586		38	mTSS	AAC	YPK_2562	sfcA	malate dehydrogenase (oxaloacetate-decarboxylating)	1	1	1	0	0	0	14	24	11	5	5	1									4.13644e-09	0.00704812	0
YPK_TSS_614	NC_010465	-	2818797		240	mTSS	GTT	YPK_2566	mglB	periplasmic binding protein/LacI transcriptional regulator	1	1	1	1	0	0	10	29	20	49	1	0	0.23	3.19298e-05	0	1.71599e-27	0.5	0.0312043	0.13	1.31271e-39	1.71162e-13	0.000696303	0	2.07841e-07
YPK_TSS_615	NC_010465	-	2818828		271	mTSS	TTT	YPK_2566	mglB	periplasmic binding protein/LacI transcriptional regulator	0	1	1	1	0	0	7	17	16	11	0	0			0	1.96337e-14	0.36	0.000475846	0	6.47329e-07	6.44087e-07	0.000685194	0
YPK_TSS_616	NC_010465	-	2821253		65	mTSS	AAA	YPK_2568	folE	GTP cyclohydrolase I	1	1	1	0	0	0	43	21	34	8	5	2	0.23	2.52395e-41	0	8.62803e-26	0.38	1.13546e-16			0	0.00795825	0
YPK_TSS_617	NC_010465	+	2824549		413	mTSS	GAA	YPK_2572	frmB, fghA	S-formylglutathione hydrolase	0	1	1	1	0	0	5	146	36	86	0	0			0.06	4.85165e-162	0.06	5.2656e-29	0.25	4.598e-56		0	0	1.96115e-11
YPK_TSS_618	NC_010465	-	2837147		63	mTSS	GAA	YPK_2581	ybiT	ABC transporter related	1	0	1	0	0	0	50	0	10	0	2	0	0.46	0.00288775							0
YPK_TSS_619	NC_010465	+	2876488		25	mTSS	AGT	YPK_2621	hspQ	heat shock protein HspQ	1	0	0	1	0	0	16	3	2	15	1	2	0.43	1.05321e-06					0	3.74452e-15	1.89506e-10			0.0138807
YPK_TSS_620	NC_010465	-	2877431		76	mTSS	CTC	YPK_2622	yccU	CoA-binding domain protein	0	1	0	0	0	0	3	12	8	0	6	2			0	6.95319e-13						0.00615309	2.40582e-06
YPK_TSS_621	NC_010465	+	2877555		116	mTSS	AAT	YPK_2623		conserved hypothetical protein	0	1	0	1	0	0	1	13	3	22	2	3										0.0125991		0.0374837
YPK_TSS_622	NC_010465	+	2877647		24	mTSS	AAG	YPK_2623		conserved hypothetical protein	1	1	1	1	1	0	20	31	18	26	26	7	0.19	3.19673e-17	0.43	1.05062e-10	0.28	8.00738e-13			0	3.80442e-05	0	0.042238
YPK_TSS_623	NC_010465	+	2878497		33	mTSS	CAA	YPK_2624	mgsA	methylglyoxal synthase	1	0	1	1	0	0	17	9	21	30	6	3	0.43	2.68862e-07							0	0.00800385	0	0.00304104
YPK_TSS_624	NC_010465	+	2881516		263	mTSS	ACT	YPK_2627		hypothetical membrane protein	0	0	0	1	0	0	0	8	5	30	0	0							0.34	2.51644e-19			2.63583e-06	0.000783613
YPK_TSS_625	NC_010465	-	2884723		69	mTSS	GTT	YPK_2628	tfoX	regulator of competence-specific genes	0	0	0	1	0	0	1	4	3	11	0	0											0.000105505
YPK_TSS_626	NC_010465	+	2885685		62	mTSS	ATT	YPK_2630	ompA	OmpA domain protein transmembrane region-containing protein	1	1	1	0	1	0	154	51	134	5	41	1			0.11	5.36884e-21					0	2.15615e-07	0
YPK_TSS_627	NC_010465	-	2888109	2888108	29	mTSS	AAG	YPK_2632	matP	Ter macrodomain organizer MatS-binding protein	1	1	1	1	0	0	44	34	47	15	7	3	0.5	2.26657e-16										0.0308074
YPK_TSS_628	NC_010465	+	2888260		160	mTSS	CTT	YPK_2633	lonH	Lon-like ATP-dependent protease	1	0	1	0	0	0	37	3	11	0	4	0									0		0.000111021
YPK_TSS_629	NC_010465	+	2891221		108	mTSS	ACG	YPK_2636	fabF-2	3-oxoacyl-(acyl-carrier-protein) synthase 2	1	1	1	0	0	0	3	7	6	1	1	0	0	0.00149517	0	6.73757e-07	0.27	0.00741973				0.00672348	4.50026e-09
YPK_TSS_630	NC_010465	-	2900798		28	mTSS	CAA	YPK_2641	rlmL	putative RNA methylase	1	0	0	0	0	0	10	1	1	0	0	0	0	4.97161e-07							1.58005e-05
YPK_TSS_631	NC_010465	-	2901152		382	mTSS	CCA	YPK_2641	rlmL	putative RNA methylase	0	0	1	0	0	0	2	1	5	0	0	0					0	2.82713e-05
YPK_TSS_632	NC_010465	-	2903797		45	mTSS	TTA	YPK_2644	pyrD	dihydroorotate oxidase	0	1	1	1	1	1	7	11	37	140	12	77			0.49	0.0435967	0.2	7.24981e-18	0.38	4.19091e-80		0.00989692	0	7.57503e-14
YPK_TSS_633	NC_010465	-	2904109		357	mTSS	ATT	YPK_2644	pyrD	dihydroorotate oxidase	0	0	0	1	0	0	2	4	3	11	5	1							0	5.5199e-06
YPK_TSS_634	NC_010465	-	2907108		105	mTSS	TAT	YPK_2645	pepN	aminopeptidase N	1	1	1	0	0	0	23	22	41	4	6	1			0	2.26064e-20	0.42	3.66631e-09			8.43416e-10	0.00253266	0
YPK_TSS_635	NC_010465	+	2907610		75	mTSS	TCA	YPK_2647	pncB	nicotinate phosphoribosyltransferase	0	0	0	1	0	0	6	8	5	11	9	1							0	1.35394e-13				0.0215801
YPK_TSS_636	NC_010465	+	2909196		184	mTSS	ATC	YPK_2648	asnC-1	asparaginyl-tRNA synthetase	1	1	1	0	1	0	44	20	26	7	22	1	0.06	2.0417e-38	0.37	5.44609e-11	0.07	3.99286e-19			0	0.000145224	0	0.0310225
YPK_TSS_637	NC_010465	+	2910984		94	mTSS	AGA	YPK_2649	ompF	porin Gram-negative type	1	1	1	1	1	0	1781	668	94	57	58	1			0.34	0	0.45	4.38596e-17			0	0	0	5.51596e-06
YPK_TSS_638	NC_010465	+	2912378		39	mTSS	GCT	YPK_2650	aspC	aspartate transaminase	1	1	1	0	0	0	11	29	49	0	6	1	0.22	0.00276659			0.15	2.25665e-30			0.000203937	0.00432152	0
YPK_TSS_639	NC_010465	-	2915181		83	mTSS	GCA	YPK_2653		protein of unknown function DUF882	1	0	1	0	0	0	4	2	4	2	0	0	0	0.00274022			0	0.0426517
YPK_TSS_640	NC_010465	-	2924334		423	mTSS	GTA	YPK_2657	mukF	chromosome segregation and condensation protein MukF	0	0	1	0	0	0	5	6	11	0	0	0					0	2.00949e-10					1.15317e-12
YPK_TSS_641	NC_010465	-	2927707		35	mTSS	TTT	YPK_2661		protein of unknown function DUF343	1	0	1	0	0	0	12	7	12	3	4	1	0.28	2.9701e-09							4.47601e-07	0.00654165	0
YPK_TSS_642	NC_010465	-	2928902		473	mTSS	GGC	YPK_2662	cspB-2	cold-shock DNA-binding domain protein	1	1	0	1	1	0	5	5	0	7	3	2			0	1.23459e-06			0	9.58532e-08
YPK_TSS_643	NC_010465	+	2929053		95	mTSS	GTA	YPK_2663		protein of unknown function DUF1338	0	1	0	1	0	0	0	27	1	22	0	0			0	2.62779e-29			0	8.44808e-23		0.00604328
YPK_TSS_644	NC_010465	-	2933323		27	mTSS	CTA	YPK_2665	msbA	lipid A ABC exporter, fused ATPase and inner membrane subunits MsbA	0	0	1	0	0	0	9	0	15	0	1	0					0.1	6.80366e-12			1.06041e-07		7.45007e-08
YPK_TSS_645	NC_010465	-	2935694		71	mTSS	TTC	YPK_2666	comEC	DNA internalization-related competence protein ComEC/Rec2	0	1	0	0	0	0	1	24	3	8	1	0			0	4.30525e-28						0.00180486
YPK_TSS_646	NC_010465	-	2938332		158	mTSS	TCT	YPK_2668	rpsA	ribosomal protein S1	1	1	1	0	0	0	232	15	134	1	2	0									0	0.000712895	0
YPK_TSS_647	NC_010465	-	2938523		349	mTSS	TCT	YPK_2668	rpsA	ribosomal protein S1	1	1	1	0	0	0	75	22	18	1	13	4	0.09	2.85666e-38	0	2.23761e-14	0.06	7.72839e-07			0	4.68262e-05	0
YPK_TSS_648	NC_010465	-	2939099	2939097	59	mTSS	CTC	YPK_2669	cmk	cytidylate kinase	1	1	1	0	0	0	54	21	10	9	14	3	0.05	4.14426e-43	0.24	2.29178e-06	0.07	0.000864059					8.1745e-09	0.0385983
YPK_TSS_649	NC_010465	-	2939174		134	mTSS	CAA	YPK_2669	cmk	cytidylate kinase	0	1	0	0	1	0	1	23	2	2	11	1			0	8.44266e-16						0.00129389
YPK_TSS_650	NC_010465	-	2941942		45	mTSS	CGG	YPK_2671	serC	phosphoserine aminotransferase	1	1	1	1	1	0	49	17	32	17	21	3	0.44	1.24365e-16	0	6.96377e-17					0	0.00707463	0	0
YPK_TSS_651	NC_010465	+	2949150		44	mTSS	TAG	YPK_2676	focA	formate/nitrite transporter	0	1	0	0	0	0	2	18	1	5	4	1			0	2.59468e-14						0.000950069
YPK_TSS_652	NC_010465	+	2949162		32	mTSS	GTG	YPK_2676	focA	formate/nitrite transporter	1	0	1	0	0	0	46	13	18	9	9	2	0	8.63716e-54			0.19	6.03233e-16			0	0.0143312	0
YPK_TSS_653	NC_010465	+	2953736		369	mTSS	GAT	YPK_2679	pflA	pyruvate formate-lyase activating enzyme	0	0	0	1	0	0	5	8	1	35	7	0										0.0128056		0.00193658
YPK_TSS_654	NC_010465	-	2956236		32	mTSS	CTT	YPK_2680		major facilitator superfamily MFS_1	0	0	1	0	0	0	5	5	11	0	1	0					0.09	1.25958e-08			0.000168128		3.35603e-09
YPK_TSS_655	NC_010465	-	2957949		214	mTSS	TAA	YPK_2681	serS	seryl-tRNA synthetase	1	1	1	0	1	0	27	14	13	8	20	7			0	1.52874e-10	0.04	3.13281e-06			0	0.0103852	0
YPK_TSS_656	NC_010465	-	2965016		338	mTSS	GAA	YPK_2686	lrp-2	transcriptional regulator, AsnC family	1	0	0	0	0	0	10	3	4	4	1	0	0.43	6.4787e-05							0.000736221		2.35286e-05
YPK_TSS_657	NC_010465	+	2965416		30	mTSS	ATT	YPK_2687	trxB	thioredoxin reductase	1	0	0	0	0	0	11	4	7	0	2	0									8.04481e-08		9.25512e-12
YPK_TSS_658	NC_010465	+	2966680		187	mTSS	TCG	YPK_2688	cydD	ABC transporter, CydDC cysteine exporter (CydDC-E) family, permease/ATP-binding protein CydD	1	1	1	1	0	0	11	28	12	12	2	3	0.2	7.68365e-07	0.23	4.23349e-19	0.12	6.83065e-08	0	4.6927e-13	1.84256e-10	8.95858e-06	9.23147e-13
YPK_TSS_659	NC_010465	+	2971419		36	mTSS	GGT	YPK_2691	infA	translation initiation factor IF-1	1	0	1	0	0	0	134	9	184	2	4	3									0	0.0255959	0
YPK_TSS_660	NC_010465	-	2974528		181	mTSS	AAC	YPK_2692	clpA	ATP-dependent Clp protease, ATP-binding subunit ClpA	1	0	1	0	0	0	19	16	19	18	30	12	0.31	1.04402e-10			0.11	9.54258e-10				0.0103444	1.49523e-12	0.023691
YPK_TSS_661	NC_010465	-	2974736		43	mTSS	AGG	YPK_2693	clpS	ATP-dependent Clp protease adaptor protein ClpS	0	0	1	0	0	0	23	15	24	18	8	3					0.25	1.71451e-08			0	0.0117545	0	0.0314913
YPK_TSS_662	NC_010465	-	2974770		77	mTSS	GAT	YPK_2693	clpS	ATP-dependent Clp protease adaptor protein ClpS	1	1	0	0	1	0	17	14	7	5	12	2			0.43	0.00476956					1.27885e-11	0.0117545	8.79239e-08
YPK_TSS_663	NC_010465	+	2974962	2974960	92	mTSS	GTG	YPK_2694	cspD-2	cold-shock DNA-binding domain protein	0	1	1	1	0	0	1	140	12	27	1	0			0.15	3.62938e-52	0.03	9.40118e-09				0.000214441	0
YPK_TSS_664	NC_010465	+	2981822	2981820	178	mTSS	ACA	YPK_2700		protein of unknown function DUF340 membrane	1	1	0	0	0	0	14	11	3	3	4	3	0	1.0239e-16	0	1.36962e-10
YPK_TSS_665	NC_010465	+	2986000		28	mTSS	TTC	YPK_2703	poxB	pyruvate dehydrogenase	1	1	1	1	1	1	12	39	41	12	40	20	0.15	1.09178e-11	0	4.59651e-39	0.04	2.37346e-38			0.000147481	7.48567e-08	0
YPK_TSS_666	NC_010465	+	2988120		36	mTSS	CGA	YPK_2705	ltaA	threonine aldolase	0	1	0	0	1	1	0	18	2	1	27	12			0	1.89423e-13						0.0123411
YPK_TSS_667	NC_010465	+	2988167		-11	rmTSS	TAT	YPK_2705	ltaA	threonine aldolase	0	0	1	1	0	0	7	33	19	21	6	3					0.47	9.69417e-12	0	4.24332e-23		0.000702595	9.04681e-12	0.0152578
YPK_TSS_668	NC_010465	-	3013292		244	mTSS	CCC	YPK_2732		protein of unknown function DUF1418	0	1	0	1	0	0	9	12	3	10	7	3			0	0			0	1.83304e-12		0.00657562	0	0.00992116
YPK_TSS_669	NC_010465	+	3013415		96	mTSS	AGT	YPK_2733	grxA	glutaredoxin, GrxA family	1	0	0	0	0	0	14	1	7	0	2	0	0.13	1.15975e-07							4.31954e-06		1.43386e-06
YPK_TSS_670	NC_010465	+	3017854		29	mTSS	AAT	YPK_2737	deoC-2	deoxyribose-phosphate aldolase	1	0	0	0	0	0	22	1	4	6	1	0	0.43	1.04775e-06							0		3.3083e-14
YPK_TSS_671	NC_010465	+	3018269		515	mTSS	TTG	YPK_2738	deoR	transcriptional regulator, DeoR family	0	1	0	0	1	0	5	24	5	3	24	5			0.37	4.13162e-14						0.00055737
YPK_TSS_672	NC_010465	+	3018753		31	mTSS	GAA	YPK_2738	deoR	transcriptional regulator, DeoR family	0	0	1	1	0	0	2	0	3	7	1	0					0	0.00150582
YPK_TSS_673	NC_010465	+	3020393		242	mTSS	ATC	YPK_2739	sdaC	serine transporter	1	0	0	0	0	0	20	4	6	2	0	0	0.4	0.000427262							0		2.48127e-10
YPK_TSS_674	NC_010465	-	3023746		131	mTSS	GAC	YPK_2740	dacC	serine-type D-Ala-D-Ala carboxypeptidase	1	1	1	1	1	0	15	14	34	14	23	6	0.26	1.37472e-10			0.21	1.18449e-21	0	4.21068e-15	2.6301e-13		0
YPK_TSS_675	NC_010465	-	3035174		5	lmTSS	TCT	YPK_2751	fhuD-4, fepB-4, fecB-4	periplasmic binding protein	1	0	0	0	0	0	61	2	1	0	0	0	0.27	1.92681e-44							0
YPK_TSS_676	NC_010465	-	3037053		111	mTSS	ATA	YPK_2752	lysP	amino acid permease-associated region	0	0	0	0	1	0	0	1	0	0	23	1
YPK_TSS_677	NC_010465	-	3038128		56	mTSS	TCA	YPK_2754		transcriptional regulator, LysR family	0	1	0	1	0	0	3	23	3	11	1	1										0.0196069	6.84486e-05
YPK_TSS_678	NC_010465	-	3038153		81	mTSS	TCA	YPK_2754		transcriptional regulator, LysR family	0	1	0	0	0	0	0	11	1	6	2	1			0	1.71438e-09						0.0196069
YPK_TSS_679	NC_010465	+	3039963		19	mTSS	GTT	YPK_2756	nfo	apurinic endonuclease Apn1	1	1	1	0	0	0	36	11	46	3	4	0	0.44	2.82552e-10	0	1.09071e-13					0		0
YPK_TSS_680	NC_010465	-	3046642		63	mTSS	TCA	YPK_2761	psaE	transcriptional regulator, CadC	0	1	0	1	0	1	1	248	8	56	3	10										0	4.97251e-11	1.34949e-05
YPK_TSS_681	NC_010465	-	3046657		78	mTSS	TTT	YPK_2761	psaE	transcriptional regulator, CadC	0	1	0	0	0	0	4	53	2	9	0	0										0.0409651
YPK_TSS_682	NC_010465	-	3059342		63	mTSS	TTA	YPK_2771	gabD-2	aldehyde dehydrogenase	0	1	0	0	0	0	0	11	3	2	0	1			0	9.33378e-11						0.00764233	5.75006e-05
YPK_TSS_683	NC_010465	+	3064574		34	mTSS	ACT	YPK_2777	efp-1	elongation factor P-like protein YeiP	1	0	0	0	0	0	18	0	8	0	0	0	0.37	9.59188e-11							4.77571e-13		3.15796e-09
YPK_TSS_684	NC_010465	-	3066750		237	mTSS	AGT	YPK_2778	uxuA	mannonate dehydratase	0	0	0	1	0	0	0	7	0	23	0	0							0	3.2695e-13		0.00702854		0.0419924
YPK_TSS_685	NC_010465	-	3069494		71	mTSS	TTC	YPK_2780	uxuR	GntR domain protein	1	0	0	0	0	0	11	3	5	2	0	0									2.66911e-11		4.93335e-06
YPK_TSS_686	NC_010465	-	3069940		25	mTSS	ACA	YPK_2781		conserved hypothetical protein	1	1	0	0	0	0	94	10	0	2	2	0	0.19	4.15626e-91	0	8.9026e-10					0
YPK_TSS_687	NC_010465	+	3071221		52	mTSS	CCC	YPK_2783		phosphoesterase PA-phosphatase related	1	0	0	0	0	0	12	1	8	0	0	0	0	2.44587e-13							3.4547e-06		3.19287e-08
YPK_TSS_688	NC_010465	+	3072179		237	mTSS	GTT	YPK_2784	spr	NLP/P60 protein	1	1	1	0	0	0	25	15	10	1	0	0	0	3.45064e-22	0	2.37599e-10	0	1.68156e-06			0	0.0184397	0
YPK_TSS_689	NC_010465	+	3072359		57	mTSS	GTT	YPK_2784	spr	NLP/P60 protein	1	1	1	1	0	0	42	150	58	21	0	0	0.11	5.73262e-30	0.26	3.00929e-68	0.15	6.13175e-39			0	0	0	0.0304028
YPK_TSS_690	NC_010465	+	3075206		42	mTSS	AGA	YPK_2786	yejA	extracellular solute-binding protein family 5	1	1	1	1	0	0	11	10	27	18	8	3			0	3.41377e-10	0.39	2.67413e-07	0.38	6.67696e-07	3.70662e-06	0.010105	0	0.0190005
YPK_TSS_691	NC_010465	-	3084506		300	mTSS	CAG	YPK_2793	rsuA	pseudouridine synthase	0	1	0	0	1	0	5	12	0	3	12	1			0	0					0.000519891	0.0116066
YPK_TSS_692	NC_010465	+	3086567	3086566	92	mTSS	GCT	YPK_2795	rplY	ribosomal protein L25	1	1	1	0	0	0	56	21	36	4	2	1	0	5.02109e-16	0	1.09287e-13	0.03	2.68733e-11			0	0.0213049	0
YPK_TSS_693	NC_010465	-	3088055		20	mTSS	GCC	YPK_2796	ndpA	nucleoid-associated protein NdpA	0	0	1	0	0	0	1	1	5	0	0	0
YPK_TSS_694	NC_010465	+	3088185		28	mTSS	ACT	YPK_2797	yejL	protein of unknown function DUF1414	1	1	1	0	0	0	10	13	10	3	4	1	0.47	0.00184422			0.27	1.43365e-05					1.21119e-05
YPK_TSS_695	NC_010465	+	3093417		51	mTSS	TGT	YPK_2804		conserved hypothetical protein	0	1	0	1	0	0	2	16	2	20	0	0			0	1.0245e-14								0.00375818
YPK_TSS_696	NC_010465	-	3112918		30	mTSS	ATT	YPK_2826		type III effector Hrp-dependent outers	0	0	1	1	0	0	9	3	21	12	0	0					0.22	1.25607e-20			2.21503e-08		0	0.0108622
YPK_TSS_697	NC_010465	+	3113852		0	lmTSS	ATG	YPK_2829		transcriptional regulator, XRE family	0	0	0	1	0	0	4	8	6	20	6	2									1.04383e-07		1.73439e-05	0.0170031
YPK_TSS_698	NC_010465	+	3114756		24	mTSS	GTA	YPK_2830	msgA	DinI family protein; putative stress response protein	0	0	1	0	0	0	9	1	10	1	0	1					0.09	6.21757e-11					8.60488e-10
YPK_TSS_699	NC_010465	+	3121455		178	mTSS	GTT	YPK_2836	ampH	beta-lactamase	0	0	0	0	1	0	2	1	2	2	18	0
YPK_TSS_700	NC_010465	+	3121526		107	mTSS	AAT	YPK_2836	ampH	beta-lactamase	0	1	0	0	0	0	6	13	4	4	2	1									0.000122967		2.89475e-05
YPK_TSS_701	NC_010465	+	3121607		26	mTSS	ACG	YPK_2836	ampH	beta-lactamase	1	0	0	0	0	0	16	1	6	0	2	0	0.15	9.90367e-14							6.14622e-07		1.10368e-08
YPK_TSS_702	NC_010465	+	3123978		57	mTSS	GCA	YPK_2838		transcriptional regulator, TetR family	0	0	1	0	0	0	6	3	10	2	0	0											0
YPK_TSS_703	NC_010465	-	3125863		68	mTSS	CCT	YPK_2839	ompC-2	porin Gram-negative type	0	0	1	0	0	0	4	0	438	5	3	1									1.61555e-05		0
YPK_TSS_704	NC_010465	+	3130486		287	mTSS	GAG	YPK_2843	rcsB	two component transcriptional regulator, LuxR family	1	1	1	1	1	0	29	44	33	54	31	5	0.22	4.38218e-05	0.12	9.51237e-20	0.05	2.59862e-08			0	2.92517e-08	0	0.000951234
YPK_TSS_705	NC_010465	+	3130569	3130570	204	mTSS	TCA	YPK_2843	rcsB	two component transcriptional regulator, LuxR family	1	1	1	1	1	0	262	85	294	61	80	6	0.07	4.9514e-212	0.16	1.30339e-47	0.07	5.08113e-201				0.0285132		7.07686e-06
YPK_TSS_706	NC_010465	-	3134388		21	mTSS	TTA	YPK_2844	rcsC	integral membrane sensor hybrid histidine kinase	0	1	0	0	0	0	9	12	3	1	2	1			0	7.14036e-10					1.10476e-08	0.010369
YPK_TSS_707	NC_010465	-	3137287		39	mTSS	CCT	YPK_2846	gyrA	DNA gyrase, A subunit	1	1	1	1	1	1	106	62	87	41	14	11	0.09	1.21868e-100	0.45	1.28995e-24	0.23	4.58553e-55			0	5.83822e-09	0	0.00268443
YPK_TSS_708	NC_010465	+	3137520		28	mTSS	CAA	YPK_2847	ubiG	ubiquinone biosynthesis O-methyltransferase	1	0	1	0	0	0	16	4	12	0	1	0									1.76406e-07		5.85508e-11
YPK_TSS_709	NC_010465	+	3138625		145	mTSS	GTC	YPK_2848	nrdA	ribonucleoside-diphosphate reductase, alpha subunit	1	0	1	0	0	0	33	2	18	0	0	0	0.44	2.23793e-16							0		0
YPK_TSS_710	NC_010465	-	3144428		22	mTSS	TGA	YPK_2852	cinA	competence/damage-inducible protein CinA	1	1	1	0	0	0	21	12	27	2	3	2	0.21	2.47891e-19			0.22	2.05892e-21			0	0.0003213	0
YPK_TSS_711	NC_010465	-	3147092		60	mTSS	GGA	YPK_2854		YfaZ family protein	0	0	0	0	1	0	1	3	2	0	42	0
YPK_TSS_712	NC_010465	+	3147272	3147271	121	mTSS	GAG	YPK_2855	katA	catalase	0	1	0	1	1	0	1	13	3	10	14	4			0	8.07142e-10						0.000766143	1.05593e-05
YPK_TSS_713	NC_010465	+	3153864		28	mTSS	GTT	YPK_2859		conserved hypothetical protein	1	1	0	0	0	0	22	18	9	5	5	1	0.09	1.68951e-20	0	6.94044e-16					0	0.00040546	0
YPK_TSS_714	NC_010465	+	3163187		56	mTSS	ACC	YPK_2866	ynjE, sseA	rhodanese domain protein	1	1	1	1	0	0	13	11	18	13	3	1	0.21	6.32383e-12			0.28	2.69314e-12	0	0.00285187	4.97523e-10	0.00367729	0
YPK_TSS_715	NC_010465	-	3166569		28	mTSS	TTT	YPK_2868		conserved hypothetical protein	0	0	0	0	1	0	0	2	0	0	18	1
YPK_TSS_716	NC_010465	-	3173373		81	mTSS	CTA	YPK_2874		protein of unknown function DUF1456	1	1	1	1	0	0	43	13	39	14	2	1	0	8.91139e-51	0	5.45407e-17	0.02	1.57871e-44	0	4.83026e-14	0	0.000199023	0
YPK_TSS_717	NC_010465	-	3177761		119	mTSS	TCA	YPK_2879		hypothetical protein	0	1	0	1	1	1	0	440	1	12	136	17			0.39	6.09916e-105			0	1.90105e-09		0
YPK_TSS_718	NC_010465	-	3177812		170	mTSS	TAC	YPK_2879		hypothetical protein	0	0	0	0	1	0	0	8	0	0	26	0
YPK_TSS_719	NC_010465	+	3179214	3179216	29	mTSS	GCA	YPK_2881		HNH endonuclease	1	1	1	0	0	0	11	17	20	4	1	0	0.09	4.16739e-06							6.23124e-09		4.98848e-05
YPK_TSS_720	NC_010465	-	3183170		7	lmTSS	CCA	YPK_2885	pbpG	peptidase S11 D-alanyl-D-alanine carboxypeptidase 1	1	0	1	0	0	0	36	0	48	4	2	1	0.08	1.04698e-35			0.3	2.88008e-27			0		0
YPK_TSS_721	NC_010465	-	3192594	3192593	129	mTSS	AAT	YPK_2898	rhlE-2	DEAD/DEAH box helicase domain protein	1	1	1	1	1	1	195	64	59	35	58	91	0.38	1.0013e-173	0.29	5.89471e-50	0.49	2.80878e-16	0	2.01956e-22			7.56819e-05	0.0252425
YPK_TSS_722	NC_010465	-	3217906		57	mTSS	ACG	YPK_2918	ybhL, ybhM, yccA	protein of unknown function UPF0005	1	1	1	1	1	0	74	71	58	30	26	4	0.06	7.17489e-75	0	3.27263e-58	0.09	2.7725e-50	0	7.49052e-26	0	5.76144e-13	0	0.00271476
YPK_TSS_723	NC_010465	-	3220708		217	mTSS	GAA	YPK_2922	moaA	molybdenum cofactor biosynthesis protein A	0	1	0	0	0	0	0	10	0	0	1	2			0	7.78086e-07
YPK_TSS_724	NC_010465	-	3224697		68	mTSS	GCA	YPK_2926	uvrB	excinuclease ABC, B subunit	1	0	1	0	0	0	19	3	11	1	0	0	0.19	4.13536e-15			0.25	0.000192648			2.5882e-09		9.10459e-11
YPK_TSS_725	NC_010465	-	3230338		28	mTSS	CTT	YPK_2931	bioB	biotin synthase	0	1	0	0	0	0	1	11	0	0	0	0			0	2.40885e-12
YPK_TSS_726	NC_010465	-	3232960		81	mTSS	TAT	YPK_2933	pgl	6-phosphogluconolactonase	1	1	1	1	0	0	26	55	55	20	5	0									0	8.26861e-08	0	0.0163329
YPK_TSS_727	NC_010465	-	3232981		102	mTSS	AAA	YPK_2933	pgl	6-phosphogluconolactonase	0	1	0	0	0	0	8	10	3	1	1	1									0.00342427	0.0341163	0.000990316
YPK_TSS_728	NC_010465	-	3236659		65	mTSS	ACC	YPK_2937	modA-1	molybdenum ABC transporter, periplasmic molybdate-binding protein	1	0	0	0	0	0	14	0	0	0	0	0	0	2.41939e-13							1.3021e-09
YPK_TSS_729	NC_010465	-	3237013	3237012	32	mTSS	ATC	YPK_2938		conserved hypothetical protein	1	1	1	0	1	0	31	14	39	3	32	3	0.44	5.73892e-19	0	3.8357e-08	0.31	7.75697e-15				0.0220637
YPK_TSS_730	NC_010465	-	3237083		102	mTSS	TTA	YPK_2938		conserved hypothetical protein	1	1	1	0	0	0	12	10	36	3	4	1	0.13	3.72941e-07	0	4.21105e-05	0.15	7.05346e-20			1.63517e-06	0.0220637	0
YPK_TSS_731	NC_010465	+	3245563		89	mTSS	ATC	YPK_2947	psiF	PsiF repeat protein	0	1	0	0	1	0	0	28	1	0	10	0			0	1.07944e-29						0.00739485
YPK_TSS_732	NC_010465	-	3248335		15	mTSS	TTA	YPK_2949	aroG	phospho-2-dehydro-3-deoxyheptonate aldolase	0	0	0	1	0	0	7	11	10	18	9	3									0.00095216	0.00994911	8.72071e-13
YPK_TSS_733	NC_010465	-	3248354		34	mTSS	TGC	YPK_2949	aroG	phospho-2-dehydro-3-deoxyheptonate aldolase	1	0	1	1	0	0	8	0	15	5	0	0	0.3	0.00139567			0.27	3.3686e-09	0	0.000510111	1.56703e-05		7.92023e-07
YPK_TSS_734	NC_010465	-	3254547		259	mTSS	TCT	YPK_2955	pal	peptidoglycan-associated lipoprotein	1	1	1	1	1	1	1215	203	1550	2236	455	5665			0.36	1.39065e-111	0.39	0	0.17	0	0	0	0	0
YPK_TSS_735	NC_010465	-	3255669		38	mTSS	ATT	YPK_2956	tolB	Tol-Pal system beta propeller repeat protein TolB	1	1	1	1	0	0	30	22	49	41	8	8	0.2	5.15831e-16	0.35	6.32081e-11	0.28	1.85214e-26	0.29	1.18233e-18	0	0.000351501	0	1.33398e-06
YPK_TSS_736	NC_010465	-	3258582		25	mTSS	TTA	YPK_2960	ybgC	acyl-CoA thioester hydrolase YbgC	1	1	1	1	1	1	189	198	122	59	212	74	0.17	3.67175e-170	0.12	7.24259e-158	0.11	2.20942e-109			0	0	0	0.000211754
YPK_TSS_737	NC_010465	-	3258679		122	mTSS	GCA	YPK_2960	ybgC	acyl-CoA thioester hydrolase YbgC	0	1	0	0	0	0	5	41	2	6	0	0									0.000351931	0.0020671
YPK_TSS_738	NC_010465	-	3258782		225	mTSS	TTT	YPK_2960	ybgC	acyl-CoA thioester hydrolase YbgC	0	1	0	0	0	0	3	14	2	0	2	0			0	0.000147949						0.0241192
YPK_TSS_739	NC_010465	-	3259038		17	mTSS	CTG	YPK_2961		cyd operon protein YbgE	0	1	0	0	1	0	11	40	11	7	30	2			0	1.64072e-32					1.19164e-10	1.31259e-07	3.25601e-15
YPK_TSS_740	NC_010465	-	3268960		146	mTSS	AGG	YPK_2968	sucA, kgd	2-oxoglutarate dehydrogenase, E1 subunit	1	1	1	1	1	1	262	430	717	33	154	24	0.49	5.11767e-65	0.24	0	0.35	8.02319e-210			0	0	0	0.0179098
YPK_TSS_741	NC_010465	-	3268985		171	mTSS	AAG	YPK_2968	sucA, kgd	2-oxoglutarate dehydrogenase, E1 subunit	0	1	1	0	0	0	6	11	19	1	3	1									4.42329e-06	0.0133769	0
YPK_TSS_742	NC_010465	-	3272596		163	mTSS	GGT	YPK_2972	sdhC	succinate dehydrogenase, cytochrome b556 subunit	1	1	1	1	1	1	176	237	396	115	20	15	0.38	2.38568e-108	0.06	0	0.29	0	0.38	7.42879e-46	0	0	0	7.50716e-16
YPK_TSS_743	NC_010465	+	3272755		388	mTSS	AGA	YPK_2973	gltA	citrate synthase I	1	1	1	1	0	0	11	10	20	32	5	4	0.18	1.108e-05	0	2.61072e-08					3.75131e-10		0	0.00102997
YPK_TSS_744	NC_010465	+	3272831		312	mTSS	AGT	YPK_2973	gltA	citrate synthase I	1	0	1	0	0	0	11	4	11	9	8	4					0.49	0.0160129					8.5434e-09
YPK_TSS_745	NC_010465	+	3272880		263	mTSS	ATC	YPK_2973	gltA	citrate synthase I	1	0	1	0	0	0	13	9	37	1	7	3									1.50556e-10		0
YPK_TSS_746	NC_010465	-	3275143		34	mTSS	TAG	YPK_2974	grpE	GrpE protein	1	0	1	0	0	0	166	7	88	1	1	1	0.29	1.11618e-63							0	0.00782469	0
YPK_TSS_747	NC_010465	+	3277902		74	mTSS	GCC	YPK_2977	bamE, smpA	outer membrane protein assembly factor BamE	0	0	1	0	0	0	1	6	26	3	1	4					0.04	8.38234e-18					0
YPK_TSS_748	NC_010465	+	3277949	3277950	27	mTSS	CCT	YPK_2977	bamE, smpA	outer membrane protein assembly factor BamE	1	0	1	0	0	0	27	9	10	2	5	0					0.27	0.00136203					4.90971e-08
YPK_TSS_749	NC_010465	-	3279202		24	mTSS	TTT	YPK_2979		cyclase/dehydrase	1	1	1	0	0	0	30	23	36	4	8	2	0.23	2.87676e-29	0.41	2.96015e-15	0.4	3.34939e-34			3.24034e-15	0.00499032	0
YPK_TSS_750	NC_010465	+	3279335	3279336	-8	rmTSS	TAC	YPK_2980	smpB	tmRNA/SsrA-binding protein, determines stability of RNase R	1	1	1	0	1	0	90	12	37	68	17	8	0.25	2.30468e-51			0.07	8.18373e-29
YPK_TSS_751	NC_010465	+	3283583		181	mTSS	GCT	YPK_2989		CopG domain protein DNA-binding domain protein	1	0	0	0	0	0	16	3	8	1	0	0	0	0
YPK_TSS_752	NC_010465	+	3283583		167	mTSS	GCG	YPK_2989		CopG domain protein DNA-binding domain protein	0	0	1	1	1	1	2	2	10	12	4	3					0	5.22902e-08	0	2.02098e-12			4.24493e-08	0.0286873
YPK_TSS_753	NC_010465	+	3284402		52	mTSS	AAT	YPK_2990	fldA	flavodoxin	0	0	1	0	0	0	14	5	19	9	2	0					0.24	2.8343e-05			0	0.0102426	0
YPK_TSS_754	NC_010465	+	3285221		127	mTSS	GTT	YPK_2991	fur	ferric uptake regulator, Fur family	1	1	1	1	1	0	31	71	12	31	24	4	0.22	1.14338e-08	0.12	3.69443e-53			0	1.99283e-26	0	9.14364e-10	0	0.000901083
YPK_TSS_755	NC_010465	+	3285269		79	mTSS	GCA	YPK_2991	fur	ferric uptake regulator, Fur family	1	0	0	0	0	0	19	1	5	2	1	0	0	8.48204e-10							0		0.000907776
YPK_TSS_756	NC_010465	-	3293065		33	mTSS	TGT	YPK_2994	glnS	glutaminyl-tRNA synthetase	1	0	1	0	0	0	31	4	39	1	2	0									2.00246e-15		0
YPK_TSS_757	NC_010465	-	3296126		135	mTSS	AGT	YPK_2996	nagE	PTS system, N-acetylglucosamine-specific IIBC subunit	1	1	1	0	0	0	44	10	290	5	0	0	0.45	2.29138e-21							0	0.000112047	0
YPK_TSS_758	NC_010465	+	3296255		135	mTSS	AAA	YPK_2997	nagB	glucosamine-6-phosphate isomerase	1	0	1	0	0	0	14	2	14	4	0	0	0.21	1.36773e-07							1.12216e-12		6.80987e-11
YPK_TSS_759	NC_010465	+	3299476	3299475	195	mTSS	CAA	YPK_3000	nagD	HAD-superfamily hydrolase, subfamily IIA	1	1	1	1	0	1	36	26	37	22	8	10	0.28	9.99717e-20	0	2.40825e-29	0.16	5.60687e-31	0	3.79956e-18	0	0.0023596	0	0.00329922
YPK_TSS_760	NC_010465	+	3306949		152	mTSS	AAT	YPK_3006	phoH, phoL	PhoH family protein	1	1	1	1	0	0	4	8	5	8	0	1			0	3.85832e-05	0.32	0.036576	0	6.23844e-05			2.29749e-05
YPK_TSS_761	NC_010465	+	3307014		87	mTSS	ATG	YPK_3006	phoH, phoL	PhoH family protein	1	1	1	1	0	0	20	16	23	22	7	2	0.15	3.33656e-16	0	1.93922e-11					1.69431e-07	0.00740094	0
YPK_TSS_762	NC_010465	+	3309592		56	mTSS	TCA	YPK_3009	lnt	apolipoprotein N-acyltransferase	1	1	1	1	1	1	56	163	185	21	238	17	0.05	5.98021e-53	0.44	3.56178e-39	0.49	3.31765e-31			0	0	0	0.0463769
YPK_TSS_763	NC_010465	+	3311778		198	mTSS	ATA	YPK_3010	ybeJ/gltI	extracellular solute-binding protein family 3	0	1	0	1	0	0	1	74	2	42	3	0			0.4	4.95289e-07			0.22	5.39056e-14		7.06238e-11	0.000306291	0.000864952
YPK_TSS_764	NC_010465	+	3311800		176	mTSS	GAA	YPK_3010	ybeJ/gltI	extracellular solute-binding protein family 3	0	1	1	0	0	0	9	241	34	100	1	0			0.13	7.06585e-135	0.24	7.69452e-15			3.3817e-08	0	0	1.31991e-09
YPK_TSS_765	NC_010465	-	3315849		27	mTSS	TCA	YPK_3014		protein of unknown function DUF1451	0	1	1	0	0	0	4	31	20	3	8	4			0	1.43355e-31	0.49	3.73973e-07				0.000393342	0
YPK_TSS_766	NC_010465	+	3316012	3316011	72	mTSS	ATC	YPK_3015	leuS	leucyl-tRNA synthetase	1	0	1	0	0	0	26	5	17	3	7	0									0		1.30672e-13
YPK_TSS_767	NC_010465	+	3321111		99	mTSS	ATC	YPK_3019	ybeB	ribosome-associated protein	1	0	1	0	0	0	11	0	5	1	1	0									4.79792e-07		7.96041e-06
YPK_TSS_768	NC_010465	+	3321237		294	mTSS	GTT	YPK_3020	rlmH	rRNA large subunit methyltransferase	0	1	1	1	1	1	2	35	54	17	35	274					0.02	1.95815e-48	0	1.4128e-17		0.00751993	0
YPK_TSS_769	NC_010465	+	3326733		38	mTSS	GTT	YPK_3024	dacA	serine-type D-Ala-D-Ala carboxypeptidase	1	0	1	0	0	0	33	8	45	0	7	0	0.27	8.50347e-14			0.37	1.65117e-07			0	0.00666459	0
YPK_TSS_770	NC_010465	+	3328629		17	mTSS	ACC	YPK_3026	lipB	lipoate-protein ligase B	1	1	1	1	1	0	97	29	44	16	10	2	0.19	7.75846e-87					0	1.64924e-17	0	3.16113e-05	0	0.0254624
YPK_TSS_771	NC_010465	-	3331045		102	mTSS	AAT	YPK_3028	tatE	twin-arginine translocation protein, TatA/E family subunit	1	0	1	0	1	0	10	2	16	0	15	1	0.11	3.44481e-10							9.73934e-11		0
YPK_TSS_772	NC_010465	-	3332568		43	mTSS	ACA	YPK_3031	cspE	cold-shock DNA-binding domain protein	1	1	1	1	0	0	19	170	200	42	8	1	0	3.67408e-10	0.34	1.542e-65	0.09	0	0.4	7.65067e-20	0.000429287	1.96733e-08	0	7.56926e-06
YPK_TSS_773	NC_010465	+	3334426		167	mTSS	GCT	YPK_3034		conserved hypothetical protein	1	1	0	1	0	0	10	55	4	37	3	3	0	1.07988e-12	0	3.17805e-66					4.60164e-09	2.17967e-08	1.91211e-08	0.000171393
YPK_TSS_774	NC_010465	-	3336152		21	mTSS	AAA	YPK_3035		conserved hypothetical protein	1	1	1	1	0	0	54	107	83	143	0	0	0	2.94433e-66	0.06	9.37769e-98	0.03	2.91109e-92	0.05	4.08112e-139	0	0	0	0
YPK_TSS_775	NC_010465	-	3349143		119	mTSS	AAG	YPK_3046	iolG	inositol 2-dehydrogenase	0	1	0	0	0	0	1	26	3	2	0	0										4.17611e-06
YPK_TSS_776	NC_010465	+	3353143		19	mTSS	ATG	YPK_3051		transcriptional regulator, RpiR family	1	1	1	1	1	0	19	10	19	31	12	9	0.24	5.45912e-17							0	0.00297398	1.84936e-15	0.0263095
YPK_TSS_777	NC_010465	-	3374802		16	mTSS	TTT	YPK_3069	rluF	pseudouridine synthase	1	1	1	0	0	0	6	4	3	0	1	0			0	2.53008e-05					5.93336e-05
YPK_TSS_778	NC_010465	+	3392923		125	mTSS	ACT	YPK_3087		conserved hypothetical protein	1	1	1	1	1	0	29	71	35	25	24	3	0.1	2.95209e-34	0.11	2.3104e-56	0.24	4.98967e-33			6.97391e-12	4.51823e-10	0
YPK_TSS_779	NC_010465	-	3399098		269	mTSS	CTC	YPK_3094		protein of unknown function DUF1983	0	1	0	0	0	0	9	19	3	6	5	3			0.32	1.45137e-07					9.16226e-08	0.00154766
YPK_TSS_780	NC_010465	-	3400482	3400481	92	mTSS	AGA	YPK_3097		conserved hypothetical protein	1	1	1	1	1	1	65	43	95	32	76	65	0.46	3.13077e-30	0.13	7.81638e-14	0.41	3.3365e-25				1.19704e-06		0.0374637
YPK_TSS_781	NC_010465	+	3402788		0	lmTSS	ATG	YPK_3102		transcriptional regulator, XRE family	1	1	1	1	1	0	21	13	24	13	13	6	0.29	1.51466e-11							0	0.0075113	0	0.0198105
YPK_TSS_782	NC_010465	+	3404146		-12	rmTSS	GAT	YPK_3104		conserved hypothetical protein	0	1	0	1	0	0	6	26	7	22	1	1			0	4.42024e-24			0	1.21371e-20	5.52653e-07	5.14936e-07	5.68124e-16	0.000887512
YPK_TSS_783	NC_010465	+	3406827		23	mTSS	GTT	YPK_3108		DinI family protein	1	0	1	0	0	0	11	1	13	0	1	0	0.28	1.44757e-08							2.47909e-07		3.60642e-13
YPK_TSS_784	NC_010465	+	3439316		27	mTSS	TCA	YPK_3146		conserved hypothetical protein	0	1	1	0	0	0	8	14	12	4	1	0			0	9.87394e-16	0.15	3.33453e-10			1.36485e-09	0.00888131	0
YPK_TSS_785	NC_010465	-	3445261		65	mTSS	TAT	YPK_3149		integrase family protein	0	0	1	1	0	0	4	1	11	10	0	1							0	0.000176066			4.14062e-10
YPK_TSS_786	NC_010465	+	3445646		38	mTSS	GAT	YPK_3150	folD	methenyltetrahydrofolate cyclohydrolase	1	0	1	1	0	0	13	3	13	11	1	0					0.45	1.3567e-07	0	0	1.2017e-14		2.95885e-09
YPK_TSS_787	NC_010465	+	3446410		155	mTSS	GAT	YPK_3151	ybcJ	ribosome-associated protein	1	1	1	0	0	0	26	19	23	2	3	1	0.16	1.13845e-17	0	2.78787e-19	0.11	3.64569e-12			7.84054e-05	0.00736658	0
YPK_TSS_788	NC_010465	+	3448539		56	mTSS	CTA	YPK_3153	ppiB	peptidyl-prolyl cis-trans isomerase cyclophilin type	1	0	1	0	0	0	48	4	34	1	5	0	0.39	3.95887e-11							0		0
YPK_TSS_789	NC_010465	+	3448998		102	mTSS	AAA	YPK_3154	lpxH	UDP-2,3-diacylglucosamine hydrolase	1	1	1	1	1	0	111	35	152	30	40	7	0.46	6.20014e-25	0	5.98225e-25	0.39	8.86403e-23			0	5.47326e-05	0
YPK_TSS_790	NC_010465	+	3456700		25	mTSS	TTA	YPK_3161	ybbN	thioredoxin domain	1	0	0	1	0	0	14	0	3	13	1	2	0	5.89266e-11					0	1.12176e-07	1.19996e-08		1.52489e-05
YPK_TSS_791	NC_010465	+	3457759		30	mTSS	ACA	YPK_3162		hypothetical protein	1	1	0	0	0	0	12	16	2	5	3	0	0.12	1.17083e-09	0	5.90772e-15					1.27761e-08	0.00759523
YPK_TSS_792	NC_010465	-	3459790		36	mTSS	AAA	YPK_3164	cueR	transcriptional regulator, MerR family	0	0	0	1	0	0	3	7	4	23	2	3							0.31	4.42745e-13			5.47658e-06	0.000724001
YPK_TSS_793	NC_010465	+	3459919		42	mTSS	GTG	YPK_3165	atcU	copper-translocating P-type ATPase	0	1	0	0	0	0	1	5	0	1	2	0			0	4.66732e-05
YPK_TSS_794	NC_010465	+	3469402	3469401	45	mTSS	ATT	YPK_3175	rosB	potassium efflux system protein	1	1	1	1	0	1	22	19	12	10	7	10	0.3	8.95198e-16			0.48	1.22413e-06			0	0.00370116	6.3846e-11
YPK_TSS_795	NC_010465	-	3472572		33	mTSS	TCT	YPK_3176	gsk	inosine kinase	1	1	1	0	1	0	8	8	7	0	3	0									3.2212e-13	0.0102793	4.81361e-07
YPK_TSS_796	NC_010465	-	3489226		332	mTSS	CTG	YPK_3189	ddhC	DegT/DnrJ/EryC1/StrS aminotransferase	0	1	0	1	0	0	8	11	5	10	1	1			0	4.1813e-09			0	4.60774e-10	6.46758e-05
YPK_TSS_797	NC_010465	-	3492133		343	mTSS	CAT	YPK_3192	ddhD	oxidoreductase FAD/NAD(P)-binding domain protein	0	1	0	1	0	0	2	66	1	22	4	1			0.24	6.6698e-48						6.36418e-10		0.0146351
YPK_TSS_798	NC_010465	-	3494152		68	mTSS	TTT	YPK_3194	adk	nucleoside-triphosphate--adenylate kinase	1	0	1	0	0	0	72	5	25	2	5	1	0.32	2.91674e-15			0.5	0.0180258			0		0
YPK_TSS_799	NC_010465	-	3496232		47	mTSS	TTG	YPK_3195	htpG	heat shock protein Hsp90	1	0	0	0	0	0	38	2	4	1	0	0	0.32	2.2671e-10							0		0.000647184
YPK_TSS_800	NC_010465	-	3497375		61	mTSS	TTT	YPK_3197	ybaB	conserved hypothetical protein	1	0	0	0	0	0	13	0	17	3	0	0											0
YPK_TSS_801	NC_010465	-	3497640		326	mTSS	CAT	YPK_3197	ybaB	conserved hypothetical protein	1	0	1	0	0	0	31	8	52	6	1	0	0	2.29291e-24			0	2.76016e-44			2.65348e-07		0
YPK_TSS_802	NC_010465	-	3499406		60	mTSS	AAT	YPK_3198	dnaX	DNA polymerase III, subunits gamma and tau	0	1	0	0	0	0	5	11	0	5	6	2			0	1.17086e-07						0.0114794
YPK_TSS_803	NC_010465	-	3500755		190	mTSS	TTT	YPK_3199	apt-2	adenine phosphoribosyltransferase	1	0	1	0	0	0	19	3	11	1	0	0	0.22	1.20408e-12			0.3	2.85441e-06			3.47677e-08		5.95075e-08
YPK_TSS_804	NC_010465	+	3501985	3501986	107	mTSS	TGA	YPK_3203		conserved hypothetical protein	1	1	1	1	0	0	20	27	25	22	1	1	0.27	1.11557e-08			0.09	6.35193e-13	0.34	0.000154268	0	7.21611e-05	9.78908e-05	0.00320908
YPK_TSS_805	NC_010465	+	3507032		363	mTSS	GAG	YPK_3207	acrA	efflux transporter, RND family, MFP subunit	1	1	1	1	0	0	35	74	17	19	5	5	0	7.16359e-36	0.18	2.15857e-56	0.06	7.20139e-13			4.26316e-14	6.69723e-13	0
YPK_TSS_806	NC_010465	+	3507095		300	mTSS	GAA	YPK_3207	acrA	efflux transporter, RND family, MFP subunit	0	1	0	1	0	0	3	15	8	12	1	1			0	7.33462e-09						0.0128269
YPK_TSS_807	NC_010465	+	3507312	3507314	83	mTSS	GCA	YPK_3207	acrA	efflux transporter, RND family, MFP subunit	1	0	1	0	0	0	26	2	31	2	0	0	0.1	1.24147e-15			0.24	3.72669e-14			3.10397e-09		2.73214e-06
YPK_TSS_808	NC_010465	+	3514254		188	mTSS	GAC	YPK_3213		conserved hypothetical protein	0	0	1	0	0	0	9	6	33	1	1	0					0.09	8.75671e-30			0.00015132		9.61645e-16
YPK_TSS_809	NC_010465	+	3514336		106	mTSS	ATA	YPK_3213		conserved hypothetical protein	1	1	1	0	1	0	33	21	13	8	88	2	0.09	1.00669e-29	0	3.25751e-19	0.11	2.52376e-06			0	0.00892595	0
YPK_TSS_810	NC_010465	-	3517094		80	mTSS	CTA	YPK_3216	ybaY	putative lipoprotein	1	1	1	1	0	0	14	11	28	53	7	4	0	1.90363e-16	0	1.27458e-11	0.03	1.19082e-26	0	1.87652e-54	2.21097e-11	0.00735544	0	1.15878e-06
YPK_TSS_811	NC_010465	+	3517246		25	mTSS	GAA	YPK_3217	tesB	acyl-CoA thioesterase II	1	1	1	1	1	1	78	28	116	46	31	23	0.13	3.55161e-83			0.35	3.73514e-76			0	0.000183304	0	4.53175e-06
YPK_TSS_812	NC_010465	-	3524152		59	mTSS	TCG	YPK_3222	mrtA/mdlA-4	ABC transporter related, putative efflux pump, imporant for colonization of the MLNs	0	1	0	1	1	0	5	19	6	12	10	3			0	0			0	1.38256e-16		0.0225527
YPK_TSS_813	NC_010465	+	3528343		609	mTSS	GAT	YPK_3227	ybaX	ExsB protein	1	0	1	0	0	0	17	4	32	6	1	1	0	4.21693e-20			0.31	9.07527e-25			1.62792e-10		0
YPK_TSS_814	NC_010465	-	3530208		65	mTSS	AGG	YPK_3228	ybaW	thioesterase superfamily protein	0	1	0	1	0	0	3	19	5	40	0	0			0	1.15591e-18			0.24	1.29074e-27		0.00698847		0.00076541
YPK_TSS_815	NC_010465	-	3533183		214	mTSS	CAT	YPK_3230	ppiD	PpiC-type peptidyl-prolyl cis-trans isomerase	1	0	0	0	0	0	12	2	5	0	0	1	0	6.07788e-06							8.22688e-08		2.69145e-07
YPK_TSS_816	NC_010465	-	3533603		61	mTSS	CTG	YPK_3231	hupB	histone family protein DNA-binding protein	1	0	1	0	0	0	150	6	390	2	0	0	0.02	1.17812e-103			0.01	0			0		0
YPK_TSS_817	NC_010465	-	3533671		129	mTSS	CTG	YPK_3231	hupB	histone family protein DNA-binding protein	1	1	1	1	0	0	183	83	240	27	7	0	0.01	2.63624e-142	0	2.22332e-87	0.01	4.74478e-175	0.28	2.29289e-16	0	0	0	0.00348054
YPK_TSS_818	NC_010465	-	3536196		82	mTSS	CCT	YPK_3232	lon	ATP-dependent protease La	1	1	1	1	1	1	154	15	71	16	11	10	0.15	7.74741e-116			0.38	3.3977e-22	0	1.24117e-11	0	0.0327962	0	0.0265127
YPK_TSS_819	NC_010465	-	3536436		322	mTSS	TAC	YPK_3232	lon	ATP-dependent protease La	1	1	1	1	1	1	35	167	42	42	108	17	0.11	3.41906e-12	0.2	1.20221e-83	0.13	2.10101e-16	0	5.66608e-35	0	0	0	0.000329278
YPK_TSS_820	NC_010465	-	3538445		36	mTSS	AAT	YPK_3234	clpP	ATP-dependent Clp protease, proteolytic subunit ClpP	1	1	1	1	1	0	119	49	175	39	20	4	0.29	3.18975e-65			0.46	2.57653e-98			0	3.26229e-13	0	0.001019
YPK_TSS_821	NC_010465	-	3538523		114	mTSS	GGG	YPK_3234	clpP	ATP-dependent Clp protease, proteolytic subunit ClpP	0	0	1	0	0	0	1	1	11	3	0	1											3.47126e-06
YPK_TSS_822	NC_010465	-	3538579		170	mTSS	GAC	YPK_3234	clpP	ATP-dependent Clp protease, proteolytic subunit ClpP	1	0	0	0	0	0	14	0	0	0	1	1									0.0133547
YPK_TSS_823	NC_010465	-	3540360		185	mTSS	TCT	YPK_3235	tig	trigger factor	1	0	1	0	0	0	177	6	80	0	3	0	0.21	4.63699e-90			0.13	1.65139e-51			0	0.0102318	0
YPK_TSS_824	NC_010465	-	3540532		99	mTSS	GAA	YPK_3236		conserved hypothetical protein	1	0	0	0	0	0	11	9	2	1	3	1	0.09	0.000462469							6.23704e-07	0.012115
YPK_TSS_825	NC_010465	-	3540951		39	mTSS	AGT	YPK_3237	bolA	BolA family protein	0	1	0	1	1	0	8	98	6	31	47	9			0.1	3.38117e-87					2.41331e-05	0	1.52001e-09	0.000446011
YPK_TSS_826	NC_010465	-	3540974		62	mTSS	GGG	YPK_3237	bolA	BolA family protein	1	0	1	0	0	0	23	3	28	1	1	0											0.000477511
YPK_TSS_827	NC_010465	+	3541182		79	mTSS	GAC	YPK_3238	yajG	uncharacterized lipoprotein	1	1	1	1	0	0	37	19	42	24	9	1	0.18	4.12948e-26	0	2.41833e-18	0.02	1.84272e-40	0	1.15228e-19	0	0.0243019	0	0.00456673
YPK_TSS_828	NC_010465	+	3543654		65	mTSS	ACT	YPK_3240		conserved hypothetical protein	1	1	1	1	0	0	39	47	45	27	1	1	0.2	6.46062e-33			0.29	1.2712e-28	0	2.83515e-32	0	4.49242e-11	0	0.0011513
YPK_TSS_829	NC_010465	+	3544807		45	mTSS	ACA	YPK_3241	cyoA	ubiquinol oxidase, subunit II	1	1	1	1	0	0	223	114	265	58	6	1	0.22	4.9297e-114			0.23	4.10098e-201	0	9.69679e-56	0	0	0	2.75361e-07
YPK_TSS_830	NC_010465	+	3550103		22	mTSS	AGA	YPK_3246	yajR	major facilitator superfamily MFS_1	1	0	0	0	0	0	14	3	9	2	3	1									1.00579e-06		7.87852e-07
YPK_TSS_831	NC_010465	-	3552130		26	mTSS	ATT	YPK_3247	yajQ	protein of unknown function DUF520	1	0	1	0	0	0	22	1	22	0	1	0	0.13	2.48128e-19			0.11	5.09719e-18			0		0
YPK_TSS_832	NC_010465	+	3552284		52	mTSS	ATA	YPK_3248	panE	2-dehydropantoate 2-reductase	0	1	1	1	1	0	2	7	3	6	6	1			0	0	0.27	0.00471558	0	2.04616e-06
YPK_TSS_833	NC_010465	-	3561653		34	mTSS	CCT	YPK_3257	ribH	6,7-dimethyl-8-ribityllumazine synthase	1	0	0	0	0	0	64	3	24	0	1	0	0.19	8.91542e-35							0		0
YPK_TSS_834	NC_010465	-	3561661		42	mTSS	TCC	YPK_3257	ribH	6,7-dimethyl-8-ribityllumazine synthase	1	0	1	0	0	0	15	2	22	0	1	1									1.37001e-10		0
YPK_TSS_835	NC_010465	-	3563474		29	mTSS	AGT	YPK_3259	ybaD	ATP-cone domain protein	1	1	1	1	1	0	86	40	135	24	24	6					0.5	3.73098e-40	0	1.9857e-25	0	5.91903e-07	0	0.0231715
YPK_TSS_836	NC_010465	-	3568350		61	mTSS	CGG	YPK_3263	yajC	preprotein translocase, YajC subunit	1	0	1	0	0	0	51	3	17	1	0	0	0	3.88272e-27			0	4.65271e-07			0		1.44629e-13
YPK_TSS_837	NC_010465	+	3571644		147	mTSS	ACT	YPK_3267	ahpC	alkyl hydroperoxide reductase/thiol specific antioxidant/ Mal allergen	1	1	1	1	1	0	80	58	50	28	21	1	0.13	4.21796e-31	0.43	1.3726e-07	0.17	2.66721e-17	0	9.892e-21	0	2.46652e-09	0	0.00233863
YPK_TSS_838	NC_010465	+	3571658		133	mTSS	ATC	YPK_3267	ahpC	alkyl hydroperoxide reductase/thiol specific antioxidant/ Mal allergen	0	0	1	0	1	1	54	75	58	17	80	19									0	5.80556e-08	0	0.0245106
YPK_TSS_839	NC_010465	-	3583772		145	mTSS	GAA	YPK_3275	phoR	PAS/PAC sensor signal transduction histidine kinase	1	1	1	1	1	1	10	28	10	14	24	11			0	4.23389e-22	0.48	2.61954e-05	0	3.71528e-11		0.000841062	0.000111761
YPK_TSS_840	NC_010465	-	3584382		41	mTSS	AAA	YPK_3276	phoB	two component transcriptional regulator, winged helix family	1	0	1	0	0	0	19	1	23	0	2	1	0.24	1.22325e-15			0.35	6.79227e-13			5.8912e-08		2.30543e-15
YPK_TSS_841	NC_010465	-	3590804		147	mTSS	ACA	YPK_3279	yajF	fructokinase	1	0	0	0	0	0	10	2	3	8	2	1	0	2.99319e-11							5.13155e-12		7.46581e-05	0.0151475
YPK_TSS_842	NC_010465	-	3592447		30	mTSS	CAT	YPK_3281	yaiE	protein of unknown function DUF1255	0	1	1	0	0	0	6	21	14	1	1	0			0.22	1.53459e-08						2.65051e-05	0
YPK_TSS_843	NC_010465	-	3596019		25	mTSS	TCA	YPK_3285		conserved hypothetical protein	1	1	1	1	1	0	93	49	40	91	28	7	0.06	4.55817e-102			0.25	5.79621e-38			0	0	0	0
YPK_TSS_844	NC_010465	-	3600250		22	mTSS	TCT	YPK_3289	crl	transcriptional regulator Crl	1	1	1	0	0	0	19	11	16	0	1	1	0.37	2.79359e-10	0	6.51788e-07	0.28	2.43663e-06			6.84659e-13	0.00909244	0
YPK_TSS_845	NC_010465	-	3601589		54	mTSS	TCT	YPK_3290	frsA	protein of unknown function DUF1100 hydrolase family protein	1	1	1	0	1	0	40	49	67	6	23	2	0.5	5.37375e-10	0	1.82208e-55					0	5.3979e-09	0
YPK_TSS_846	NC_010465	-	3602180	3602178	60	mTSS	CAA	YPK_3291	gpt	xanthine phosphoribosyltransferase	1	0	1	0	0	0	13	1	30	0	0	0	0.28	0.000105468							9.06676e-06
YPK_TSS_847	NC_010465	+	3607805		94	mTSS	AGT	YPK_3295	pepD	aminoacyl-histidine dipeptidase	1	1	1	0	1	0	55	23	27	5	15	2	0.48	1.18283e-05							0	0.00896014	0
YPK_TSS_848	NC_010465	-	3619456		214	mTSS	GCT	YPK_3305	nqrA	NADH:ubiquinone oxidoreductase, subunit A	1	1	1	1	0	0	86	101	115	72	2	1	0	2.48287e-100	0	2.19703e-118	0.03	1.45024e-134	0	9.26006e-81	0	7.75774e-14	0	1.52937e-08
YPK_TSS_849	NC_010465	+	3619652	3619651	68	mTSS	ATA	YPK_3306	yafK	protein of unknown function DUF949	0	1	0	1	1	0	6	16	2	23	11	1									8.19904e-12	6.96479e-05		0.00361562
YPK_TSS_850	NC_010465	-	3622025		43	mTSS	GAA	YPK_3308	gmhA	phosphoheptose isomerase	1	0	1	0	0	0	49	9	57	8	8	5									0		0
YPK_TSS_851	NC_010465	+	3622178		43	mTSS	ATC	YPK_3309	fadE	acyl-CoA dehydrogenase	0	0	1	1	0	0	5	5	21	39	1	1					0.4	4.02809e-11					0	0.00965224
YPK_TSS_852	NC_010465	+	3642148		30	mTSS	AAC	YPK_3322	ybdL	aminotransferase class I and II	1	0	0	0	0	0	11	1	1	0	0	0									2.42034e-05
YPK_TSS_853	NC_010465	+	3656727		22	mTSS	GAA	YPK_3337	emrR	transcriptional regulator, MarR family	1	0	1	1	0	0	32	3	16	35	1	1	0.19	7.37187e-25			0.07	2.02443e-11			0		0	0.0255805
YPK_TSS_854	NC_010465	-	3661712		22	mTSS	TGC	YPK_3340	yfiF	tRNA/rRNA methyltransferase (SpoU)	1	0	0	0	0	0	12	0	6	0	0	0									3.27362e-06
YPK_TSS_855	NC_010465	+	3663298	3663297	32	mTSS	GCT	YPK_3343	yfiQ, patZ, pka	GCN5-related N-acetyltransferase, acetylation of RNase P, RcsB	0	1	1	1	0	0	3	11	14	20	1	0					0.11	2.74795e-11					6.87889e-08
YPK_TSS_856	NC_010465	+	3666080		68	mTSS	TCT	YPK_3344	pssA	phospholipase D/Transphosphatidylase	1	0	1	0	0	0	3	1	5	0	0	0	0	0.0144101			0.4	0.00562278
YPK_TSS_857	NC_010465	-	3676681		31	mTSS	GTA	YPK_3349	clpB	ATP-dependent chaperone ClpB	1	1	0	1	0	0	17	11	7	26	4	47	0	1.89435e-07	0	1.98733e-06			0.25	1.12292e-06	7.32401e-06		3.6057e-06	0.00570415
YPK_TSS_858	NC_010465	+	3678562	3678563	64	mTSS	GAT	YPK_3352	yfiO	putative lipoprotein	1	1	1	0	1	0	13	25	31	6	19	8			0.34	8.75652e-14					0.000432162		0.000146309
YPK_TSS_859	NC_010465	+	3679678	3679679	34	mTSS	TAT	YPK_3353	yfiA	sigma 54 modulation protein/ribosomal protein S30EA	1	1	1	1	1	1	241	57	650	68	68	43	0.12	0			0.13	0				1.95174e-05		0.000138947
YPK_TSS_860	NC_010465	-	3684416		508	mTSS	TGT	YPK_3357	aroF	phospho-2-dehydro-3-deoxyheptonate aldolase	1	1	1	0	1	1	20	57	12	8	57	19	0.18	3.4699e-21	0.15	2.83272e-55	0.29	7.11224e-11			9.78055e-14	5.71465e-09	0
YPK_TSS_861	NC_010465	+	3686914		36	mTSS	GCA	YPK_3360	ydiY	protein of unknown function DUF481	1	0	0	0	0	0	18	1	3	0	0	0	0.27	6.39652e-11							0
YPK_TSS_862	NC_010465	-	3690075		70	mTSS	CTT	YPK_3364	rpsP	ribosomal protein S16	1	1	1	0	0	0	1163	40	360	4	5	0	0.05	0	0	9.14208e-34	0.12	0			0	2.12765e-05	0
YPK_TSS_863	NC_010465	-	3690186		181	mTSS	TTC	YPK_3364	rpsP	ribosomal protein S16	1	1	0	0	1	0	51	23	9	1	25	4			0.28	1.5224e-08					0	0.000551629	3.30268e-07
YPK_TSS_864	NC_010465	+	3691728		32	mTSS	CTA	YPK_3366	ypjD	cytochrome c assembly protein	1	1	0	0	1	0	22	16	9	3	17	4									5.99451e-10	0.00834767	1.28934e-07
YPK_TSS_865	NC_010465	-	3691806		212	mTSS	AGC	YPK_3365	ffh	signal recognition particle protein	0	1	1	0	0	0	4	10	11	6	5	4					0.33	0.000269574				0.0131978	1.33959e-09
YPK_TSS_866	NC_010465	-	3694611	3694612	104	mTSS	ATG	YPK_3368	luxS	quorum-sensing autoinducer 2 (AI-2), LuxS	0	1	1	0	1	1	1	25	12	3	31	11			0.19	2.7056e-07	0.33	0.000442763				2.86002e-06	5.78013e-13
YPK_TSS_867	NC_010465	-	3698837		44	mTSS	AAA	YPK_3372	csrA	carbon storage regulator, CsrA	1	1	1	1	1	1	107	51	112	23	89	17	0.29	4.2059e-46	0	1.28383e-30	0.18	2.34666e-61	0.2	6.34508e-08	0	4.80721e-05	0	0.00726164
YPK_TSS_868	NC_010465	-	3698920		127	mTSS	GTT	YPK_3372	csrA	carbon storage regulator, CsrA	0	1	0	1	1	1	5	67	3	34	57	36			0.21	4.04543e-24			0.22	4.68689e-19		0	0.000124519	0.00265916
YPK_TSS_869	NC_010465	-	3701762	3701761	92	mTSS	ACT	YPK_3373	alaS	alanyl-tRNA synthetase	1	1	1	0	0	0	162	29	12	3	9	2	0.37	4.57375e-96	0.32	3.29194e-20	0.31	0.0190265					7.98378e-12
YPK_TSS_870	NC_010465	-	3703900		71	mTSS	ATT	YPK_3375	recA	RecA protein	1	0	0	0	0	0	10	3	6	0	1	1									1.32208e-09		4.78292e-08
YPK_TSS_871	NC_010465	+	3706312		25	mTSS	ATG	YPK_3378		transcriptional regulator, DeoR family	1	0	1	0	0	0	41	3	31	1	1	0	0.12	3.74872e-41			0.21	2.49296e-25			0		0
YPK_TSS_872	NC_010465	+	3717277		26	mTSS	GCC	YPK_3388	katY	catalase/peroxidase HPI	1	1	1	1	0	0	20	87	795	99	5	5	0.08	7.78975e-19	0.07	1.77457e-83	0.05	0	0.32	3.7258e-47	0	0	0	0
YPK_TSS_873	NC_010465	+	3727587		89	mTSS	TTT	YPK_3397	fucR	transcriptional regulator, DeoR family	0	1	0	1	0	0	0	20	2	39	0	0										0.0193556	0.000550932	0.0020731
YPK_TSS_874	NC_010465	+	3736087	3736088	203	mTSS	TCA	YPK_3404	fumA	hydro-lyase, Fe-S type, tartrate/fumarate subfamily, beta subunit	1	1	1	1	0	0	20	35	45	12	8	2	0.21	8.21889e-11	0.18	4.87455e-22	0.29	7.54656e-15	0	5.69157e-06
YPK_TSS_875	NC_010465	-	3754663		111	mTSS	GTA	YPK_3421	ydjJ	alcohol dehydrogenase zinc-binding domain protein	0	0	0	1	0	0	0	3	1	25	0	0												0.0363055
YPK_TSS_876	NC_010465	+	3754878		157	mTSS	CAA	YPK_3422	rpiB-1	sugar-phosphate isomerase, RpiB/LacA/LacB family	0	0	0	1	0	0	2	0	2	52	0	1							0.24	1.10031e-20				4.6619e-06
YPK_TSS_877	NC_010465	+	3755005		30	mTSS	ATT	YPK_3422	rpiB-1	sugar-phosphate isomerase, RpiB/LacA/LacB family	0	0	0	1	0	0	0	3	1	32	0	0												0.00318347
YPK_TSS_878	NC_010465	-	3760780		543	mTSS	CGG	YPK_3425	rpoS	RNA polymerase, sigma 70 subunit, RpoD family	1	1	1	1	1	1	30	488	114	139	282	144	0.3	3.29857e-14	0.21	0	0.08	1.24287e-76	0.39	1.54049e-70	0	0	0	1.03436e-11
YPK_TSS_879	NC_010465	-	3765439		268	mTSS	TGG	YPK_3431	ispD	2-C-methyl-D-erythritol 4-phosphate cytidylyltransferase	1	1	1	1	1	1	13	93	29	95	41	51	0.18	3.31506e-05	0.15	1.53005e-73	0.12	2.65743e-21	0.28	5.29726e-37	0	9.15352e-16	0	1.67177e-13
YPK_TSS_880	NC_010465	-	3765513		18	mTSS	TTT	YPK_3432	ftsB	septum formation initiator	1	0	1	0	0	0	18	9	10	0	3	1	0.08	2.67557e-13			0.36	0.000199634			2.26256e-11	0.0178365	1.93014e-07
YPK_TSS_881	NC_010465	-	3765594		99	mTSS	AAA	YPK_3432	ftsB	septum formation initiator	1	0	0	1	0	0	12	7	3	13	3	2	0.2	2.97148e-06					0	3.87292e-08	4.48857e-08		1.37056e-05
YPK_TSS_882	NC_010465	-	3766321		194	mTSS	TAA	YPK_3433	ygbE	conserved hypothetical protein	1	1	1	0	1	0	18	19	25	6	25	3	0	6.90577e-22	0	4.77481e-20	0.2	3.18307e-24			7.10389e-07	0.0433058	2.17102e-07
YPK_TSS_883	NC_010465	-	3770855		28	mTSS	CGC	YPK_3437	cysG-2	uroporphyrin-III C-methyltransferase	0	0	1	0	1	0	6	3	44	1	82	4					0.11	1.64618e-45					0
YPK_TSS_884	NC_010465	+	3771417	3771416	23	mTSS	AAG	YPK_3438		YcfA family protein	1	1	1	1	1	1	35	152	40	12	12	21					0.5	2.36844e-06	0	0.000558008	0	0	0	0
YPK_TSS_885	NC_010465	-	3773837		637	mTSS	TGG	YPK_3440	cysH	phosphoadenosine phosphosulfate reductase	0	1	1	1	0	0	6	16	31	16	7	5			0	5.19646e-17	0.09	9.03682e-23	0	1.15425e-15		0.0103352	0	0.0154138
YPK_TSS_886	NC_010465	-	3776810		81	mTSS	TTT	YPK_3442	cysJ	sulfite reductase (NADPH) flavoprotein, alpha chain	0	0	1	0	1	0	1	0	8	0	5	1											2.4447e-07
YPK_TSS_887	NC_010465	+	3777095		27	mTSS	GAT	YPK_3443	ygcM	queuosine biosynthesis protein QueD	1	0	1	0	0	0	47	3	19	2	1	0	0.22	5.7011e-40			0.43	1.64568e-07			0		0
YPK_TSS_888	NC_010465	-	3778414		28	mTSS	CTG	YPK_3444	ygcF	radical SAM domain protein	1	0	0	0	0	0	12	9	9	2	2	0	0.14	1.979e-05							3.87544e-06	0.00678502	0.000117188
YPK_TSS_889	NC_010465	-	3779158		63	mTSS	TCA	YPK_3445	sodC	superoxide dismutase	1	1	1	1	0	0	117	35	458	30	4	1	0.01	3.81181e-123	0	1.58238e-38	0.03	0	0.15	4.05844e-21	0	0.0003957	0	7.72125e-07
YPK_TSS_890	NC_010465	-	3781252		490	mTSS	TCC	YPK_3446	eno	phosphopyruvate hydratase	0	1	0	1	1	1	34	249	9	32	176	14			0.25	1.97516e-227			0.28	8.8475e-24	0	0	1.03432e-08	0.000618824
YPK_TSS_891	NC_010465	-	3782526		46	mTSS	TCC	YPK_3447	pyrG	CTP synthase	1	0	1	0	0	0	137	30	80	3	15	2	0.13	5.64647e-100			0.23	1.06553e-46			0	2.90062e-06	0
YPK_TSS_892	NC_010465	+	3792830		47	mTSS	GTG	YPK_3454	mtn	adenosylhomocysteine nucleosidase	1	0	1	0	0	0	19	9	24	1	2	2	0.38	1.10963e-15							6.78405e-09		0
YPK_TSS_893	NC_010465	-	3795704		24	mTSS	AAC	YPK_3457	yadR	iron-sulfur cluster assembly accessory protein	1	0	0	0	0	0	16	16	13	10	7	4	0.13	9.78465e-09							1.713e-07	0.000698901	0
YPK_TSS_894	NC_010465	-	3795759		79	mTSS	TAG	YPK_3457	yadR	iron-sulfur cluster assembly accessory protein	1	1	1	1	1	0	40	29	39	45	15	4									0	3.10147e-05	0	0.00189992
YPK_TSS_895	NC_010465	-	3797276		24	mTSS	CTC	YPK_3458	yadQ	chloride channel core	0	0	1	1	0	0	6	9	11	29	1	3					0	6.86117e-11			0.000901334		0
YPK_TSS_896	NC_010465	-	3797299		47	mTSS	CAT	YPK_3458	yadQ	chloride channel core	0	1	0	0	0	0	1	15	1	5	2	0			0	1.88598e-08						0.0322957
YPK_TSS_897	NC_010465	+	3810220		57	mTSS	CTG	YPK_3468	dksA	transcriptional regulator, TraR/DksA family	1	0	1	0	0	0	175	6	159	1	2	1	0.36	5.41759e-72			0.19	4.1732e-65			0		0
YPK_TSS_898	NC_010465	+	3812014		82	mTSS	GCT	YPK_3470	pcnB	poly(A) polymerase	1	0	1	0	0	0	22	2	11	0	1	0	0	9.54128e-23			0	4.61846e-08			3.4609e-14		3.86655e-12
YPK_TSS_899	NC_010465	+	3816337		140	mTSS	GCA	YPK_3474	panD	aspartate 1-decarboxylase	1	1	1	1	0	0	24	42	20	23	6	5	0.16	1.47559e-21	0	4.54982e-47	0.06	1.63262e-12	0	4.6e-24	8.68657e-15	1.32946e-08	0	0.000699591
YPK_TSS_900	NC_010465	-	3820403		189	mTSS	GCA	YPK_3477	yadG	ABC transporter related	1	0	0	0	0	0	10	3	8	1	4	1	0	6.12935e-12							3.53838e-05		5.54601e-09
YPK_TSS_901	NC_010465	-	3822053		71	mTSS	TCA	YPK_3479	hpt	hypoxanthine phosphoribosyltransferase	1	1	1	0	1	0	26	16	12	2	18	3			0	8.52395e-14	0.34	0.0238501			0	0.0153646	0
YPK_TSS_902	NC_010465	-	3822107		125	mTSS	CCC	YPK_3479	hpt	hypoxanthine phosphoribosyltransferase	1	1	1	0	0	0	31	17	27	4	6	3	0.36	7.06754e-12	0	3.51699e-15	0.16	5.70593e-18			0	0.0156991	0
YPK_TSS_903	NC_010465	+	3824087		24	mTSS	ACA	YPK_3481	yacC	conserved hypothetical protein	1	1	1	1	1	0	52	18	16	13	40	5	0.27	1.59347e-37			0.29	9.48703e-08	0	2.50127e-13	0	0.000441574	0	0.0215801
YPK_TSS_904	NC_010465	+	3824531		44	mTSS	CCC	YPK_3482	speE	spermidine synthase	1	0	1	0	0	0	25	4	13	0	1	1	0.23	7.07695e-15			0.24	1.50529e-06			0		0
YPK_TSS_905	NC_010465	-	3828155		23	mTSS	AAG	YPK_3486	yacL	conserved hypothetical protein	0	1	1	1	0	0	2	11	4	5	2	0			0	4.33194e-06			0	0.00651525		0.0102863
YPK_TSS_906	NC_010465	-	3828217		85	mTSS	ATA	YPK_3486	yacL	conserved hypothetical protein	1	1	1	1	1	0	22	38	24	21	15	1	0.34	8.71303e-14	0	2.12472e-31	0.46	7.01011e-08	0	6.78822e-18	1.24843e-11	2.72303e-05	0	0.0220611
YPK_TSS_907	NC_010465	-	3831275		228	mTSS	CGA	YPK_3487	acnB	aconitate hydratase 2	1	1	1	1	1	0	127	119	309	101	31	7	0.15	4.44637e-112	0.1	2.12103e-109	0.18	0	0.08	3.6627e-98	0	0	0	2.37619e-10
YPK_TSS_908	NC_010465	-	3831432		385	mTSS	CCG	YPK_3487	acnB	aconitate hydratase 2	0	1	1	1	1	0	1	12	13	12	4	1			0	3.11506e-08	0	4.9653e-07	0	2.60679e-08		0.0139072	0
YPK_TSS_909	NC_010465	-	3833848		106	mTSS	AGT	YPK_3489	lpdA	dihydrolipoamide dehydrogenase	1	1	1	0	0	0	119	36	351	5	5	0	0.3	2.82603e-54	0.32	2.90548e-08	0.48	0.00857215			0	1.32284e-12	0
YPK_TSS_910	NC_010465	-	3839349		78	mTSS	CGT	YPK_3492	pdhR	GntR domain protein	1	1	1	0	0	0	101	13	18	7	6	1	0.23	2.59194e-75	0	3.86412e-13	0.39	0.000780133			0	0.00676405	0
YPK_TSS_911	NC_010465	+	3843709		31	mTSS	ACG	YPK_3497	nadC	nicotinate-nucleotide pyrophosphorylase	1	1	1	0	0	0	28	15	17	7	4	1	0.07	1.16199e-28	0	2.2764e-16	0.28	2.44709e-10			0	0.01017	0
YPK_TSS_912	NC_010465	-	3849631		70	mTSS	CTG	YPK_3501	guaC	guanosine monophosphate reductase	1	1	1	0	1	0	14	31	41	7	11	2	0	3.03382e-10	0	1.7618e-33	0.13	4.88665e-28			5.00462e-05	0.000260324	0
YPK_TSS_913	NC_010465	+	3849649		-2	rmTSS	GAA	YPK_3502		conserved hypothetical protein	0	0	1	0	0	0	5	4	15	5	0	0					0.2	3.61597e-11					5.79613e-09
YPK_TSS_914	NC_010465	+	3849829		28	mTSS	ATC	YPK_3503	coaE	dephospho-CoA kinase	1	1	1	1	0	0	30	13	37	21	4	4	0.34	2.67294e-13			0.24	3.84439e-31	0	1.295e-21	0	0.00805606	0	0.00182824
YPK_TSS_915	NC_010465	-	3859561		70	mTSS	TTC	YPK_3513	ftsZ	cell division protein FtsZ	1	0	1	0	0	0	30	11	60	0	3	2	0.2	3.26921e-05			0.35	5.89156e-07			0	0.00195061	0
YPK_TSS_916	NC_010465	-	3865320		48	mTSS	TTT	YPK_3518	murG	UDP-N-acetylglucosamine--N-acetylmuramyl-(pentapeptide) pyrophosphoryl-undecaprenol N-acetylglucosamine transferase	1	0	0	0	0	0	12	1	9	3	1	1	0.1	1.69629e-09							1.93051e-10		1.09591e-07
YPK_TSS_917	NC_010465	-	3875333		54	mTSS	TGG	YPK_3527	mraZ	MraZ protein	1	1	1	0	0	0	32	12	21	7	1	2	0.42	1.68278e-16	0.41	0.00424808	0.46	3.0579e-11			0	0.0101199	0
YPK_TSS_918	NC_010465	+	3876257		124	mTSS	CAA	YPK_3528	ygaW	protein of unknown function DUF1144	0	1	0	0	0	0	0	15	2	8	1	0			0	2.57342e-07						0.016194
YPK_TSS_919	NC_010465	-	3878087		125	mTSS	CAA	YPK_3529	fruR	transcriptional regulator, LacI family	0	1	0	0	0	0	5	10	5	5	2	0			0	1.58535e-07					0.000363382		5.43135e-05
YPK_TSS_920	NC_010465	-	3878276		314	mTSS	GAT	YPK_3529	fruR	transcriptional regulator, LacI family	1	1	1	1	0	0	40	28	39	25	3	3	0	1.28931e-43			0.1	3.30744e-35			0	0.000521711	0	0.000112623
YPK_TSS_921	NC_010465	-	3905716		29	mTSS	TCT	YPK_3549		conserved hypothetical protein	0	0	0	0	1	0	0	4	8	5	190	4											1.19289e-07
YPK_TSS_922	NC_010465	-	3929512		215	mTSS	AGA	YPK_3566		ImpA domain protein	0	0	0	0	1	0	0	0	0	0	5	0
YPK_TSS_923	NC_010465	+	3929615		39	mTSS	GAT	YPK_3567		conserved hypothetical protein	0	0	0	0	1	0	0	5	0	0	66	0
YPK_TSS_924	NC_010465	+	3938657	3938656	436	mTSS	ATC	YPK_3574	apaG	ApaG domain protein	0	1	0	1	1	1	4	17	3	25	44	17			0	1.46924e-10			0	0		2.81897e-06		0.00397837
YPK_TSS_925	NC_010465	-	3949255		32	mTSS	TAA	YPK_3583	carA	carbamoyl-phosphate synthase, small subunit	1	0	1	0	0	0	10	0	11	0	0	0	0.28	0.000896993							2.17479e-06		1.82173e-09
YPK_TSS_926	NC_010465	-	3949327		104	mTSS	ATT	YPK_3583	carA	carbamoyl-phosphate synthase, small subunit	1	0	1	0	0	0	42	5	51	3	0	0					0.43	4.73654e-23			0		0
YPK_TSS_927	NC_010465	-	3956135		177	mTSS	TCT	YPK_3588	ileS	isoleucyl-tRNA synthetase	1	0	1	0	0	0	14	3	19	3	2	0	0.29	8.27299e-06			0.39	0.00608121			1.4399e-10		0
YPK_TSS_928	NC_010465	-	3956951		23	mTSS	TTC	YPK_3589	ribF	riboflavin biosynthesis protein RibF	0	1	0	0	0	0	8	17	7	2	8	1									7.48186e-07		2.52647e-06
YPK_TSS_929	NC_010465	+	3957082		261	mTSS	GCC	YPK_3590	rpsT	ribosomal protein S20	1	1	1	0	0	0	164	22	13	5	1	0	0.02	1.26142e-102	0	5.04472e-14	0	3.22263e-07			0	0.00261018	0
YPK_TSS_930	NC_010465	+	3957212	3957210	131	mTSS	ATC	YPK_3590	rpsT	ribosomal protein S20	1	1	1	1	1	0	320	17	77	11	22	5	0.24	3.51771e-103	0	6.10886e-06	0.12	1.32997e-27	0	7.86288e-07	0	1.64682e-06	0	0.0339111
YPK_TSS_931	NC_010465	+	3957265		78	mTSS	ATT	YPK_3590	rpsT	ribosomal protein S20	1	0	1	0	0	0	149	10	118	3	27	6									0	0.0413285	0
YPK_TSS_932	NC_010465	-	3963393		39	mTSS	ACT	YPK_3594	dnaK	chaperone protein DnaK	1	0	0	1	0	0	68	4	9	21	1	4									0		7.79533e-11
YPK_TSS_933	NC_010465	-	3963515		161	mTSS	ACC	YPK_3594	dnaK	chaperone protein DnaK	1	0	0	1	0	0	63	2	9	30	4	8	0.27	2.03306e-25					0.31	3.60476e-17	0		2.6124e-08	0.00116576
YPK_TSS_934	NC_010465	+	3963628		100	mTSS	GCG	YPK_3595	yaaH	GPR1/FUN34/yaaH family protein	1	0	0	0	0	0	40	1	2	0	0	0	0	5.58188e-37							0
YPK_TSS_935	NC_010465	-	3969289		31	mTSS	GAT	YPK_3598	mogA	molybdenum cofactor synthesis domain protein	1	1	1	1	0	0	51	24	145	42	0	1									0	1.34686e-06	0	3.90064e-06
YPK_TSS_936	NC_010465	-	3970528		29	mTSS	TCA	YPK_3599	talB	transaldolase	1	1	1	1	1	1	82	28	157	22	68	15									0	0.000831076	0	0.020548
YPK_TSS_937	NC_010465	-	3970606		107	mTSS	AGG	YPK_3599	talB	transaldolase	1	1	1	0	1	0	52	18	27	6	19	6	0.44	2.68128e-16	0	4.70464e-11	0.46	0.000649043			0	0.0115835	0
YPK_TSS_938	NC_010465	-	3977526		218	mTSS	ACA	YPK_3604	thrA	aspartate kinase	1	1	1	1	1	0	164	78	64	14	26	7	0.09	5.99747e-176	0.17	1.90844e-66	0.06	4.46163e-67	0	4.3247e-14	0	3.21441e-13	0
YPK_TSS_939	NC_010465	+	3978115	3978114	296	mTSS	GAT	YPK_3606	arcA	two component transcriptional regulator, winged helix family	1	1	0	1	0	0	12	12	9	25	5	3	0	1.89403e-08	0	9.18607e-08			0.34	1.44776e-12	9.56327e-05	0.000743903	3.1858e-06	0.00072263
YPK_TSS_940	NC_010465	+	3978201		210	mTSS	CGC	YPK_3606	arcA	two component transcriptional regulator, winged helix family	1	0	1	0	0	0	21	1	13	0	2	0									3.88505e-10		2.0215e-10
YPK_TSS_941	NC_010465	-	3982575		30	mTSS	CTA	YPK_3612	trpR	Trp operon repressor	1	0	0	0	0	0	11	4	3	2	1	0	0	1.65118e-11							2.93893e-10		1.51988e-05
YPK_TSS_942	NC_010465	-	3984848		147	mTSS	GTA	YPK_3613	slt	lytic transglycosylase catalytic	0	0	1	0	0	0	4	1	10	0	0	0											9.93449e-12
YPK_TSS_943	NC_010465	+	3988308		64	mTSS	GTA	YPK_3615		conserved hypothetical protein	1	1	0	1	0	0	25	57	9	16	6	2	0	9.11935e-32	0.34	3.5729e-56			0	5.7218e-17	0	0.000207789	1.0184e-12	0.0214103
YPK_TSS_944	NC_010465	+	3990963		34	mTSS	CTA	YPK_3618	yjjK	ABC transporter related	1	1	1	0	0	0	32	11	13	1	3	1			0	3.82326e-07	0.33	0.000697768			0	0.00976134	3.76887e-11
YPK_TSS_945	NC_010465	-	3995390		22	mTSS	TAC	YPK_3620	nadR	transcriptional regulator, XRE family	1	0	0	0	0	0	10	0	4	4	0	0	0.49	4.38678e-06							5.20191e-06
YPK_TSS_946	NC_010465	-	4003883		346	mTSS	TTG	YPK_3627	deoC-3	deoxyribose-phosphate aldolase	1	0	1	0	0	0	47	0	15	0	0	0	0.14	5.58389e-41			0.11	1.70244e-11			0		0
YPK_TSS_947	NC_010465	-	4004027		490	mTSS	AAT	YPK_3627	deoC-3	deoxyribose-phosphate aldolase	0	1	0	0	0	0	0	12	0	3	2	1			0	2.59241e-11						0.0111957
YPK_TSS_948	NC_010465	-	4009238		156	mTSS	TAC	YPK_3632	osmY	hyperosmotically inducible periplasmic protein	0	1	0	0	1	0	3	28	3	0	17	3										2.24871e-05	8.01387e-07
YPK_TSS_949	NC_010465	-	4011086		87	mTSS	ATA	YPK_3633	prfC	peptide chain release factor 3	1	0	0	0	0	0	22	0	9	5	1	0									2.54693e-11		4.48828e-09
YPK_TSS_950	NC_010465	-	4012033		31	mTSS	AAA	YPK_3635	holD	DNA polymerase III psi subunit	1	0	0	0	0	0	10	2	4	1	2	1											7.77263e-06
YPK_TSS_951	NC_010465	+	4014492		140	mTSS	ATC	YPK_3638	hmsT	diguanylate cyclase	0	1	0	0	0	0	0	12	0	12	1	2			0	7.14495e-11								0.0153046
YPK_TSS_952	NC_010465	-	4017524		112	mTSS	CGT	YPK_3639	ybhC	pectinesterase	0	0	0	1	0	0	1	9	6	11	0	0							0	5.96908e-11		0.0120018	6.47674e-09	0.0299406
YPK_TSS_953	NC_010465	-	4026659	4026658	15	mTSS	CTC	YPK_3647	waaQ, rfaQ	lipopolysaccharide heptosyltransferase III	1	0	1	0	0	0	13	1	32	0	2	0	0.24	1.11999e-06							5.1788e-07		1.05675e-10
YPK_TSS_954	NC_010465	-	4029864		146	mTSS	TTC	YPK_3649	ydeW	transcriptional regulator, DeoR family	0	1	0	0	0	0	2	15	21	8	9	5										0.01792	0	0.0310237
YPK_TSS_955	NC_010465	-	4029896		178	mTSS	CTG	YPK_3649	ydeW	transcriptional regulator, DeoR family	0	0	1	0	0	0	2	5	15	0	0	0					0.09	1.84853e-06					0
YPK_TSS_956	NC_010465	+	4036334		45	mTSS	CTC	YPK_3656		conserved hypothetical protein	0	0	1	0	0	0	6	6	18	0	3	0					0.49	1.82008e-05			8.97341e-05		0
YPK_TSS_957	NC_010465	-	4043331		57	mTSS	ATG	YPK_3662		conserved hypothetical protein	1	1	1	1	0	0	38	69	63	33	2	2	0.2	1.21784e-31			0.28	2.28669e-34			0	2.95632e-15	0	0.000339256
YPK_TSS_958	NC_010465	+	4063637		223	mTSS	AAT	YPK_3679	pepA	leucyl aminopeptidase	1	1	1	1	1	0	25	33	10	29	13	3			0	2.63857e-26					5.0037e-14	0.000122474	8.7297e-12	0.0359444
YPK_TSS_959	NC_010465	+	4063689		171	mTSS	ACA	YPK_3679	pepA	leucyl aminopeptidase	1	1	1	1	0	0	17	17	11	13	3	0					0.09	6.45096e-05				0.00185045	8.7297e-12	0.0359444
YPK_TSS_960	NC_010465	+	4068993	4068991	31	mTSS	GAC	YPK_3682	yjgM	GCN5-related N-acetyltransferase	0	1	1	1	1	0	10	10	21	13	17	3			0	5.15123e-08	0.09	2.04311e-14	0	1.8214e-16		0.0139574	5.88189e-08
YPK_TSS_961	NC_010465	-	4070498	4070496	32	mTSS	AAT	YPK_3683		protein of unknown function DUF1260	1	1	1	1	1	0	15	10	25	12	22	6	0	2.8085e-08	0	5.90387e-08	0	1.28198e-13	0	2.33476e-12	0.000100853		0
YPK_TSS_962	NC_010465	+	4072937		107	mTSS	GGT	YPK_3686	ddpA-2	extracellular solute-binding protein family 5	0	1	0	1	0	0	6	21	5	60	1	1			0	1.56446e-19			0.37	4.33361e-27	8.10485e-06	0.00115839		1.93388e-06
YPK_TSS_963	NC_010465	+	4074601		107	mTSS	GTC	YPK_3687	ddpB-2	binding-protein-dependent transport systems inner membrane component	0	1	0	0	0	0	2	71	0	5	8	2			0	2.31538e-63						9.12658e-16
YPK_TSS_964	NC_010465	+	4074665	4074666	43	mTSS	TGT	YPK_3687	ddpB-2	binding-protein-dependent transport systems inner membrane component	1	1	1	1	1	0	31	62	21	10	46	2	0.13	1.10272e-28			0.26	3.06252e-11	0	3.63103e-09
YPK_TSS_965	NC_010465	-	4102334		-18	rmTSS	CTT	YPK_3714		sterol-binding domain protein	0	0	1	1	0	0	8	11	19	13	4	1					0.18	1.17106e-08	0	5.85779e-09	1.07494e-06		0
YPK_TSS_966	NC_010465	+	4110561		257	mTSS	GTA	YPK_3720		luciferase family protein	0	0	1	0	0	0	7	7	15	2	2	0					0.11	2.38324e-17					8.63253e-08
YPK_TSS_967	NC_010465	-	4115907		846	mTSS	GGC	YPK_3724	deaD	DEAD/DEAH box helicase domain protein	1	1	1	1	1	1	48	137	30	30	15	7	0	2.89268e-31	0	4.48803e-128	0.02	2.37505e-16	0	1.94535e-27	0	0	0	0.00171551
YPK_TSS_968	NC_010465	-	4118464		90	mTSS	TAG	YPK_3726	pnp	polyribonucleotide nucleotidyltransferase	1	1	1	1	1	1	247	95	128	78	49	49			0.2	2.56534e-68	0.48	1.20707e-35	0.48	1.12146e-42	0	1.20938e-10	0	8.45555e-06
YPK_TSS_969	NC_010465	-	4118978		71	mTSS	CTT	YPK_3727	rpsO	ribosomal protein S15	1	1	1	1	1	1	710	182	308	157	53	18	0.03	0			0.05	0	0.14	7.90955e-132	0	0	0	1.34097e-12
YPK_TSS_970	NC_010465	-	4126094	4126092;4126095	84	mTSS	CGC	YPK_3733	secG	preprotein translocase, SecG subunit	1	0	1	0	0	0	68	10	59	4	4	2	0.1	6.17767e-14			0.08	3.447e-21			0		0
YPK_TSS_971	NC_010465	-	4128488		72	mTSS	GGC	YPK_3735	folP	dihydropteroate synthase	0	1	0	0	0	0	5	20	6	8	7	2			0	1.12874e-17					1.83309e-06	0.0100636	5.7252e-10
YPK_TSS_972	NC_010465	-	4130514		35	mTSS	TTT	YPK_3736	hflB	ATP-dependent metalloprotease FtsH	1	1	1	0	0	0	46	20	61	5	7	1	0.32	9.3438e-24	0.25	6.2009e-09					0	1.79057e-05	0
YPK_TSS_973	NC_010465	+	4131272		31	mTSS	GTT	YPK_3738	yhbY	RNA-binding protein	1	1	1	0	0	0	98	12	27	0	7	0	0.29	1.95641e-38			0.37	1.29732e-08			0	0.0190613	0
YPK_TSS_974	NC_010465	-	4132358		158	mTSS	CAA	YPK_3739	greA	transcription elongation factor GreA	1	0	0	0	0	0	14	1	1	0	0	0	0	3.9208e-06							8.65309e-08
YPK_TSS_975	NC_010465	+	4137398		26	mTSS	ATC	YPK_3744		conserved hypothetical protein	0	0	1	0	0	0	6	7	14	9	1	0					0.4	4.18241e-12			4.50763e-05	0.00543644	3.08977e-09
YPK_TSS_976	NC_010465	-	4139196		25	mTSS	CCG	YPK_3746	xtmA2	putative phage terminase, small subunit	1	1	1	1	1	1	19	33	25	34	72	14	0.2	9.43274e-14	0	1.56475e-38	0.13	8.21472e-21	0.16	1.58177e-25	3.03924e-14	2.32054e-05	0	3.95756e-05
YPK_TSS_977	NC_010465	-	4143050		89	mTSS	GCG	YPK_3753		hypothetical protein YPK_3753	0	0	1	0	0	0	5	4	22	2	0	0					0	1.45813e-14					0
YPK_TSS_978	NC_010465	-	4146176	4146175	68	mTSS	CCT	YPK_3757	rplU	ribosomal protein L21	1	0	1	0	0	0	21	2	47	0	1	0					0.42	3.95039e-09			0.00339025
YPK_TSS_979	NC_010465	+	4146295		73	mTSS	CTC	YPK_3758	ispB	polyprenyl synthetase	1	0	0	0	0	0	13	4	7	4	3	1									3.01145e-08		3.03857e-05
YPK_TSS_980	NC_010465	+	4146327		41	mTSS	AAT	YPK_3758	ispB	polyprenyl synthetase	0	0	1	0	0	0	25	10	24	8	5	1					0.36	1.94154e-07			0		0
YPK_TSS_981	NC_010465	-	4149662		48	mTSS	AGA	YPK_3761	mdh	malate dehydrogenase, NAD-dependent	0	1	0	0	0	0	2	11	1	0	0	0			0	1.01686e-06						0.00969834
YPK_TSS_982	NC_010465	-	4149836		222	mTSS	GTT	YPK_3761	mdh	malate dehydrogenase, NAD-dependent	1	0	0	0	0	0	28	1	23	1	1	0	0.06	1.60699e-21							0		0
YPK_TSS_983	NC_010465	+	4150047	4150048	31	mTSS	TAT	YPK_3762	argR	arginine repressor, ArgR	1	0	0	1	0	0	15	7	5	14	2	1	0.39	4.44328e-08								0.00464551		0.0112127
YPK_TSS_984	NC_010465	+	4150881		56	mTSS	AGT	YPK_3763	yhcN	protein of unknown function DUF1471	0	0	0	0	1	1	1	0	6	0	15	13											3.47479e-09
YPK_TSS_985	NC_010465	+	4154232	4154230	33	mTSS	ACT	YPK_3767	ppa	inorganic diphosphatase	1	1	1	0	0	0	62	20	112	5	8	3	0.17	1.49405e-25	0	4.0261e-16	0.25	4.68891e-56			0	0.0106721	0
YPK_TSS_986	NC_010465	-	4163802	4163799;4163800	83	mTSS	GAG	YPK_3773		protein of unknown function DUF1107	0	1	1	1	1	1	4	24	65	811	152	756			0	0.00010877	0.41	3.6939e-08	0.47	0			0.00482676
YPK_TSS_987	NC_010465	-	4163857		138	mTSS	CAG	YPK_3773		protein of unknown function DUF1107	0	1	1	0	0	0	2	10	13	16	3	1			0	0.0026526	0.07	0.000628971					6.1398e-06
YPK_TSS_988	NC_010465	-	4165564		203	mTSS	ATG	YPK_3775	cysQ	3'(2'),5'-bisphosphate nucleotidase	1	1	1	1	0	0	17	41	13	33	4	1	0.06	2.22625e-18	0.1	1.2568e-32	0.11	2.11043e-12	0	8.90882e-30	0	7.76754e-11	0	0.00581156
YPK_TSS_989	NC_010465	-	4166066		705	mTSS	CGG	YPK_3775	cysQ	3'(2'),5'-bisphosphate nucleotidase	0	0	0	0	1	0	1	0	2	0	5	0
YPK_TSS_990	NC_010465	-	4169309		31	mTSS	TCA	YPK_3778	fklB	peptidylprolyl isomerase FKBP-type	1	1	1	0	0	0	52	10	47	1	1	0									0		0
YPK_TSS_991	NC_010465	+	4169399		197	mTSS	AGC	YPK_3779	ytfB	opacity-associated protein A	1	0	0	0	0	0	3	2	0	2	1	1
YPK_TSS_992	NC_010465	+	4169475		121	mTSS	CAA	YPK_3779	ytfB	opacity-associated protein A	0	0	0	0	1	0	0	2	0	0	13	0
YPK_TSS_993	NC_010465	-	4172534		95	mTSS	TCA	YPK_3784	rpsF	ribosomal protein S6	1	0	1	0	0	0	894	6	175	0	0	0	0.08	0			0.08	1.22684e-126			0		0
YPK_TSS_994	NC_010465	-	4172797		66	mTSS	TCT	YPK_3785		conserved hypothetical protein	0	0	1	0	0	0	5	3	17	3	1	2					0.33	9.81457e-08			0.000335857		4.55781e-09
YPK_TSS_995	NC_010465	-	4175808		35	mTSS	ACT	YPK_3788	aidB	acyl-CoA dehydrogenase domain protein	1	1	1	1	0	0	11	66	34	12	3	1			0.4	5.20286e-17					5.47638e-10	1.91145e-14	0	0.000493522
YPK_TSS_996	NC_010465	-	4181950	4181949	23	mTSS	AAG	YPK_3793	purA	adenylosuccinate synthase	1	1	1	1	1	1	47	85	53	14	144	83	0.29	6.36251e-16	0.25	3.01294e-55	0.28	3.10921e-20	0	1.04328e-07		0.0117082
YPK_TSS_997	NC_010465	-	4186696		90	mTSS	TAC	YPK_3799	hfq	RNA chaperone Hfq	1	1	1	0	1	0	76	49	21	9	13	0	0.07	1.83454e-50	0	2.43414e-36	0.2	1.23235e-06			0	6.80446e-09	0
YPK_TSS_998	NC_010465	-	4187061		455	mTSS	TTG	YPK_3799	hfq	RNA chaperone Hfq	1	1	1	1	1	1	19	26	28	19	39	27	0.4	0.000283449	0.41	5.14282e-06	0.39	0.00030078			1.03481e-09	0.0259914	0
YPK_TSS_999	NC_010465	-	4187115		509	mTSS	AAC	YPK_3799	hfq	RNA chaperone Hfq	1	1	1	1	1	1	107	174	90	170	29	15	0.03	4.16872e-110	0.04	1.54473e-177	0.07	4.50968e-79	0	3.78493e-187	0	0	0	2.80324e-13
YPK_TSS_1000	NC_010465	-	4196585		54	mTSS	TAT	YPK_3808	orn	oligoribonuclease	0	0	1	0	0	0	1	0	14	0	1	1											0.000117284
YPK_TSS_1001	NC_010465	+	4196602		129	mTSS	GTC	YPK_3809	rsgA	ribosome small subunit-dependent GTPase A	1	0	0	0	0	0	12	2	8	0	2	0	0	5.50568e-08							6.93324e-05		3.13236e-06
YPK_TSS_1002	NC_010465	+	4208796	4208795	63	mTSS	CCA	YPK_3819		lysine 2,3-aminomutase YodO family protein	1	1	0	1	1	0	24	51	7	24	29	5	0.04	5.91486e-20	0	7.48305e-56			0	1.25643e-24	5.58355e-12	2.41442e-06	7.97671e-08
YPK_TSS_1003	NC_010465	-	4208837		38	mTSS	ATT	YPK_3818	efp-2	translation elongation factor P	1	0	1	0	0	0	20	2	19	1	2	0									0		0
YPK_TSS_1004	NC_010465	-	4209165		366	mTSS	GTT	YPK_3818	efp-2	translation elongation factor P	1	0	1	0	0	0	7	2	32	1	0	0	0	0.000138823			0.29	4.70357e-20			0.00243816		0
YPK_TSS_1005	NC_010465	-	4211028		295	mTSS	GCT	YPK_3821		conserved hypothetical protein	1	1	1	0	0	0	6	5	3	0	0	0	0	0.000798346	0	0.00195805							0.0158729
YPK_TSS_1006	NC_010465	-	4213417		73	mTSS	ACG	YPK_3823	groES	chaperonin Cpn10	1	0	1	0	0	0	270	7	454	5	10	6	0.45	1.20264e-69			0.34	4.11894e-63			0		0
YPK_TSS_1007	NC_010465	-	4213719		375	mTSS	TTT	YPK_3823	groES	chaperonin Cpn10	1	0	1	1	0	0	10	3	47	10	4	2					0.43	3.61552e-06	0	8.8355e-09	4.65902e-09		0
YPK_TSS_1008	NC_010465	-	4214318		132	mTSS	TTG	YPK_3824	fxsA	FxsA cytoplasmic membrane protein	1	0	0	1	0	0	25	1	5	10	0	2	0	3.73093e-27					0	2.83711e-09	0		0.000229222
YPK_TSS_1009	NC_010465	+	4214336		274	mTSS	GAA	YPK_3825	aspA	aspartate ammonia-lyase	0	0	0	1	0	0	3	21	6	10	6	5										0.0118408	0.00154175
YPK_TSS_1010	NC_010465	+	4214489		121	mTSS	AGC	YPK_3825	aspA	aspartate ammonia-lyase	1	1	1	0	0	0	25	10	56	4	0	0	0.19	7.51335e-16	0	1.57311e-08	0.17	4.20034e-25			0		0
YPK_TSS_1011	NC_010465	-	4214548		362	mTSS	GTA	YPK_3824	fxsA	FxsA cytoplasmic membrane protein	1	1	0	1	1	0	13	15	6	18	10	4	0.19	4.76418e-09	0.49	2.2173e-06			0	1.67331e-17	5.39373e-09	0.00611077	3.26731e-05	0.00297281
YPK_TSS_1012	NC_010465	+	4217573		79	mTSS	GTA	YPK_3827	cutA	CutA1 divalent ion tolerance protein	1	1	1	1	0	0	15	35	17	18	4	0	0	1.24799e-17	0	1.15724e-39	0.13	1.4225e-11	0	9.4707e-16	9.5628e-13	0.00638155	0	0.0114707
YPK_TSS_1013	NC_010465	+	4224907		114	mTSS	TCA	YPK_3832		transcriptional regulator, TetR family	0	1	0	0	0	0	4	20	6	1	2	0											2.58663e-13
YPK_TSS_1014	NC_010465	+	4229200		32	mTSS	GTA	YPK_3837		conserved hypothetical protein	0	0	1	0	0	0	9	1	11	7	1	0									2.92807e-07		2.09003e-07	0.0395163
YPK_TSS_1015	NC_010465	-	4232603		35	mTSS	TCA	YPK_3841	rhaR	transcriptional regulator, AraC family	0	1	1	1	0	0	9	30	34	14	0	0					0.18	5.20512e-27	0	1.33438e-15	1.13664e-07	0.00499519	0	0.00123943
YPK_TSS_1016	NC_010465	-	4245467		171	mTSS	CGA	YPK_3853	tyrB	aromatic-amino-acid transaminase	1	1	0	0	0	0	13	37	7	2	8	1	0.27	3.11837e-06	0	2.31e-42					9.73235e-12	0.000305126	4.78807e-12
YPK_TSS_1017	NC_010465	-	4251575	4251576	79	mTSS	CCA	YPK_3858	dusA	tRNA-dihydrouridine synthase A	1	1	1	0	1	1	11	15	37	3	11	10	0.3	8.7249e-05			0.09	2.35154e-31			0	0.00910176	0
YPK_TSS_1018	NC_010465	+	4251725		23	mTSS	AAT	YPK_3859	zur	zinc uptake transcriptional repressor	1	1	1	0	0	0	26	23	28	7	3	1	0.41	3.32449e-13							0	0.01247	0
YPK_TSS_1019	NC_010465	+	4253644		29	mTSS	GAA	YPK_3862	pslB	glycerol-3-phosphate O-acyltransferase	1	1	1	0	0	0	75	18	74	8	6	2	0.26	2.98826e-50	0	0	0.25	1.51355e-44			0	0.000323572	0
YPK_TSS_1020	NC_010465	-	4257247		41	mTSS	AGC	YPK_3863	ubiA	4-hydroxybenzoate polyprenyl transferase	0	0	0	0	1	0	0	0	0	0	28	0
YPK_TSS_1021	NC_010465	-	4278307		50	mTSS	ATG	YPK_3877	terZ	stress protein	1	1	1	1	0	0	38	12	25	24	1	0	0.07	4.3116e-37			0.34	1.33841e-11			0		0	0.000593073
YPK_TSS_1022	NC_010465	+	4321238		18	mTSS	ACC	YPK_3921	acs	acetate-CoA ligase	0	0	1	0	0	0	2	19	18	5	0	0										0.00118993	1.46477e-08
YPK_TSS_1023	NC_010465	-	4338122		29	mTSS	TTA	YPK_3932	pepQ	peptidase M24	1	0	0	0	0	0	13	3	8	0	1	0	0.08	1.4996e-08							1.22977e-11
YPK_TSS_1024	NC_010465	+	4338375		45	mTSS	ATA	YPK_3933	fadB	fatty oxidation complex, alpha subunit FadB	0	1	1	1	0	0	6	16	60	91	1	0					0.42	4.38726e-13	0.46	9.75538e-34	3.01302e-05	0.00726583	0	1.99377e-10
YPK_TSS_1025	NC_010465	-	4344213		-7	rmTSS	TCC	YPK_3936	ubiD	UbiD family decarboxylase	1	1	0	0	0	0	54	12	23	3	5	1	0.43	1.79742e-23	0	3.25985e-12					0		0
YPK_TSS_1026	NC_010465	+	4344341		103	mTSS	GCT	YPK_3937	rfaH	transcriptional acivator RfaH	1	1	1	0	0	0	14	7	6	0	0	0	0	3.21006e-14			0.16	0.000313682			1.30005e-11		1.92314e-08
YPK_TSS_1027	NC_010465	+	4344421		23	mTSS	AGT	YPK_3937	rfaH	transcriptional acivator RfaH	0	0	0	1	1	0	9	7	8	12	10	8							0.44	0.0220334	2.40186e-06	0.00934042	5.64052e-13	0.019805
YPK_TSS_1028	NC_010465	-	4348665		37	mTSS	TCT	YPK_3942	tatA	twin-arginine translocation protein, TatA/E family subunit	1	0	1	0	0	0	23	4	17	1	2	1	0.19	2.68251e-14			0.15	5.54218e-09			0		0
YPK_TSS_1029	NC_010465	-	4350462		23	mTSS	TGG	YPK_3943	ubiB	2-polyprenylphenol 6-hydroxylase	0	1	0	0	1	0	0	50	1	4	16	3			0	2.36911e-40						2.68792e-09
YPK_TSS_1030	NC_010465	-	4351889		31	mTSS	GAA	YPK_3945	ubiE	ubiquinone/menaquinone biosynthesis methyltransferase	1	1	1	1	0	0	77	27	87	32	6	7	0	1.80724e-54	0	3.83e-20	0.02	1.01906e-50	0	1.28896e-24	0	0.00121094	0	0.000778414
YPK_TSS_1031	NC_010465	-	4358414		47	mTSS	TTT	YPK_3950	udp	uridine phosphorylase	1	0	1	0	0	0	59	3	39	0	2	0									0		0
YPK_TSS_1032	NC_010465	-	4365959	4365958	26	mTSS	GCT	YPK_3956		conserved hypothetical protein	0	1	0	1	0	0	7	21	10	10	3	1			0	1.14249e-20							1.00772e-07
YPK_TSS_1033	NC_010465	-	4367149		123	mTSS	TTC	YPK_3957	yfdV	auxin efflux carrier	1	1	1	0	0	0	48	14	47	7	6	1	0.02	5.48128e-56	0	8.26031e-18	0	6.79491e-53			0	0.00631111	0
YPK_TSS_1034	NC_010465	-	4386800		43	mTSS	CTG	YPK_3976	rpoH	RNA polymerase, sigma 32 subunit, RpoH	1	1	1	1	1	1	351	96	352	205	153	59	0.25	2.40523e-231	0.28	7.80715e-64	0.33	5.10814e-180			0	3.69999e-13	0	0
YPK_TSS_1035	NC_010465	-	4386836		79	mTSS	CTT	YPK_3976	rpoH	RNA polymerase, sigma 32 subunit, RpoH	1	0	1	0	0	0	35	1	24	0	1	0	0.03	2.35545e-11			0.07	1.48888e-05			0		0
YPK_TSS_1036	NC_010465	-	4387044		287	mTSS	TAT	YPK_3976	rpoH	RNA polymerase, sigma 32 subunit, RpoH	1	1	1	0	1	0	34	32	22	9	23	9	0.2	5.04912e-14	0.42	9.15523e-09	0.35	5.59266e-06			0	2.8654e-05	0
YPK_TSS_1037	NC_010465	-	4392642		42	mTSS	ATT	YPK_3983		domain of unknown function DUF1820	1	1	1	0	0	0	14	14	17	5	1	0	0.32	8.47292e-07	0.46	0.000827702					4.3595e-10	0.01481	0
YPK_TSS_1038	NC_010465	+	4392806		84	mTSS	GTT	YPK_3984	yhhN	YhhN family protein	1	1	1	1	0	0	24	55	22	27	7	1	0	1.96704e-27	0	7.15154e-59	0.05	6.58778e-21	0	3.25938e-27	0	5.47325e-10	0	0.00120359
YPK_TSS_1039	NC_010465	-	4392808		208	mTSS	ACA	YPK_3983		domain of unknown function DUF1820	1	0	1	0	0	0	20	8	13	6	4	1	0	1.41232e-22			0	6.52743e-13			4.82675e-12	0.0233141	2.42488e-05
YPK_TSS_1040	NC_010465	+	4396661		220	mTSS	ATA	YPK_3987	yhhQ	conserved hypothetical integral membrane protein	0	0	0	0	1	0	3	5	0	6	12	9
YPK_TSS_1041	NC_010465	+	4396814		67	mTSS	GCG	YPK_3987	yhhQ	conserved hypothetical integral membrane protein	1	0	0	0	0	0	85	2	9	0	1	0	0	1.11086e-101							0		2.33313e-05
YPK_TSS_1042	NC_010465	+	4397586		93	mTSS	ACT	YPK_3988	drcB	putative lipoprotein	0	1	0	0	0	0	6	10	7	5	7	7			0	4.92334e-09							4.56074e-07
YPK_TSS_1043	NC_010465	-	4412119		44	mTSS	TTT	YPK_3999	pldA	phospholipase A(2)	1	0	0	0	0	0	24	7	8	0	4	1									0	0.00732156	7.00029e-07
YPK_TSS_1044	NC_010465	-	4414927		135	mTSS	GGT	YPK_4002	corA	magnesium and cobalt transport protein CorA	1	0	0	0	0	0	35	4	8	0	2	2									0		6.64085e-05
YPK_TSS_1045	NC_010465	-	4415039		247	mTSS	CTA	YPK_4002	corA	magnesium and cobalt transport protein CorA	1	1	1	1	1	0	94	10	20	3	3	1	0.02	4.22434e-95	0	5.505e-10	0.05	2.34943e-17	0	0.00145201	0		0
YPK_TSS_1046	NC_010465	-	4417641		112	mTSS	TAC	YPK_4005		protein of unknown function UPF0261	0	0	0	1	0	0	0	0	6	60	0	2												4.27639e-07
YPK_TSS_1047	NC_010465	-	4417747		218	mTSS	CTG	YPK_4005		protein of unknown function UPF0261	0	0	1	1	0	0	0	0	38	53	0	0					0.05	6.07235e-28	0.17	2.58286e-22			0	0.000128891
YPK_TSS_1048	NC_010465	+	4417860	4417861	97	mTSS	AGA	YPK_4006		transcriptional regulator, TetR family	1	1	1	1	0	0	16	18	12	14	1	1	0.13	1.30789e-13	0.31	7.42264e-10							4.9542e-14	0.0398761
YPK_TSS_1049	NC_010465	-	4424705		86	mTSS	TGG	YPK_4012		putative lipoprotein	1	1	1	0	0	0	7	5	3	0	2	0	0.33	0.00444919	0	0.00015513					0.000113624
YPK_TSS_1050	NC_010465	+	4424725		28	mTSS	GGA	YPK_4013	cyaY	iron donor protein CyaY	1	0	1	0	0	0	14	3	20	2	9	1									1.44999e-09		0
YPK_TSS_1051	NC_010465	-	4428002		133	mTSS	TTT	YPK_4015	cyaA	putative adenylate cyclase	1	0	0	1	1	1	16	50	14	19	35	11	0	1.23184e-17					0	6.61783e-19	0	4.53762e-14	0	0.0359234
YPK_TSS_1052	NC_010465	-	4436753		186	mTSS	GCA	YPK_4022	wecG	glycosyl transferase, WecB/TagA/CpsF family	1	0	1	0	0	0	12	3	16	5	1	2	0	2.14399e-11			0	9.79275e-15			7.11509e-05		6.93633e-12
YPK_TSS_1053	NC_010465	-	4451444		328	mTSS	CTG	YPK_4034	rho	transcription termination factor Rho	1	1	1	1	1	0	79	66	28	81	150	5	0.03	2.0446e-68	0.24	6.61238e-27	0.07	5.90236e-16	0	1.66124e-74	0	6.43001e-14	0	7.07933e-11
YPK_TSS_1054	NC_010465	-	4451980		58	mTSS	TCC	YPK_4035	trxA	thioredoxin	1	0	1	0	0	0	61	12	50	13	13	6									0	0.0225077	0
YPK_TSS_1055	NC_010465	-	4452020		98	mTSS	ACT	YPK_4035	trxA	thioredoxin	1	1	0	0	1	1	15	11	5	5	27	19	0.3	0.00122767	0	7.04304e-05					4.11336e-10	0.0229555	8.64986e-06
YPK_TSS_1056	NC_010465	-	4452298		376	mTSS	CGT	YPK_4035	trxA	thioredoxin	0	1	0	0	0	0	2	27	3	0	8	1			0	7.04624e-28						0.00115832
YPK_TSS_1057	NC_010465	-	4457046		30	mTSS	CCC	YPK_4038	rep	ATP-dependent DNA helicase Rep	1	0	1	0	0	0	21	1	26	0	0	1	0.34	1.32102e-17			0.17	5.18521e-21			1.68641e-11		0
YPK_TSS_1058	NC_010465	+	4457146		59	mTSS	GCT	YPK_4040	ppiC	PpiC-type peptidyl-prolyl cis-trans isomerase	1	0	1	0	0	0	58	2	14	0	1	0	0.18	5.71981e-39							0		2.45852e-10
YPK_TSS_1059	NC_010465	-	4481056		274	mTSS	TTC	YPK_4061	ilvG	acetolactate synthase, large subunit, biosynthetic type	1	1	0	0	0	0	10	13	5	7	6	2	0.09	6.66658e-11	0	1.27724e-14					1.13487e-11	0.00985751	1.28184e-07
YPK_TSS_1060	NC_010465	+	4483454		188	mTSS	GAC	YPK_4064	hdfR	transcriptional regulator, LysR family	1	1	0	0	0	0	15	14	8	4	12	6	0.43	6.11749e-10	0	2.9978e-18					1.22341e-09	0.0083823
YPK_TSS_1061	NC_010465	-	4483562		39	mTSS	TAA	YPK_4063	yifE	protein of unknown function DUF413	1	0	1	0	1	0	83	8	114	5	10	2									0		0
YPK_TSS_1062	NC_010465	-	4498938		315	mTSS	CGG	YPK_4073	btuB	TonB-dependent vitamin B12 receptor	1	0	0	0	1	0	16	2	1	0	6	0	0.2	1.68851e-14							5.1946e-12
YPK_TSS_1063	NC_010465	+	4499048		37	mTSS	GAT	YPK_4074	trmA	tRNA (uracil-5-)-methyltransferase	1	0	0	0	0	0	12	1	9	0	1	0									7.20907e-11		2.35826e-07
YPK_TSS_1064	NC_010465	-	4501420		43	mTSS	TAT	YPK_4076	fabR	transcriptional regulator, TetR family	1	0	0	0	0	0	11	0	2	1	3	0	0.49	2.07975e-05							1.24081e-05
YPK_TSS_1065	NC_010465	+	4501564		31	mTSS	GTA	YPK_4078	sthA	pyridine nucleotide-disulphide oxidoreductase dimerisation region	1	1	1	1	1	1	20	53	61	16	27	10	0.07	1.2163e-19	0	1.74746e-61	0.27	1.77682e-42	0	6.73654e-17	0	4.73204e-07	0	0.0233774
YPK_TSS_1066	NC_010465	+	4528292		240	mTSS	GGC	YPK_4096	metJ	methionine repressor, MetJ	1	1	0	1	0	0	3	4	1	3	0	0	0	0.023267	0	0.000673131			0	0.00257099
YPK_TSS_1067	NC_010465	+	4528489		43	mTSS	GTT	YPK_4096	metJ	methionine repressor, MetJ	1	1	1	0	0	0	51	20	52	6	3	1	0.36	5.77623e-33	0	1.24428e-20					0	0.0070397	0
YPK_TSS_1068	NC_010465	-	4530501		108	mTSS	TCC	YPK_4098	rpmE	ribosomal protein L31	0	0	0	0	1	0	43	7	58	1	62	3									4.47082e-07		0
YPK_TSS_1069	NC_010465	-	4530525		132	mTSS	CCT	YPK_4098	rpmE	ribosomal protein L31	1	0	1	0	0	0	276	1	190	0	1	0	0	0			0.03	5.42714e-126			0		0
YPK_TSS_1070	NC_010465	-	4530565		172	mTSS	TTC	YPK_4098	rpmE	ribosomal protein L31	1	0	0	0	0	0	15	8	7	2	5	1	0.3	0.00356944							6.53533e-06	0.0181762	0.00501235
YPK_TSS_1071	NC_010465	+	4535168		68	mTSS	AAT	YPK_4103	hslV	20S proteasome A and B subunits	1	0	0	1	0	0	22	0	5	14	2	4	0.35	7.44683e-09					0.44	0.000100109	0			0.00491592
YPK_TSS_1072	NC_010465	+	4538430	4538429	26	mTSS	CCC	YPK_4106	menG	regulator of ribonuclease activity A	1	1	1	1	0	1	17	14	23	14	7	11	0.15	1.50329e-13			0.31	8.49261e-14			0	0.000743577	0	0.0391286
YPK_TSS_1073	NC_010465	-	4539861		219	mTSS	AAA	YPK_4107		conserved hypothetical protein	0	0	0	0	1	0	0	0	0	0	16	0
YPK_TSS_1074	NC_010465	-	4540571		60	mTSS	AGC	YPK_4108		conserved hypothetical protein	1	1	1	1	1	0	22	60	28	12	301	1	0.05	2.18092e-20			0.15	2.34748e-19			0	0	0	0.00976692
YPK_TSS_1075	NC_010465	-	4544806		103	mTSS	TTC	YPK_4111	zapB	septal ring assembly protein ZapB	1	1	1	0	0	0	113	16	164	8	13	0									0	0.00146062	0
YPK_TSS_1076	NC_010465	+	4545359		68	mTSS	ATC	YPK_4112	glpF	MIP family channel protein	1	1	1	1	0	0	846	13	63	21	1	0	0.12	0							0	0.00906315	0
YPK_TSS_1077	NC_010465	-	4550964	4550965	99	mTSS	AAA	YPK_4116		protein of unknown function DUF805	1	0	1	0	0	0	10	5	10	3	1	0	0	1.21327e-08							5.21004e-07		6.13159e-10
YPK_TSS_1078	NC_010465	+	4551053		26	mTSS	ATA	YPK_4117		protein of unknown function DUF1454	1	1	1	1	0	0	9	4	3	8	1	0	0.11	1.37223e-08							1.26146e-09		8.03197e-07
YPK_TSS_1079	NC_010465	+	4551778		65	mTSS	AGG	YPK_4118	tpiA	triose-phosphate isomerase	1	0	0	0	1	0	58	6	24	2	11	0									0		0
YPK_TSS_1080	NC_010465	-	4564319		38	mTSS	TTG	YPK_4131	cpxP	protein of unknown function Spy-related	1	1	1	1	0	0	15	11	17	40	7	4	0.36	1.91583e-09	0	1.89747e-10			0	4.59702e-37	4.04505e-12		1.65216e-08	0.000125607
YPK_TSS_1081	NC_010465	+	4564439		16	mTSS	GAG	YPK_4132	cpxR	two component transcriptional regulator, winged helix family	1	0	0	0	0	0	11	6	8	5	2	1	0.14	1.70308e-09							2.76348e-07		3.13553e-08
YPK_TSS_1082	NC_010465	+	4567810		18	mTSS	CTC	YPK_4135	trmL, cspR	RNA methyltransferase, TrmH family, group 2	1	0	0	0	0	0	11	0	1	0	1	0	0.24	4.89672e-09							2.19825e-10
YPK_TSS_1083	NC_010465	-	4571950		40	mTSS	TTG	YPK_4140		rhodanese domain protein	1	0	0	0	0	0	11	1	3	0	0	0	0.32	0.0172667							2.63013e-10
YPK_TSS_1084	NC_010465	+	4573864		0	lmTSS	ATG	YPK_4142		peptidase M23B	1	1	1	1	1	1	41	28	29	20	36	10	0.25	6.91333e-28			0.37	1.86071e-16	0	1.92087e-21	0	0.000405709	0	0.0170557
YPK_TSS_1085	NC_010465	-	4578680	4578682	28	mTSS	CAA	YPK_4145	kbl	2-amino-3-ketobutyrate coenzyme A ligase	1	1	1	1	0	0	33	38	192	28	2	1					0.32	4.57531e-96	0.34	6.47359e-18	0	1.40158e-05	0	0.000924841
YPK_TSS_1086	NC_010465	+	4578843		55	mTSS	CAA	YPK_4146	rfaD	ADP-L-glycero-D-manno-heptose-6-epimerase	1	0	1	1	0	0	37	8	30	10	4	2									0		0	0.0184996
YPK_TSS_1087	NC_010465	+	4582285		-17	rmTSS	AAT	YPK_4149	kdtA	three-deoxy-D-manno-octulosonic-acid transferase domain protein	0	1	0	0	1	0	8	31	7	21	14	3			0.45	1.81039e-11					2.80639e-07	2.47537e-05	3.8794e-07	0.0133984
YPK_TSS_1088	NC_010465	-	4586234		75	mTSS	ATG	YPK_4154	rpmB	ribosomal protein L28	1	1	1	0	1	0	1254	45	607	9	94	6			0.49	8.17239e-09					0	8.64761e-06	0
YPK_TSS_1089	NC_010465	-	4586343		184	mTSS	CCT	YPK_4154	rpmB	ribosomal protein L28	1	1	1	0	0	0	154	13	12	0	3	0	0.07	2.93759e-40	0	2.52301e-05	0	0.0118166			0	0.00242536	6.94394e-11
YPK_TSS_1090	NC_010465	-	4586569		410	mTSS	TCT	YPK_4154	rpmB	ribosomal protein L28	1	0	1	0	0	0	24	2	11	0	10	1	0.13	0.000200285			0	0.000792728			6.7839e-07		3.52788e-05
YPK_TSS_1091	NC_010465	-	4586649		490	mTSS	TAG	YPK_4154	rpmB	ribosomal protein L28	1	1	1	1	1	0	164	62	74	18	15	1	0.03	6.59392e-127	0.16	6.45899e-43	0.02	6.29219e-64	0	4.50159e-20	0	5.5063e-13	0
YPK_TSS_1092	NC_010465	-	4587118		28	mTSS	TAG	YPK_4155	radC	DNA repair protein RadC	0	1	1	1	0	0	7	10	17	14	0	0			0	2.54416e-13	0.12	2.1849e-17			1.09791e-05		0	0.0182159
YPK_TSS_1093	NC_010465	+	4587259		28	mTSS	TCT	YPK_4156	dfp	phosphopantothenoylcysteine decarboxylase/phosphopantothenate--cysteine ligase	0	0	1	0	0	0	7	6	13	4	2	0					0.44	6.19548e-07			8.10124e-06	0.00910251	3.98099e-10
YPK_TSS_1094	NC_010465	-	4591350	4591351	30	mTSS	CAA	YPK_4160	rph	ribonuclease PH	1	0	1	0	0	0	18	5	11	0	1	0					0.48	0.00274993			0		1.32367e-08
YPK_TSS_1095	NC_010465	+	4591419		28	mTSS	ATC	YPK_4161		YicC domain protein	1	0	1	0	0	0	31	6	33	1	8	1					0.36	1.79978e-25			2.30275e-14		0
YPK_TSS_1096	NC_010465	+	4592421		77	mTSS	GTA	YPK_4162		integrase family protein	1	1	1	1	0	0	19	16	28	40	7	5	0.15	7.06743e-14	0	1.91997e-14	0.21	1.16462e-13	0	2.06154e-44	0	0.00774859	0	5.52224e-05
YPK_TSS_1097	NC_010465	+	4604393		323	mTSS	AGT	YPK_4176	gmk	guanylate kinase	1	1	1	1	1	1	26	11	13	12	29	10	0.23	1.71351e-11	0.37	0.0454535	0.2	1.11996e-09			0	0.000904623	3.82725e-11
YPK_TSS_1098	NC_010465	+	4604546		170	mTSS	AGA	YPK_4176	gmk	guanylate kinase	1	1	0	1	1	0	75	18	8	13	34	5			0	9.85014e-16			0	1.65785e-09	0	0.0173457	1.56471e-08	0.0222988
YPK_TSS_1099	NC_010465	+	4605364	4605363	30	mTSS	TCA	YPK_4177	rpoZ	DNA-directed RNA polymerase, omega subunit	1	1	0	0	0	0	45	16	16	2	4	0	0.18	8.83658e-19	0	5.86875e-13					3.80871e-07		0
YPK_TSS_1100	NC_010465	+	4613896		30	mTSS	TCC	YPK_4183		AsmA family protein	0	1	1	0	0	0	8	14	10	3	5	1			0	3.00075e-16	0.06	5.7444e-12					0
YPK_TSS_1101	NC_010465	-	4618917	4618919	23	mTSS	ACC	YPK_4187	yrfG-4, yigB-4, yihX-4	HAD-superfamily hydrolase, subfamily IA, variant 3	0	1	0	0	1	0	3	12	4	1	17	0
YPK_TSS_1102	NC_010465	-	4621070		31	mTSS	CTA	YPK_4188	bipA	GTP-binding protein TypA	1	0	1	0	1	0	191	8	68	0	17	4	0.17	9.54441e-107			0.36	3.88761e-09			0		0
YPK_TSS_1103	NC_010465	-	4621223		184	mTSS	TTT	YPK_4188	bipA	GTP-binding protein TypA	1	0	0	0	0	0	17	0	7	0	0	0									4.43528e-10		2.9689e-05
YPK_TSS_1104	NC_010465	-	4621277		238	mTSS	TGC	YPK_4188	bipA	GTP-binding protein TypA	1	0	1	0	0	0	70	8	30	5	4	2	0.16	9.32545e-37			0.22	1.02823e-11			0	0.0122229	0
YPK_TSS_1105	NC_010465	+	4621481		120	mTSS	TTT	YPK_4189	glnA	glutamine synthetase, type I	1	0	0	0	0	0	10	1	1	0	1	0									0.000312686
YPK_TSS_1106	NC_010465	+	4621515		86	mTSS	CGG	YPK_4189	glnA	glutamine synthetase, type I	1	0	1	0	0	0	69	5	17	0	3	0									0		0
YPK_TSS_1107	NC_010465	-	4627941		33	mTSS	TCC	YPK_4193	yihI	protein of unknown function DUF414	1	0	1	0	0	0	31	1	31	2	1	0									5.12402e-10		0
YPK_TSS_1108	NC_010465	-	4628034		126	mTSS	ATC	YPK_4193	yihI	protein of unknown function DUF414	1	0	1	0	0	0	22	2	23	1	1	0									3.25821e-09		0
YPK_TSS_1109	NC_010465	+	4628620		32	mTSS	ATA	YPK_4194	engB	ribosome biogenesis GTP-binding protein YsxC	1	0	0	0	0	0	13	2	7	1	1	0	0.26	3.50611e-08							1.38494e-12		4.54197e-14
YPK_TSS_1110	NC_010465	-	4632540	4632539	32	mTSS	AGA	YPK_4195	polA	DNA polymerase I	1	1	1	1	0	0	19	15	30	10	6	2							0	5.67225e-11			1.032e-06
YPK_TSS_1111	NC_010465	-	4635022		26	mTSS	TCT	YPK_4198	yihD	protein of unknown function DUF1040	1	1	1	0	0	0	27	13	45	8	6	4	0.19	5.25349e-18			0.27	1.2834e-24			0	0.000240355	0
YPK_TSS_1112	NC_010465	-	4647572	4647571	30	mTSS	AGC	YPK_4210	rbsD	RbsD or FucU transport	1	1	1	1	0	0	23	68	79	15	6	2	0.34	1.8158e-21	0.43	1.34171e-16			0	3.90046e-08		4.86946e-10		0.0363739
YPK_TSS_1113	NC_010465	-	4654032		44	mTSS	AGC	YPK_4214	asnA	aspartate-ammonia ligase	1	0	1	1	0	0	16	1	12	11	0	0					0.38	0.028899	0	7.1867e-10	0		0	0.0218894
YPK_TSS_1114	NC_010465	+	4654687	4654688	25	mTSS	CTC	YPK_4216	mioC	flavodoxin/nitric oxide synthase	1	1	1	0	1	0	14	34	41	3	20	6	0	3.06826e-09	0.19	6.43484e-23	0.31	4.24291e-24			1.44882e-10		3.59243e-13
YPK_TSS_1115	NC_010465	+	4655488		45	mTSS	CCC	YPK_4217	gidA	glucose inhibited division protein A	1	0	1	0	0	0	15	0	11	0	0	0	0.2	2.20524e-07							1.7559e-10
YPK_TSS_1116	NC_010465	+	4658768		86	mTSS	GTT	YPK_4219	atpI	ATP synthase I chain	1	0	1	0	0	0	45	4	18	2	0	0	0.04	4.04979e-41			0	1.08215e-18			0		1.77651e-09
YPK_TSS_1117	NC_010465	+	4666544		26	mTSS	ATT	YPK_4228	glmU	UDP-N-acetylglucosamine pyrophosphorylase	1	0	1	0	0	0	25	1	13	0	1	0					0.36	4.53557e-05			0		2.34461e-08
YPK_TSS_1118	NC_010465	+	4668028		113	mTSS	AAA	YPK_4229	glmS	glucosamine--fructose-6-phosphate aminotransferase, isomerizing	1	1	1	0	1	0	73	12	25	6	16	4									0	0.00915567	0
YPK_TSS_1119	NC_010465	+	4668089		52	mTSS	TCA	YPK_4229	glmS	glucosamine--fructose-6-phosphate aminotransferase, isomerizing	0	0	1	0	0	0	12	7	26	0	0	2									3.19357e-06		0
YPK_TSS_1120	NC_010465	+	4670272		181	mTSS	GCA	YPK_4231	pstS-2	phosphate ABC transporter, periplasmic phosphate-binding protein	1	0	1	0	0	0	43	0	28	0	1	0	0.08	3.95836e-44			0.08	2.87102e-26			0		0
YPK_TSS_1121	NC_010465	+	4670288		165	mTSS	GAT	YPK_4231	pstS-2	phosphate ABC transporter, periplasmic phosphate-binding protein	0	1	0	0	0	0	0	15	2	1	1	0			0.39	2.32173e-05						0.0135598
YPK_TSS_1122	NC_010465	+	4676382		33	mTSS	AAC	YPK_4237		extracellular solute-binding protein family 3	0	0	1	0	1	1	5	4	16	0	89	10					0.37	2.98163e-10			0.000171082		0
YPK_TSS_1123	NC_010465	-	4679671		34	mTSS	ACT	YPK_4240		HAD-superfamily hydrolase, subfamily IA, variant 3	0	0	0	0	1	0	6	5	1	2	12	1
YPK_TSS_1124	NC_010465	+	4680099		31	mTSS	GAC	YPK_4241	yieG	Xanthine/uracil/vitamin C permease	1	0	1	0	0	0	32	3	16	0	1	0	0.06	1.20133e-36			0.32	4.28852e-12			0		0
YPK_TSS_1125	NC_010465	-	4686284		83	mTSS	GAA	YPK_4245	trmE	tRNA modification GTPase TrmE	1	0	0	0	0	0	10	0	5	0	1	1									1.64399e-05		0.0001255
YPK_TSS_1126	NC_010465	-	4688828	4688825;4688827	102	mTSS	CTT	YPK_4249	rpmH	ribosomal protein L34	1	1	1	1	1	0	253	17	110	34	103	9	0.3	2.65693e-20	0	0.0303715	0.26	1.10139e-12	0	8.98403e-29			0
YPK_TSS_1127	NC_010465	-	4688990	4688991	264	mTSS	CTA	YPK_4249	rpmH	ribosomal protein L34	1	1	1	0	1	0	79	23	15	4	15	2	0.05	1.29503e-09	0.21	0.000487062	0.11	0.00976298			0	0.000959084	0
ID: identity
TSS: transcriptional start site
UTR: untranslated region
nt: nucleotide
1Orientation of the predicted TSS on the Y. pseudotuberculosis YPIII chromosome or pYV virulence plasmid (("+") forward and ("-") reverse strand according to NC_010465 for the chromosome or NC_006153 for the pYV virulence plasmid).
2Genomic coordinates of the predicted TSS on the Y. pseudotuberculosis YPIII chromosome or pYV virulence plasmid according to the forward strand.
3Indicates an alternative TSS location, as the respective TSS could not be mapped to a single nucleotide position.
4Distance between the predicted TSS and the annotated translational start site of the downstream located gene.
5Denotes the TSS category: mTSS (TSS of messenger RNAs; lmTSS (TSS of leaderless mRNAs); rmTSS (TSS of mRNAs to be reannotated).
6Denotes the first 3 synthesized 5' nucleotides of the respective mRNA.
7Indicates if a TSS was bioinformatically predicted within the respective cDNA libraries; 1: identified; 0: not identified.
8Mean deep sequencing read counts for a particular TSS under the given condition, normalized to 1 million uniquely mapped cDNA reads.
9Depletion factor ≤ 0.5 points of the given TSS is at least 2-fold less abundant in libraries generated from RNA not treated with TAP enzyme, indicating a primary transcript.
10p-values of TSSAR TSS predictions (Amman et al., 2014) were added to the set of identified TSS.

## Sheet: 5'RACE
Dataset S2-2: TSS(s) of the selected genes mapped by Illumina sequencing and 5’ RACE.
Gene	Position mapped by Illumina sequencing1	Position mapped by 5’ RACE1
YPK_0152 (glpD)	-47	-47
YPK_1918 (ldhA)	-65; -22	-64; -13
YPK_2072 (adhE)	-233; -48	-46
YPK_2380 (fliA)	-200; -28	-172; -27
YPK_2381 (fliC)	-65	-65
YPK_2650 (aspC)	-39	-38
YPK_2676 (focA)	-32; -44	-33; -44
YPK_3445 (sodC)	-63	-63
YPK_3761 (mdh)	-222; -48	-222; -49
YPK_4229 (glmS)	-113; -52	-110; -50
1The indicated positions are relative to the annotated start codon in the Y. pseudotuberculosis YPIII genome.

## Sheet: Riboswitch-like elements
Dataset S2-3: Predicted Y. pseudotuberculosis YPIII riboswitch-like elements
TSS ID	Accession	Strand1	TSS location2	Length 5'-UTR3 [nt]	Associated feature	gene symbol	Annotated function	Predicetd riboswitch-like element4
YPK_TSS_55	NC_010465	+	263223	230	YPK_0225	aroK	shikimate kinase	RLE0243
YPK_TSS_61	NC_010465	-	291962	287	YPK_0248	crp	transcriptional regulator, Crp/Fnr family	RLE0214
YPK_TSS_60	NC_010465	-	291876	201	YPK_0248	crp	transcriptional regulator, Crp/Fnr family	RLE0214
YPK_TSS_122	NC_010465	-	553926	245	YPK_0500	pyrB	aspartate carbamoyltransferase	RLE0007/0016/0347
YPK_TSS_170	NC_010465	+	709558	432	YPK_0649	ribB	3,4-dihydroxy-2-butanone 4-phosphate synthase	RLE0011 FMN riboswitch
YPK_TSS_210	NC_010465	+	1041779	233	YPK_0923	prfB	peptide chain release factor 2	RLE0014
YPK_TSS_211	NC_010465	+	1041800	212	YPK_0923	prfB	peptide chain release factor 2	RLE0014
YPK_TSS_399	NC_010465	+	2014966	322	YPK_1816	mltE	lytic transglycosylase catalytic	RLE0013
YPK_TSS_579	NC_010465	+	2701574	201	YPK_2468	yebN	protein of unknown function DUF204	RLE0223 yybP-ykoY element
YPK_TSS_647	NC_010465	-	2938523	349	YPK_2668	rpsA	ribosomal protein S1	RLE0287
YPK_TSS_688	NC_010465	+	3072179	237	YPK_2784	spr	NLP/P60 protein	RLE0356
YPK_TSS_723	NC_010465	-	3220708	217	YPK_2922	moaA	molybdenum cofactor biosynthesis protein A	RLE0073 (Moco riboswitch*)
YPK_TSS_738	NC_010465	-	3258782	225	YPK_2960	ybgC	acyl-CoA thioester hydrolase YbgC	RLE0306
YPK_TSS_860	NC_010465	-	3684416	508	YPK_3357	aroF	phospho-2-dehydro-3-deoxyheptonate aldolase	RLE0160
YPK_TSS_938	NC_010465	-	3977526	218	YPK_3604	thrA	aspartate kinase	RLE0109 Threonine operon leader
YPK_TSS_947	NC_010465	-	4004027	490	YPK_3627	deoC-3	deoxyribose-phosphate aldolase	RLE0149
YPK_TSS_946	NC_010465	-	4003883	346	YPK_3627	deoC-3	deoxyribose-phosphate aldolase	RLE0149
YPK_TSS_1039	NC_010465	-	4392808	208	YPK_3983		domain of unknown function DUF1820	RLE0225
YPK_TSS_1040	NC_010465	+	4396661	220	YPK_3987	yhhQ	conserved hypothetical integral membrane protein	RLE0229
YPK_TSS_1045	NC_010465	-	4415039	247	YPK_4002	corA	magnesium and cobalt transport protein CorA	RLE0310
YPK_TSS_1053	NC_010465	-	4451444	328	YPK_4034	rho	transcription termination factor Rho	RLE0205
YPK_TSS_1056	NC_010465	-	4452298	376	YPK_4035	trxA	thioredoxin	RLE0316
YPK_TSS_1059	NC_010465	-	4481056	274	YPK_4061	ilvG	acetolactate synthase, large subunit, biosynthetic type	RLE0027
YPK_TSS_1062	NC_010465	-	4498938	315	YPK_4073	btuB	TonB-dependent vitamin B12 receptor	RLE0001 Cobalamin riboswitch
YPK_TSS_1104	NC_010465	-	4621277	238	YPK_4188	bipA	GTP-binding protein TypA	RLE0212
ID: identity
TSS: transcriptional start site
UTR: untranslated region
nt: nucleotide
*Regulski et al., 2008
1Orientation of the predicted TSS on the Y. pseudotuberculosis YPIII chromosome (("+") forward and ("-") reverse strand according to NC_010465 for the chromosome).
2Genomic coordinates of the predicted TSS on the Y. pseudotuberculosis YPIII chromosome according to the forward strand.
3Distance between the predicted TSS and the annotated translational start site of the downstream located gene.
4mRNAs with a 5'-UTR ≥ 200 nt were screened for putative riboswitch-like elements using the Ribex Riboswitch explorer (Abreu-Goodger & Merino, 2005).

## Sheet: Leaderless and reannotated mRNA
Dataset S2-4: Y. pseudotuberculosis YPIII leaderless and reannotated mRNAs
TSS ID	Accession ID	Strand1	TSS location2	Alternative TSS location3	Length 5'-UTR4 [nt]	TSS category5	First 3 nt6	Associated feature	Gene symbol	Gene description	Relative position of start codon in IP32953 [nt]7	Relative position of start codon in IP31758 [nt]7	Relative position of start codon in Y. pestis CO92 [nt]7	Relative position of start codon PB1/+ [nt]7
YPK_TSS_149	NC_010465	-	644292		8	lmTSS	ATG	YPK_0583	yapF	outer membrane autotransporter barrel domain protein
YPK_TSS_544	NC_010465	-	2612627		8	lmTSS	AAA	YPK_2377	yedO	pyridoxal phosphate-dependent enzyme, D-cysteine desulfhydrase family
YPK_TSS_720	NC_010465	-	3183170		7	lmTSS	CCA	YPK_2885	pbpG	peptidase S11 D-alanyl-D-alanine carboxypeptidase 1
YPKp_TSS_15	NC_006153	-	40466		5	lmTSS	GAT	pYV0058	lcrG	putative Yop regulator
YPK_TSS_330	NC_010465	-	1704858		5	lmTSS	GGC	YPK_1542	yfcH	cell division inhibitor
YPK_TSS_675	NC_010465	-	3035174		5	lmTSS	TCT	YPK_2751	fhuD-4, fepB-4, fecB-4	periplasmic binding protein
YPK_TSS_87	NC_010465	+	358424		4	lmTSS	ACT	YPK_0337	rplJ	ribosomal protein L10
YPK_TSS_455	NC_010465	+	2194757		2	lmTSS	ACA	YPK_1975		GAF modulated sigma54 specific transcriptional regulator, Fis family
YPK_TSS_359	NC_010465	+	1866068		0	lmTSS	ATG	YPK_1678	rluC	pseudouridine synthase, RluA family
YPK_TSS_534	NC_010465	-	2543391		0	lmTSS	TGG	YPK_2295		protein of unknown function DUF497
YPK_TSS_541	NC_010465	-	2603440		0	lmTSS	TGA	YPK_2368		conserved hypothetical protein
YPK_TSS_697	NC_010465	+	3113852		0	lmTSS	ATG	YPK_2829		transcriptional regulator, XRE family
YPK_TSS_781	NC_010465	+	3402788		0	lmTSS	ATG	YPK_3102		transcriptional regulator, XRE family
YPK_TSS_1084	NC_010465	+	4573864		0	lmTSS	ATG	YPK_4142		peptidase M23B
YPK_TSS_543	NC_010465	+	2608296		-2	rmTSS	GGC	YPK_2371		conserved hypothetical protein
YPK_TSS_913	NC_010465	+	3849649		-2	rmTSS	GAA	YPK_3502		conserved hypothetical protein
YPKp_TSS_11	NC_006153	-	21843	21842	-6	rmTSS	ACT	pYV0027		hypothetical protein				+33
YPK_TSS_1025	NC_010465	-	4344213		-7	rmTSS	TCC	YPK_3936	ubiD	UbiD family decarboxylase	+24	+24	+24
YPK_TSS_254	NC_010465	-	1318398		-8	rmTSS	ACT	YPK_1181	nadB	L-aspartate oxidase	0	+36	0
YPK_TSS_264	NC_010465	-	1377646		-8	rmTSS	CAC	YPK_1252		lytic transglycosylase catalytic	0	+81	+81
YPK_TSS_523	NC_010465	-	2420142	2420141	-8	rmTSS	AGA	YPK_2180	hemA	glutamyl-tRNA reductase	+54	+54	+54
YPK_TSS_750	NC_010465	+	3279335	3279336	-8	rmTSS	TAC	YPK_2980	smpB	tmRNA/SsrA-binding protein, determines stability of RNase R	+12	+12	+12
YPK_TSS_420	NC_010465	-	2074508	2074509	-9	rmTSS	AAT	YPK_1868	rnt	ribonuclease T	+33	+33	+33
YPK_TSS_570	NC_010465	-	2677096		-9	rmTSS	AAA	YPK_2444	yqfB	protein of unknown function DUF437
YPK_TSS_240	NC_010465	-	1245854		-10	rmTSS	TCT	YPK_1105	mltD	lytic transglycosylase catalytic	0	+39	0
YPK_TSS_667	NC_010465	+	2988167		-11	rmTSS	TAT	YPK_2705	ltaA	threonine aldolase	+36	+36	+36
YPK_TSS_782	NC_010465	+	3404146		-12	rmTSS	GAT	YPK_3104		conserved hypothetical protein
YPKp_TSS_14	NC_006153	-	34868	34869	-16	rmTSS	CAG	pYV0047	yopM	putative targeted effector protein				+63
YPK_TSS_289	NC_010465	-	1502696	1502695	-16	rmTSS	CCC	YPK_1361	gcvR	glycine cleavage system regulatory protein	+45	+45	+45
YPK_TSS_34	NC_010465	+	159920		-17	rmTSS	GCT	YPK_0132		conserved hypothetical protein
YPK_TSS_1087	NC_010465	+	4582285		-17	rmTSS	AAT	YPK_4149	kdtA	three-deoxy-D-manno-octulosonic-acid transferase domain protein	+42	+42	+42
YPK_TSS_965	NC_010465	-	4102334		-18	rmTSS	CTT	YPK_3714		sterol-binding domain protein	+81	+81	+81
YPK_TSS_273	NC_010465	+	1403139	1403140	-34	rmTSS	TTC	YPK_1275	iscR	transcriptional regulator, BadM/Rrf2 family	+63	+63	+63
YPK_TSS_125	NC_010465	-	569591		-37	rmTSS	CCC	YPK_0519	degS	periplasmic serine protease DegS	+63	+63	+63
YPK_TSS_155	NC_010465	-	685898		-47	rmTSS	GAA	YPK_0625		hypothetical protein YPK_0625
YPK_TSS_52	NC_010465	-	240894		-54	rmTSS	TGA	YPK_0189		DNA circulation family protein
YPK_TSS_32	NC_010465	-	148166		-70	lmTSS	TTC	YPK_0122	pitA	phosphate transporter	+99	+99	+99
YPK_TSS_33	NC_010465	+	148352		-90	rmTSS	ACC	YPK_0123	yhiN	HI0933 family protein	+186	+186	+186
ID: identity
TSS: transcriptional start site
UTR: untranslated region
nt: nucleotide
ORF: open reading frame
1Orientation of the predicted TSS on the Y. pseudotuberculosis YPIII chromosome or pYV virulence plasmid (("+") forward and ("-") reverse strand according to accession NC_010465 for the chromosome or accession NC_006153 for the pYV virulence plasmid).
2Genomic coordinates of the predicted TSS on the Y. pseudotuberculosis YPIII chromosome or pYV virulence plasmid according to the forward strand.
3Indicates an alternativeTSS position, as the TSS could not be mapped to a single nucleotide position.
4Distance between the predicted TSS and the annotated translational start site of the downstream gene.
5Denotes the TSS category: lmTSS (TSS of leaderless mRNAs); rmTSS (TSS of mRNAs to be reannotated).
6Denotes the first 3 synthesized 5' nucleotides of the respective mRNA.
7Position of the annotated translational start site in Y. pseudotuberculosis IP32953/IP31758, Y. pestis CO92 or the PB1/+ virulence plasmid relative to the YPIII annotated translational start.

## Sheet: sRNAs reclassified as TSS
Dataset S2-5: YPIII 5'-UTRs classified as putative sRNAs in earlier studies.
TSS ID	Accession	Strand1	TSS location2	Length 5'-UTR3 [nt]	Associated feature	Gene symbol	Annotated function	Predicted putative sRNA4	Predicted riboswitch-like element5
YPK_TSS_8	NC_010465	-	34969	185	YPK_0031		conserved hypothetical protein	sR033
YPK_TSS_28	NC_010465	-	144861	86	YPK_0119	gdhA	glutamate dehydrogenase (NADP(+))	sR060
YPK_TSS_38	NC_010465	+	188954	183	YPK_0147	glgB	1,4-alpha-glucan branching enzyme	sR032
YPK_TSS_170	NC_010465	+	709558	432	YPK_0649	ribB	3,4-dihydroxy-2-butanone 4-phosphate synthase	Ysr183/SroG	RLE0011 (FMN riboswitch)
YPK_TSS_204	NC_010465	-	985358	289	YPK_0861	zapA	Z-ring-associated protein	sR062
YPK_TSS_216	NC_010465	-	1160191	130	YPK_1031	tas	aldo/keto reductase	sR029
YPK_TSS_286	NC_010465	+	1493057	40	YPK_1352	upp	uracil phosphoribosyltransferase	sR028
YPK_TSS_321	NC_010465	+	1672877	172	YPK_1510		conserved hypothetical protein	Ysr78
YPK_TSS_358	NC_010465	-	1865858	365	YPK_1677	rne	ribonuclease, Rne/Rng family	sR010
YPK_TSS_510	NC_010465	+	2351896	69	YPK_2121	minC	septum site-determining protein MinC	sR050
YPK_TSS_614	NC_010465	-	2818797	240	YPK_2566	mglB	periplasmic binding protein/LacI transcriptional regulator	sR072
YPK_TSS_637	NC_010465	+	2910984	94	YPK_2649	ompF	porin Gram-negative type	sR070
YPK_TSS_655	NC_010465	-	2957949	214	YPK_2681	serS	seryl-tRNA synthetase	Ysr174
YPK_TSS_656	NC_010465	-	2965016	338	YPK_2686	lrp-2	transcriptional regulator, AsnC family	sR046
YPK_TSS_723	NC_010465	-	3220708	217	YPK_2922	moaA	molybdenum cofactor biosynthesis protein A	Ysr177	RLE0073 (Moco riboswitch*)
YPK_TSS_726	NC_010465	-	3232960	81	YPK_2933	pgl	6-phosphogluconolactonase	sR041
YPK_TSS_775	NC_010465	-	3349143	119	YPK_3046	iolG	inositol 2-dehydrogenase	sR080
YPK_TSS_797	NC_010465	-	3492133	343	YPK_3192	ddhD	oxidoreductase FAD/NAD(P)-binding domain protein	Ysr112
YPK_TSS_815	NC_010465	-	3533183	214	YPK_3230	ppiD	PpiC-type peptidyl-prolyl cis-trans isomerase	sR069
YPK_TSS_868	NC_010465	-	3698920	127	YPK_3372	csrA	carbon storage regulator, CsrA	sR066
YPK_TSS_900	NC_010465	-	3820403	189	YPK_3477	yadG	ABC transporter related	Ysr32
YPK_TSS_907	NC_010465	-	3831275	228	YPK_3487	acnB	aconitate hydratase 2	sR064
YPK_TSS_958	NC_010465	+	4063637	223	YPK_3679	pepA	leucyl aminopeptidase	sR039
YPK_TSS_1011	NC_010465	-	4214548	362	YPK_3824	fxsA	FxsA cytoplasmic membrane protein	sR067
YPK_TSS_1059	NC_010465	-	4481056	274	YPK_4061	ilvG	acetolactate synthase, large subunit, biosynthetic type	Ysr28	RLE0027
YPK_TSS_1062	NC_010465	-	4498938	315	YPK_4073	btuB	TonB-dependent vitamin B12 receptor	sR058	RLE0001 (Cobalamin riboswitch)
ID: identity
TSS: transcriptional start site
UTR: untranslated region
nt: nucleotide
*Regulski et al., 2008
1Orientation of the predicted TSS on the Y. pseudotuberculosis YPIII chromosome or pYV virulence plasmid (("+") forward and ("-") reverse strand according to NC_010465 for the chromosome or NC_006153 for the pYV virulence plasmid).
2Genomic coordinates of the predicted TSS on the Y. pseudotuberculosis YPIII chromosome or pYV virulence plasmid according to the forward strand.
3Distance between the predicted TSS and the annotated translational start site of the downstream located CDS.
4Denotes that a 5'-UTR starting from the indicated TSS identified in this study matches with a putative sRNA identified in Y. pseudotuberulosis and Y. pestis (Koo et. al., 2011; Beauregard et al., 2013 and Yan et al., 2013).
5mRNAs with a 5'-UTR ≥ 200 nt were screened for putative riboswitch-like elements using the Ribex Riboswitch explorer (Abreu-Goodger & Merino, 2005).
